# Supplementary material for: The relationship between social comparison orientation and social network addiction among college students: the mediating role of fear of negative evaluation and the moderating role of core self-evaluation
Source: Research Square preprint supplement (doi:10.21203/rs.3.rs-7194599/v1), 2025-08-28
Supplement: Supplementary file 1 [file f8c86b42793d44aca7b6158d.xlsx]

## Sheet: Original data
id	gender	age	edu	glass	location	single	Q1	Q2	Q3	Q4	Q5	Q6	Q7	Q8	Q9	Q10	Q11	Q12	Q13	Q14	TA	TB	TC	TD	TE	TF	TG	TH	TI	TJ
1	1	18	1	1	1	1	4	0	1	1	1	1	0	0	0	0	0	4	4	1	4	2.5	3	3.66667	2.61905	3.18182	3.36364	4	3.41667	3.1
2	1	18	1	1	1	1	4	0	1	1	1	1	0	0	0	0	0	4	4	1	4	2.5	3	3.66667	2.61905	3.18182	3.36364	4	3.41667	3.1
3	1	18	1	1	1	1	4	0	1	1	1	1	0	0	0	0	0	4	4	1	4	2.5	3	3.66667	2.61905	3.18182	3.36364	4	3.41667	3.1
4	1	18	1	1	1	1	4	0	1	1	1	1	0	0	0	0	0	4	4	1	4	2.5	3	3.66667	2.61905	3.18182	3.36364	4	3.41667	3.1
5	2	18	1	1	2	2	4	1	1	1	1	1	0	0	0	0	0	6	8	2	2.66667	3.5	2.5	3.77778	2.69841	3.27273	2.27273	4	2.5	4
6	2	18	1	1	2	2	4	1	1	1	1	1	0	0	0	0	0	6	8	2	2.66667	3.5	2.5	3.77778	2.69841	3.27273	2.27273	4	2.5	4
7	2	18	1	1	2	2	4	1	1	1	1	1	0	0	0	0	0	6	8	2	2.66667	3.5	2.5	3.77778	2.69841	3.27273	2.27273	4	2.5	4
8	2	18	1	1	2	2	4	1	1	1	1	1	0	0	0	0	0	6	8	2	2.66667	3.5	2.5	3.77778	2.69841	3.27273	2.27273	4	2.5	4
9	1	18	1	1	1	1	4	0	1	1	1	1	0	0	0	0	0	4	4	1	4	2.5	3	3.66667	2.61905	3.18182	3.36364	4	3.41667	3.1
10	1	19	2	2	2	2	4	1	1	1	0	1	0	0	1	1	0	7	9	1	4	2.75	3.2	4.33333	3.09524	3.09091	3.45455	1.9	2.83333	2.9
11	1	19	2	2	2	2	4	1	1	1	0	1	0	0	1	1	0	7	9	1	4	2.75	3.2	4.33333	3.09524	3.09091	3.45455	1.9	2.83333	2.9
12	1	19	2	2	2	2	4	1	1	1	0	1	0	0	1	1	0	7	9	1	4	2.75	3.2	4.33333	3.09524	3.09091	3.45455	1.9	2.83333	2.9
15	1	19	2	2	2	2	4	1	1	1	0	1	0	0	1	1	0	7	9	1	4	2.75	3.2	4.33333	3.09524	3.09091	3.45455	1.9	2.83333	2.9
16	1	19	1	1	2	1	2	1	1	0	0	1	0	0	1	1	0	7	2	1	4.33333	3.5	2.9	5	3.57143	3.72727	3.63636	3.4	4.08333	2.6
17	1	19	1	1	2	1	2	1	1	0	0	1	0	0	1	1	0	7	2	1	4.33333	3.5	2.9	5	3.57143	3.72727	3.63636	3.4	4.08333	2.6
18	1	19	1	1	2	1	2	1	1	0	0	1	0	0	1	1	0	7	2	1	4.33333	3.5	2.9	5	3.57143	3.72727	3.63636	3.4	4.08333	2.6
19	1	19	1	1	2	1	2	1	1	0	0	1	0	0	1	1	0	7	2	1	4.33333	3.5	2.9	5	3.57143	3.72727	3.63636	3.4	4.08333	2.6
20	1	20	2	1	1	2	3	1	1	0	0	1	0	1	0	1	0	3	4	1	1	3	1.8	1.66667	1.19048	2.81818	2.09091	3.8	2.91667	3.6
21	1	20	2	1	1	2	3	1	1	0	0	1	0	1	0	1	0	3	4	1	1	3	1.8	1.66667	1.19048	2.81818	2.09091	3.8	2.91667	3.6
22	1	20	2	1	1	2	3	1	1	0	0	1	0	1	0	1	0	3	4	1	1	3	1.8	1.66667	1.19048	2.81818	2.09091	3.8	2.91667	3.6
31	1	20	2	1	1	2	3	1	1	0	0	1	0	1	0	1	0	3	4	1	1	3	1.8	1.66667	1.19048	2.81818	2.09091	3.8	2.91667	3.6
32	1	20	2	1	1	2	3	1	1	0	0	1	0	1	0	1	0	3	4	1	1	3	1.8	1.66667	1.19048	2.81818	2.09091	3.8	2.91667	3.6
33	1	20	2	1	1	2	3	1	1	0	0	1	0	1	0	1	0	3	4	1	1	3	1.8	1.66667	1.19048	2.81818	2.09091	3.8	2.91667	3.6
34	1	20	2	1	1	2	3	1	1	0	0	1	0	1	0	1	0	3	4	1	1	3	1.8	1.66667	1.19048	2.81818	2.09091	3.8	2.91667	3.6
39	1	20	2	1	1	2	3	1	1	0	0	1	0	1	0	1	0	3	4	1	1	3	1.8	1.66667	1.19048	2.81818	2.09091	3.8	2.91667	3.6
40	1	18	1	1	2	1	3	1	1	1	0	0	0	0	0	1	0	7	6	1	3.5	3.75	3.1	4	2.85714	3.09091	2.36364	5	2.83333	4
41	1	18	1	1	2	1	3	1	1	1	0	0	0	0	0	1	0	7	6	1	3.5	3.75	3.1	4	2.85714	3.09091	2.36364	5	2.83333	4
42	1	18	1	1	2	1	3	1	1	1	0	0	0	0	0	1	0	7	6	1	3.5	3.75	3.1	4	2.85714	3.09091	2.36364	5	2.83333	4
43	1	18	1	1	2	1	3	1	1	1	0	0	0	0	0	1	0	7	6	1	3.5	3.75	3.1	4	2.85714	3.09091	2.36364	5	2.83333	4
44	1	18	1	1	2	1	3	1	1	1	1	1	0	1	0	0	0	7	2	2	1	2.5	3.8	3.88889	2.77778	4.09091	4.54545	4.5	4.08333	3.3
45	1	18	1	1	2	1	3	1	1	1	1	1	0	1	0	0	0	7	2	2	1	2.5	3.8	3.88889	2.77778	4.09091	4.54545	4.5	4.08333	3.3
46	1	18	1	1	2	1	3	1	1	1	1	1	0	1	0	0	0	7	2	2	1	2.5	3.8	3.88889	2.77778	4.09091	4.54545	4.5	4.08333	3.3
47	1	18	1	1	2	1	3	1	1	1	1	1	0	1	0	0	0	7	2	2	1	2.5	3.8	3.88889	2.77778	4.09091	4.54545	4.5	4.08333	3.3
48	1	18	1	1	2	1	3	1	1	1	1	1	0	1	0	0	0	7	2	2	1	2.5	3.8	3.88889	2.77778	4.09091	4.54545	4.5	4.08333	3.3
49	1	18	1	1	2	1	3	1	1	1	1	1	0	1	0	0	0	7	2	2	1	2.5	3.8	3.88889	2.77778	4.09091	4.54545	4.5	4.08333	3.3
50	1	18	1	1	2	1	3	1	1	1	1	1	0	1	0	0	0	7	2	2	1	2.5	3.8	3.88889	2.77778	4.09091	4.54545	4.5	4.08333	3.3
53	1	18	1	1	2	1	3	1	1	1	1	1	0	1	0	0	0	7	2	2	1	2.5	3.8	3.88889	2.77778	4.09091	4.54545	4.5	4.08333	3.3
54	1	18	1	1	2	1	3	1	1	1	1	1	0	1	0	0	0	7	2	2	1	2.5	3.8	3.88889	2.77778	4.09091	4.54545	4.5	4.08333	3.3
55	1	18	1	1	2	1	3	1	1	1	1	1	0	1	0	0	0	7	2	2	1	2.5	3.8	3.88889	2.77778	4.09091	4.54545	4.5	4.08333	3.3
56	1	18	1	1	2	1	3	1	1	1	1	1	0	1	0	0	0	7	2	2	1	2.5	3.8	3.88889	2.77778	4.09091	4.54545	4.5	4.08333	3.3
57	1	18	1	1	2	1	3	1	1	1	1	1	0	1	0	0	0	7	2	2	1	2.5	3.8	3.88889	2.77778	4.09091	4.54545	4.5	4.08333	3.3
58	1	18	1	1	2	1	3	1	1	1	1	1	0	1	0	0	0	7	2	2	1	2.5	3.8	3.88889	2.77778	4.09091	4.54545	4.5	4.08333	3.3
59	1	18	1	1	2	1	3	1	1	1	1	1	0	1	0	0	0	7	2	2	1	2.5	3.8	3.88889	2.77778	4.09091	4.54545	4.5	4.08333	3.3
60	1	18	1	1	2	1	3	1	1	1	1	1	0	1	0	0	0	7	2	2	1	2.5	3.8	3.88889	2.77778	4.09091	4.54545	4.5	4.08333	3.3
65	1	18	1	1	2	1	3	1	1	1	1	1	0	1	0	0	0	7	2	2	1	2.5	3.8	3.88889	2.77778	4.09091	4.54545	4.5	4.08333	3.3
66	1	19	1	1	2	2	2	1	1	1	1	0	1	0	0	1	0	4	8	1	1	2.75	1	4.77778	3.4127	1.72727	1.72727	3.4	1	3.4
67	1	19	1	1	2	2	2	1	1	1	1	0	1	0	0	1	0	4	8	1	1	2.75	1	4.77778	3.4127	1.72727	1.72727	3.4	1	3.4
68	1	19	1	1	2	2	2	1	1	1	1	0	1	0	0	1	0	4	8	1	1	2.75	1	4.77778	3.4127	1.72727	1.72727	3.4	1	3.4
69	1	19	1	1	2	2	2	1	1	1	1	0	1	0	0	1	0	4	8	1	1	2.75	1	4.77778	3.4127	1.72727	1.72727	3.4	1	3.4
70	1	20	2	2	1	1	4	1	1	0	0	1	0	1	0	0	0	4	3	2	5	3	2.8	4.66667	3.33333	3	3.63636	4	4	3.2
71	1	20	2	2	1	1	4	1	1	0	0	1	0	1	0	0	0	4	3	2	5	3	2.8	4.66667	3.33333	3	3.63636	4	4	3.2
72	1	20	2	2	1	1	4	1	1	0	0	1	0	1	0	0	0	4	3	2	5	3	2.8	4.66667	3.33333	3	3.63636	4	4	3.2
76	1	20	2	2	1	1	4	1	1	0	0	1	0	1	0	0	0	4	3	2	5	3	2.8	4.66667	3.33333	3	3.63636	4	4	3.2
77	2	18	1	1	1	1	2	1	1	0	0	1	0	0	0	0	1	7	1	1	2.16667	3.5	2.5	4.33333	3.09524	2.72727	3.72727	2.8	3.5	2.7
78	2	18	1	1	1	1	2	1	1	0	0	1	0	0	0	0	1	7	1	1	2.16667	3.5	2.5	4.33333	3.09524	2.72727	3.72727	2.8	3.5	2.7
79	2	18	1	1	1	1	2	1	1	0	0	1	0	0	0	0	1	7	1	1	2.16667	3.5	2.5	4.33333	3.09524	2.72727	3.72727	2.8	3.5	2.7
80	2	18	1	1	1	1	2	1	1	0	0	1	0	0	0	0	1	7	1	1	2.16667	3.5	2.5	4.33333	3.09524	2.72727	3.72727	2.8	3.5	2.7
81	2	18	1	1	1	1	2	1	1	0	0	1	0	0	0	0	1	7	1	1	2.16667	3.5	2.5	4.33333	3.09524	2.72727	3.72727	2.8	3.5	2.7
82	2	18	1	1	1	1	2	1	1	0	0	1	0	0	0	0	1	7	1	1	2.16667	3.5	2.5	4.33333	3.09524	2.72727	3.72727	2.8	3.5	2.7
83	2	18	1	1	1	1	2	1	1	0	0	1	0	0	0	0	1	7	1	1	2.16667	3.5	2.5	4.33333	3.09524	2.72727	3.72727	2.8	3.5	2.7
87	2	18	1	1	1	1	2	1	1	0	0	1	0	0	0	0	1	7	1	1	2.16667	3.5	2.5	4.33333	3.09524	2.72727	3.72727	2.8	3.5	2.7
88	2	18	1	1	1	1	2	1	1	0	0	1	0	0	0	0	1	7	1	1	2.16667	3.5	2.5	4.33333	3.09524	2.72727	3.72727	2.8	3.5	2.7
89	2	18	1	1	1	1	2	1	1	0	0	1	0	0	0	0	1	7	1	1	2.16667	3.5	2.5	4.33333	3.09524	2.72727	3.72727	2.8	3.5	2.7
90	2	18	1	1	1	1	2	1	1	0	0	1	0	0	0	0	1	7	1	1	2.16667	3.5	2.5	4.33333	3.09524	2.72727	3.72727	2.8	3.5	2.7
91	2	18	1	1	1	1	2	1	1	0	0	1	0	0	0	0	1	7	1	1	2.16667	3.5	2.5	4.33333	3.09524	2.72727	3.72727	2.8	3.5	2.7
92	2	20	2	2	1	2	2	1	1	1	0	1	0	0	0	0	0	4	4	1	4	2	2.2	4	2.85714	3	3	3	3	3
93	2	20	2	2	1	2	2	1	1	1	0	1	0	0	0	0	0	4	4	1	4	2	2.2	4	2.85714	3	3	3	3	3
94	2	20	2	2	1	2	2	1	1	1	0	1	0	0	0	0	0	4	4	1	4	2	2.2	4	2.85714	3	3	3	3	3
98	2	20	2	2	1	2	2	1	1	1	0	1	0	0	0	0	0	4	4	1	4	2	2.2	4	2.85714	3	3	3	3	3
99	2	19	2	2	2	2	2	1	1	0	0	1	0	0	0	0	1	3	7	2	1.16667	4.25	2.5	2.55556	1.8254	2.36364	2.36364	4	2	4
100	2	19	2	2	2	2	2	1	1	0	0	1	0	0	0	0	1	3	7	2	1.16667	4.25	2.5	2.55556	1.8254	2.36364	2.36364	4	2	4
101	2	19	2	2	2	2	2	1	1	0	0	1	0	0	0	0	1	3	7	2	1.16667	4.25	2.5	2.55556	1.8254	2.36364	2.36364	4	2	4
102	2	19	2	2	2	2	2	1	1	0	0	1	0	0	0	0	1	3	7	2	1.16667	4.25	2.5	2.55556	1.8254	2.36364	2.36364	4	2	4
103	2	20	1	1	1	2	2	1	0	1	0	0	0	0	0	0	0	5	3	2	3.5	3	2.9	3.66667	2.61905	3	3.81818	4	3.5	2.9
104	2	20	1	1	1	2	2	1	0	1	0	0	0	0	0	0	0	5	3	2	3.5	3	2.9	3.66667	2.61905	3	3.81818	4	3.5	2.9
105	2	20	1	1	1	2	2	1	0	1	0	0	0	0	0	0	0	5	3	2	3.5	3	2.9	3.66667	2.61905	3	3.81818	4	3.5	2.9
108	2	20	1	1	1	2	2	1	0	1	0	0	0	0	0	0	0	5	3	2	3.5	3	2.9	3.66667	2.61905	3	3.81818	4	3.5	2.9
109	2	19	1	1	1	1	2	1	1	1	1	0	0	0	0	1	0	7	7	2	1.33333	2.75	3	1.22222	0.873016	3.54545	3.63636	4	3.58333	3.2
110	2	19	1	1	1	1	2	1	1	1	1	0	0	0	0	1	0	7	7	2	1.33333	2.75	3	1.22222	0.873016	3.54545	3.63636	4	3.58333	3.2
111	2	19	1	1	1	1	2	1	1	1	1	0	0	0	0	1	0	7	7	2	1.33333	2.75	3	1.22222	0.873016	3.54545	3.63636	4	3.58333	3.2
112	2	19	1	1	1	1	2	1	1	1	1	0	0	0	0	1	0	7	7	2	1.33333	2.75	3	1.22222	0.873016	3.54545	3.63636	4	3.58333	3.2
113	2	19	1	1	1	1	2	1	1	1	1	0	0	0	0	1	0	7	7	2	1.33333	2.75	3	1.22222	0.873016	3.54545	3.63636	4	3.58333	3.2
114	2	19	1	1	1	1	2	1	1	1	1	0	0	0	0	1	0	7	7	2	1.33333	2.75	3	1.22222	0.873016	3.54545	3.63636	4	3.58333	3.2
115	2	19	1	1	1	1	2	1	1	1	1	0	0	0	0	1	0	7	7	2	1.33333	2.75	3	1.22222	0.873016	3.54545	3.63636	4	3.58333	3.2
116	2	19	1	1	1	1	2	1	1	1	1	0	0	0	0	1	0	7	7	2	1.33333	2.75	3	1.22222	0.873016	3.54545	3.63636	4	3.58333	3.2
117	1	20	1	1	1	1	2	1	1	1	0	1	1	0	0	1	0	4	2	1	1	3.25	3.2	2.33333	1.66667	2.54545	3	3	3.16667	4.8
118	1	20	1	1	1	1	2	1	1	1	0	1	1	0	0	1	0	4	2	1	1	3.25	3.2	2.33333	1.66667	2.54545	3	3	3.16667	4.8
119	1	20	1	1	1	1	2	1	1	1	0	1	1	0	0	1	0	4	2	1	1	3.25	3.2	2.33333	1.66667	2.54545	3	3	3.16667	4.8
120	1	20	1	1	1	1	2	1	1	1	0	1	1	0	0	1	0	4	2	1	1	3.25	3.2	2.33333	1.66667	2.54545	3	3	3.16667	4.8
121	1	20	1	1	1	1	2	1	1	1	0	1	1	0	0	1	0	4	2	1	1	3.25	3.2	2.33333	1.66667	2.54545	3	3	3.16667	4.8
122	1	20	1	1	1	1	2	1	1	1	0	1	1	0	0	1	0	4	2	1	1	3.25	3.2	2.33333	1.66667	2.54545	3	3	3.16667	4.8
123	1	20	1	1	1	1	2	1	1	1	0	1	1	0	0	1	0	4	2	1	1	3.25	3.2	2.33333	1.66667	2.54545	3	3	3.16667	4.8
126	1	20	1	1	1	1	2	1	1	1	0	1	1	0	0	1	0	4	2	1	1	3.25	3.2	2.33333	1.66667	2.54545	3	3	3.16667	4.8
127	1	20	1	1	2	2	4	1	1	1	1	1	0	0	0	0	0	5	3	2	3.5	2.75	2.5	3.88889	2.77778	3.09091	3.27273	3.7	3.33333	3.2
128	1	20	1	1	2	2	4	1	1	1	1	1	0	0	0	0	0	5	3	2	3.5	2.75	2.5	3.88889	2.77778	3.09091	3.27273	3.7	3.33333	3.2
129	1	20	1	1	2	2	4	1	1	1	1	1	0	0	0	0	0	5	3	2	3.5	2.75	2.5	3.88889	2.77778	3.09091	3.27273	3.7	3.33333	3.2
130	1	20	1	1	2	2	4	1	1	1	1	1	0	0	0	0	0	5	3	2	3.5	2.75	2.5	3.88889	2.77778	3.09091	3.27273	3.7	3.33333	3.2
131	2	20	1	1	1	2	3	1	1	1	0	0	0	0	0	0	0	7	5	1	3.66667	4	3.3	5.66667	4.04762	3.54545	3.27273	4	3.91667	2.5
132	2	20	1	1	1	2	3	1	1	1	0	0	0	0	0	0	0	7	5	1	3.66667	4	3.3	5.66667	4.04762	3.54545	3.27273	4	3.91667	2.5
133	2	20	1	1	1	2	3	1	1	1	0	0	0	0	0	0	0	7	5	1	3.66667	4	3.3	5.66667	4.04762	3.54545	3.27273	4	3.91667	2.5
137	2	20	1	1	1	2	3	1	1	1	0	0	0	0	0	0	0	7	5	1	3.66667	4	3.3	5.66667	4.04762	3.54545	3.27273	4	3.91667	2.5
138	2	20	1	1	2	2	3	1	1	1	0	0	0	0	0	0	0	5	5	2	2	3.75	2	3.55556	2.53968	2.81818	2.63636	3.9	3.41667	3.9
139	2	20	1	1	2	2	3	1	1	1	0	0	0	0	0	0	0	5	5	2	2	3.75	2	3.55556	2.53968	2.81818	2.63636	3.9	3.41667	3.9
140	2	20	1	1	2	2	3	1	1	1	0	0	0	0	0	0	0	5	5	2	2	3.75	2	3.55556	2.53968	2.81818	2.63636	3.9	3.41667	3.9
141	2	20	1	1	2	2	3	1	1	1	0	0	0	0	0	0	0	5	5	2	2	3.75	2	3.55556	2.53968	2.81818	2.63636	3.9	3.41667	3.9
142	2	20	2	2	1	1	3	1	1	1	0	1	1	0	0	0	0	3	8	2	3.33333	3.5	3.1	4.55556	3.25397	3.27273	3.27273	4	3.66667	3.8
143	2	20	2	2	1	1	3	1	1	1	0	1	1	0	0	0	0	3	8	2	3.33333	3.5	3.1	4.55556	3.25397	3.27273	3.27273	4	3.66667	3.8
144	2	20	2	2	1	1	3	1	1	1	0	1	1	0	0	0	0	3	8	2	3.33333	3.5	3.1	4.55556	3.25397	3.27273	3.27273	4	3.66667	3.8
148	2	20	2	2	1	1	3	1	1	1	0	1	1	0	0	0	0	3	8	2	3.33333	3.5	3.1	4.55556	3.25397	3.27273	3.27273	4	3.66667	3.8
149	2	19	1	1	2	2	2	1	1	1	0	0	0	0	0	0	0	4	2	1	1	3.5	2.8	4.88889	3.49206	3.27273	3.81818	3.8	3.66667	4.1
150	2	19	1	1	2	2	2	1	1	1	0	0	0	0	0	0	0	4	2	1	1	3.5	2.8	4.88889	3.49206	3.27273	3.81818	3.8	3.66667	4.1
151	2	19	1	1	2	2	2	1	1	1	0	0	0	0	0	0	0	4	2	1	1	3.5	2.8	4.88889	3.49206	3.27273	3.81818	3.8	3.66667	4.1
152	2	19	1	1	2	2	2	1	1	1	0	0	0	0	0	0	0	4	2	1	1	3.5	2.8	4.88889	3.49206	3.27273	3.81818	3.8	3.66667	4.1
153	2	19	1	1	2	2	2	1	1	1	0	0	0	0	0	0	0	3	2	2	4	3	1.5	4	2.85714	3	3	3.7	3.08333	3.8
154	2	19	1	1	2	2	2	1	1	1	0	0	0	0	0	0	0	3	2	2	4	3	1.5	4	2.85714	3	3	3.7	3.08333	3.8
155	2	19	1	1	2	2	2	1	1	1	0	0	0	0	0	0	0	3	2	2	4	3	1.5	4	2.85714	3	3	3.7	3.08333	3.8
159	2	19	1	1	2	2	2	1	1	1	0	0	0	0	0	0	0	3	2	2	4	3	1.5	4	2.85714	3	3	3.7	3.08333	3.8
160	2	21	1	2	2	2	3	1	1	1	1	0	0	0	0	0	0	5	1	1	1.16667	3	1.5	1.33333	0.952381	2.36364	2.72727	2.9	2	3.4
161	2	21	1	2	2	2	3	1	1	1	1	0	0	0	0	0	0	5	1	1	1.16667	3	1.5	1.33333	0.952381	2.36364	2.72727	2.9	2	3.4
162	2	21	1	2	2	2	3	1	1	1	1	0	0	0	0	0	0	5	1	1	1.16667	3	1.5	1.33333	0.952381	2.36364	2.72727	2.9	2	3.4
163	2	21	1	2	2	2	3	1	1	1	1	0	0	0	0	0	0	5	1	1	1.16667	3	1.5	1.33333	0.952381	2.36364	2.72727	2.9	2	3.4
164	2	21	1	2	2	2	3	1	1	1	1	0	0	0	0	0	0	5	1	1	1.16667	3	1.5	1.33333	0.952381	2.36364	2.72727	2.9	2	3.4
165	2	21	1	2	2	2	3	1	1	1	1	0	0	0	0	0	0	5	1	1	1.16667	3	1.5	1.33333	0.952381	2.36364	2.72727	2.9	2	3.4
166	2	21	1	2	2	2	3	1	1	1	1	0	0	0	0	0	0	5	1	1	1.16667	3	1.5	1.33333	0.952381	2.36364	2.72727	2.9	2	3.4
170	2	21	1	2	2	2	3	1	1	1	1	0	0	0	0	0	0	5	1	1	1.16667	3	1.5	1.33333	0.952381	2.36364	2.72727	2.9	2	3.4
171	2	21	2	2	1	1	3	1	1	0	0	1	0	0	0	0	0	7	1	2	2.33333	2	3.2	4	2.85714	3.63636	4.54545	3.9	3.58333	2.5
172	2	21	2	2	1	1	3	1	1	0	0	1	0	0	0	0	0	7	1	2	2.33333	2	3.2	4	2.85714	3.63636	4.54545	3.9	3.58333	2.5
173	2	21	2	2	1	1	3	1	1	0	0	1	0	0	0	0	0	7	1	2	2.33333	2	3.2	4	2.85714	3.63636	4.54545	3.9	3.58333	2.5
177	2	21	2	2	1	1	3	1	1	0	0	1	0	0	0	0	0	7	1	2	2.33333	2	3.2	4	2.85714	3.63636	4.54545	3.9	3.58333	2.5
178	2	21	1	2	2	2	3	1	1	1	1	0	0	0	0	0	0	5	1	1	1.16667	3	1.5	1.33333	0.952381	2.36364	2.72727	2.9	2	3.4
179	2	21	1	2	2	2	3	1	1	1	1	0	0	0	0	0	0	5	1	1	1.16667	3	1.5	1.33333	0.952381	2.36364	2.72727	2.9	2	3.4
180	2	21	1	2	2	2	3	1	1	1	1	0	0	0	0	0	0	5	1	1	1.16667	3	1.5	1.33333	0.952381	2.36364	2.72727	2.9	2	3.4
183	2	21	1	2	2	2	3	1	1	1	1	0	0	0	0	0	0	5	1	1	1.16667	3	1.5	1.33333	0.952381	2.36364	2.72727	2.9	2	3.4
184	2	21	1	2	2	2	3	1	1	1	1	0	0	0	0	0	0	5	1	1	1.16667	3	1.5	1.33333	0.952381	2.36364	2.72727	2.9	2	3.4
185	2	21	1	2	2	2	3	1	1	1	1	0	0	0	0	0	0	5	1	1	1.16667	3	1.5	1.33333	0.952381	2.36364	2.72727	2.9	2	3.4
186	2	21	1	2	2	2	3	1	1	1	1	0	0	0	0	0	0	5	1	1	1.16667	3	1.5	1.33333	0.952381	2.36364	2.72727	2.9	2	3.4
187	2	21	1	2	2	2	3	1	1	1	1	0	0	0	0	0	0	5	1	1	1.16667	3	1.5	1.33333	0.952381	2.36364	2.72727	2.9	2	3.4
188	2	19	1	1	1	2	3	1	1	1	0	0	0	0	0	0	0	4	3	2	2	3	2.8	2.77778	1.98413	3.09091	2.09091	3.8	2.75	4.6
189	2	19	1	1	1	2	3	1	1	1	0	0	0	0	0	0	0	4	3	2	2	3	2.8	2.77778	1.98413	3.09091	2.09091	3.8	2.75	4.6
190	2	19	1	1	1	2	3	1	1	1	0	0	0	0	0	0	0	4	3	2	2	3	2.8	2.77778	1.98413	3.09091	2.09091	3.8	2.75	4.6
193	2	19	1	1	1	2	3	1	1	1	0	0	0	0	0	0	0	4	3	2	2	3	2.8	2.77778	1.98413	3.09091	2.09091	3.8	2.75	4.6
194	1	20	2	2	1	1	4	0	1	0	0	1	0	1	0	1	0	3	9	1	4	3	3.4	2.66667	1.90476	3.36364	1.54545	4.7	1.75	3.3
195	1	20	2	2	1	1	4	0	1	0	0	1	0	1	0	1	0	3	9	1	4	3	3.4	2.66667	1.90476	3.36364	1.54545	4.7	1.75	3.3
196	1	20	2	2	1	1	4	0	1	0	0	1	0	1	0	1	0	3	9	1	4	3	3.4	2.66667	1.90476	3.36364	1.54545	4.7	1.75	3.3
197	1	20	2	2	1	1	4	0	1	0	0	1	0	1	0	1	0	3	9	1	4	3	3.4	2.66667	1.90476	3.36364	1.54545	4.7	1.75	3.3
198	1	20	2	2	1	1	4	0	1	0	0	1	0	1	0	1	0	3	9	1	4	3	3.4	2.66667	1.90476	3.36364	1.54545	4.7	1.75	3.3
199	1	20	2	2	1	1	4	0	1	0	0	1	0	1	0	1	0	3	9	1	4	3	3.4	2.66667	1.90476	3.36364	1.54545	4.7	1.75	3.3
200	1	20	2	2	1	1	4	0	1	0	0	1	0	1	0	1	0	3	9	1	4	3	3.4	2.66667	1.90476	3.36364	1.54545	4.7	1.75	3.3
201	1	20	2	2	1	1	4	0	1	0	0	1	0	1	0	1	0	3	9	1	4	3	3.4	2.66667	1.90476	3.36364	1.54545	4.7	1.75	3.3
202	2	20	1	1	1	2	3	1	1	0	1	0	0	0	0	0	0	6	6	1	2	3.75	2.2	3.33333	2.38095	2.63636	2.09091	4.1	2.5	4.8
203	2	20	1	1	1	2	3	1	1	0	1	0	0	0	0	0	0	6	6	1	2	3.75	2.2	3.33333	2.38095	2.63636	2.09091	4.1	2.5	4.8
204	2	20	1	1	1	2	3	1	1	0	1	0	0	0	0	0	0	6	6	1	2	3.75	2.2	3.33333	2.38095	2.63636	2.09091	4.1	2.5	4.8
207	2	20	1	1	1	2	3	1	1	0	1	0	0	0	0	0	0	6	6	1	2	3.75	2.2	3.33333	2.38095	2.63636	2.09091	4.1	2.5	4.8
208	2	20	1	1	1	2	3	1	1	0	1	0	0	0	0	0	0	6	6	1	2	3.75	2.2	3.33333	2.38095	2.63636	2.09091	4.1	2.5	4.8
209	2	20	1	1	1	2	3	1	1	0	1	0	0	0	0	0	0	6	6	1	2	3.75	2.2	3.33333	2.38095	2.63636	2.09091	4.1	2.5	4.8
210	2	20	1	1	1	2	3	1	1	0	1	0	0	0	0	0	0	6	6	1	2	3.75	2.2	3.33333	2.38095	2.63636	2.09091	4.1	2.5	4.8
213	2	20	1	1	1	2	3	1	1	0	1	0	0	0	0	0	0	6	6	1	2	3.75	2.2	3.33333	2.38095	2.63636	2.09091	4.1	2.5	4.8
214	2	20	1	1	1	2	3	1	0	1	0	0	0	0	0	0	0	3	3	2	3	2.5	2.8	4.33333	3.09524	3.36364	3.54545	4	2.91667	3.3
215	2	20	1	1	1	2	3	1	0	1	0	0	0	0	0	0	0	3	3	2	3	2.5	2.8	4.33333	3.09524	3.36364	3.54545	4	2.91667	3.3
216	2	20	1	1	1	2	3	1	0	1	0	0	0	0	0	0	0	3	3	2	3	2.5	2.8	4.33333	3.09524	3.36364	3.54545	4	2.91667	3.3
217	2	20	1	1	1	2	3	1	0	1	0	0	0	0	0	0	0	3	3	2	3	2.5	2.8	4.33333	3.09524	3.36364	3.54545	4	2.91667	3.3
218	2	18	1	1	1	2	2	1	1	0	0	1	0	0	0	0	0	2	3	2	2.5	3.75	2	2.11111	1.50794	2.27273	2.54545	4.3	2.25	4
219	2	18	1	1	1	2	2	1	1	0	0	1	0	0	0	0	0	2	3	2	2.5	3.75	2	2.11111	1.50794	2.27273	2.54545	4.3	2.25	4
220	2	18	1	1	1	2	2	1	1	0	0	1	0	0	0	0	0	2	3	2	2.5	3.75	2	2.11111	1.50794	2.27273	2.54545	4.3	2.25	4
221	2	18	1	1	1	2	2	1	1	0	0	1	0	0	0	0	0	2	3	2	2.5	3.75	2	2.11111	1.50794	2.27273	2.54545	4.3	2.25	4
222	2	18	1	1	1	2	2	1	1	0	0	1	0	0	0	0	0	2	3	2	2.5	3.75	2	2.11111	1.50794	2.27273	2.54545	4.3	2.25	4
223	2	18	1	1	1	2	2	1	1	0	0	1	0	0	0	0	0	2	3	2	2.5	3.75	2	2.11111	1.50794	2.27273	2.54545	4.3	2.25	4
224	2	18	1	1	1	2	2	1	1	0	0	1	0	0	0	0	0	2	3	2	2.5	3.75	2	2.11111	1.50794	2.27273	2.54545	4.3	2.25	4
227	2	18	1	1	1	2	2	1	1	0	0	1	0	0	0	0	0	2	3	2	2.5	3.75	2	2.11111	1.50794	2.27273	2.54545	4.3	2.25	4
228	2	19	2	2	2	1	2	1	1	0	0	1	0	0	0	0	0	6	2	2	2.33333	2.75	3.4	4.11111	2.93651	3.63636	3.63636	4.4	3.75	3.1
229	2	19	2	2	2	1	2	1	1	0	0	1	0	0	0	0	0	6	2	2	2.33333	2.75	3.4	4.11111	2.93651	3.63636	3.63636	4.4	3.75	3.1
230	2	19	2	2	2	1	2	1	1	0	0	1	0	0	0	0	0	6	2	2	2.33333	2.75	3.4	4.11111	2.93651	3.63636	3.63636	4.4	3.75	3.1
233	2	19	2	2	2	1	2	1	1	0	0	1	0	0	0	0	0	6	2	2	2.33333	2.75	3.4	4.11111	2.93651	3.63636	3.63636	4.4	3.75	3.1
234	2	18	1	1	2	2	2	1	0	1	0	0	0	0	0	0	0	7	1	2	2.66667	2.25	2.2	3.66667	2.61905	3.36364	1.45455	4.4	3.16667	3.5
235	2	18	1	1	2	2	2	1	0	1	0	0	0	0	0	0	0	7	1	2	2.66667	2.25	2.2	3.66667	2.61905	3.36364	1.45455	4.4	3.16667	3.5
236	2	18	1	1	2	2	2	1	0	1	0	0	0	0	0	0	0	7	1	2	2.66667	2.25	2.2	3.66667	2.61905	3.36364	1.45455	4.4	3.16667	3.5
237	2	18	1	1	2	2	2	1	0	1	0	0	0	0	0	0	0	7	1	2	2.66667	2.25	2.2	3.66667	2.61905	3.36364	1.45455	4.4	3.16667	3.5
238	2	20	2	2	1	1	3	1	1	0	0	1	0	0	0	0	0	3	4	2	4.33333	3.25	2.6	1.44444	1.03175	3.18182	3.63636	5	3.91667	2.7
239	2	20	2	2	1	1	3	1	1	0	0	1	0	0	0	0	0	3	4	2	4.33333	3.25	2.6	1.44444	1.03175	3.18182	3.63636	5	3.91667	2.7
240	2	20	2	2	1	1	3	1	1	0	0	1	0	0	0	0	0	3	4	2	4.33333	3.25	2.6	1.44444	1.03175	3.18182	3.63636	5	3.91667	2.7
243	2	20	2	2	1	1	3	1	1	0	0	1	0	0	0	0	0	3	4	2	4.33333	3.25	2.6	1.44444	1.03175	3.18182	3.63636	5	3.91667	2.7
244	2	20	2	2	1	1	3	1	1	0	0	1	0	0	0	0	0	3	4	2	4.33333	3.25	2.6	1.44444	1.03175	3.18182	3.63636	5	3.91667	2.7
245	2	20	2	2	1	1	3	1	1	0	0	1	0	0	0	0	0	3	4	2	4.33333	3.25	2.6	1.44444	1.03175	3.18182	3.63636	5	3.91667	2.7
246	2	20	2	2	1	1	3	1	1	0	0	1	0	0	0	0	0	3	4	2	4.33333	3.25	2.6	1.44444	1.03175	3.18182	3.63636	5	3.91667	2.7
247	2	20	2	2	1	1	3	1	1	0	0	1	0	0	0	0	0	3	4	2	4.33333	3.25	2.6	1.44444	1.03175	3.18182	3.63636	5	3.91667	2.7
248	2	18	1	1	1	2	3	1	1	1	0	0	0	0	0	0	0	4	4	2	4.83333	3.25	2.9	4.77778	3.4127	4	2.81818	4.4	3.75	3.5
249	2	18	1	1	1	2	3	1	1	1	0	0	0	0	0	0	0	4	4	2	4.83333	3.25	2.9	4.77778	3.4127	4	2.81818	4.4	3.75	3.5
250	2	18	1	1	1	2	3	1	1	1	0	0	0	0	0	0	0	4	4	2	4.83333	3.25	2.9	4.77778	3.4127	4	2.81818	4.4	3.75	3.5
254	2	18	1	1	1	2	3	1	1	1	0	0	0	0	0	0	0	4	4	2	4.83333	3.25	2.9	4.77778	3.4127	4	2.81818	4.4	3.75	3.5
255	1	19	1	1	2	1	4	1	1	1	0	0	0	0	0	1	0	6	5	2	1	4	2.9	3.55556	2.53968	2.54545	3.72727	4	3.66667	3.6
256	1	19	1	1	2	1	4	1	1	1	0	0	0	0	0	1	0	6	5	2	1	4	2.9	3.55556	2.53968	2.54545	3.72727	4	3.66667	3.6
257	1	19	1	1	2	1	4	1	1	1	0	0	0	0	0	1	0	6	5	2	1	4	2.9	3.55556	2.53968	2.54545	3.72727	4	3.66667	3.6
259	1	19	1	1	2	1	4	1	1	1	0	0	0	0	0	1	0	6	5	2	1	4	2.9	3.55556	2.53968	2.54545	3.72727	4	3.66667	3.6
260	1	19	1	1	2	1	4	1	1	1	0	0	0	0	0	1	0	6	5	2	1	4	2.9	3.55556	2.53968	2.54545	3.72727	4	3.66667	3.6
261	1	19	1	1	2	1	4	1	1	1	0	0	0	0	0	1	0	6	5	2	1	4	2.9	3.55556	2.53968	2.54545	3.72727	4	3.66667	3.6
262	1	19	1	1	2	1	4	1	1	1	0	0	0	0	0	1	0	6	5	2	1	4	2.9	3.55556	2.53968	2.54545	3.72727	4	3.66667	3.6
265	1	19	1	1	2	1	4	1	1	1	0	0	0	0	0	1	0	6	5	2	1	4	2.9	3.55556	2.53968	2.54545	3.72727	4	3.66667	3.6
266	1	18	1	1	1	1	4	1	0	1	0	0	0	0	0	0	0	5	6	2	2	3.25	2.8	2	1.42857	4	3.45455	4	4	3.2
267	1	18	1	1	1	1	4	1	0	1	0	0	0	0	0	0	0	5	6	2	2	3.25	2.8	2	1.42857	4	3.45455	4	4	3.2
268	1	18	1	1	1	1	4	1	0	1	0	0	0	0	0	0	0	5	6	2	2	3.25	2.8	2	1.42857	4	3.45455	4	4	3.2
269	1	18	1	1	1	1	4	1	0	1	0	0	0	0	0	0	0	5	6	2	2	3.25	2.8	2	1.42857	4	3.45455	4	4	3.2
270	2	18	1	1	1	2	2	1	1	1	1	0	0	0	0	0	0	7	4	2	4	3.25	2.8	3.66667	2.61905	3	3.90909	4	3.75	2.7
271	2	18	1	1	1	2	2	1	1	1	1	0	0	0	0	0	0	7	4	2	4	3.25	2.8	3.66667	2.61905	3	3.90909	4	3.75	2.7
272	2	18	1	1	1	2	2	1	1	1	1	0	0	0	0	0	0	7	4	2	4	3.25	2.8	3.66667	2.61905	3	3.90909	4	3.75	2.7
274	2	18	1	1	1	2	2	1	1	1	1	0	0	0	0	0	0	7	4	2	4	3.25	2.8	3.66667	2.61905	3	3.90909	4	3.75	2.7
275	1	19	1	1	1	2	4	1	1	1	1	0	0	0	1	1	0	7	8	1	1	2	2.8	1	0.714286	3.81818	2.18182	4.9	2.66667	5
277	1	19	1	1	1	2	4	1	1	1	1	0	0	0	1	1	0	7	8	1	1	2	2.8	1	0.714286	3.81818	2.18182	4.9	2.66667	5
278	1	19	1	1	1	2	4	1	1	1	1	0	0	0	1	1	0	7	8	1	1	2	2.8	1	0.714286	3.81818	2.18182	4.9	2.66667	5
279	1	19	1	1	1	2	4	1	1	1	1	0	0	0	1	1	0	7	8	1	1	2	2.8	1	0.714286	3.81818	2.18182	4.9	2.66667	5
280	2	19	1	1	2	2	3	1	1	1	0	0	0	0	0	0	0	6	3	2	2.66667	2.5	3.2	3.44444	2.46032	3.36364	3.90909	3.8	2.83333	3.4
281	2	19	1	1	2	2	3	1	1	1	0	0	0	0	0	0	0	6	3	2	2.66667	2.5	3.2	3.44444	2.46032	3.36364	3.90909	3.8	2.83333	3.4
282	2	19	1	1	2	2	3	1	1	1	0	0	0	0	0	0	0	6	3	2	2.66667	2.5	3.2	3.44444	2.46032	3.36364	3.90909	3.8	2.83333	3.4
285	2	19	1	1	2	2	3	1	1	1	0	0	0	0	0	0	0	6	3	2	2.66667	2.5	3.2	3.44444	2.46032	3.36364	3.90909	3.8	2.83333	3.4
286	1	19	1	1	1	2	4	1	1	1	1	0	0	0	1	1	0	7	8	1	1	2	2.8	1	0.714286	3.81818	2.18182	4.9	2.66667	5
287	1	19	1	1	1	2	4	1	1	1	1	0	0	0	1	1	0	7	8	1	1	2	2.8	1	0.714286	3.81818	2.18182	4.9	2.66667	5
288	1	19	1	1	1	2	4	1	1	1	1	0	0	0	1	1	0	7	8	1	1	2	2.8	1	0.714286	3.81818	2.18182	4.9	2.66667	5
290	1	19	1	1	1	2	4	1	1	1	1	0	0	0	1	1	0	7	8	1	1	2	2.8	1	0.714286	3.81818	2.18182	4.9	2.66667	5
291	1	20	1	1	2	1	3	1	1	1	1	1	1	1	0	0	0	6	5	2	2.66667	2	2	2	1.42857	2.27273	2.36364	3	2.83333	3.4
292	1	20	1	1	2	1	3	1	1	1	1	1	1	1	0	0	0	6	5	2	2.66667	2	2	2	1.42857	2.27273	2.36364	3	2.83333	3.4
293	1	20	1	1	2	1	3	1	1	1	1	1	1	1	0	0	0	6	5	2	2.66667	2	2	2	1.42857	2.27273	2.36364	3	2.83333	3.4
294	1	20	1	1	2	1	3	1	1	1	1	1	1	1	0	0	0	6	5	2	2.66667	2	2	2	1.42857	2.27273	2.36364	3	2.83333	3.4
295	1	19	1	1	1	2	4	1	1	1	1	0	0	0	0	0	0	7	9	1	2.16667	2.75	2.6	3.11111	2.22222	2.72727	3.45455	3.8	2	4.1
296	1	19	1	1	1	2	4	1	1	1	1	0	0	0	0	0	0	7	9	1	2.16667	2.75	2.6	3.11111	2.22222	2.72727	3.45455	3.8	2	4.1
297	1	19	1	1	1	2	4	1	1	1	1	0	0	0	0	0	0	7	9	1	2.16667	2.75	2.6	3.11111	2.22222	2.72727	3.45455	3.8	2	4.1
299	1	19	1	1	1	2	4	1	1	1	1	0	0	0	0	0	0	7	9	1	2.16667	2.75	2.6	3.11111	2.22222	2.72727	3.45455	3.8	2	4.1
300	2	19	1	1	2	2	3	1	1	1	0	0	0	0	0	0	0	6	5	1	2.16667	3.75	3.3	3.33333	2.38095	3.54545	3.09091	4.7	3.5	2.5
301	2	19	1	1	2	2	3	1	1	1	0	0	0	0	0	0	0	6	5	1	2.16667	3.75	3.3	3.33333	2.38095	3.54545	3.09091	4.7	3.5	2.5
302	2	19	1	1	2	2	3	1	1	1	0	0	0	0	0	0	0	6	5	1	2.16667	3.75	3.3	3.33333	2.38095	3.54545	3.09091	4.7	3.5	2.5
303	2	19	1	1	2	2	3	1	1	1	0	0	0	0	0	0	0	6	5	1	2.16667	3.75	3.3	3.33333	2.38095	3.54545	3.09091	4.7	3.5	2.5
304	1	20	1	1	2	1	1	1	1	1	1	0	0	0	0	0	0	4	2	2	3.5	2	3.7	4.11111	2.93651	3.81818	4.18182	2.8	3.83333	3.2
305	1	20	1	1	2	1	1	1	1	1	1	0	0	0	0	0	0	4	2	2	3.5	2	3.7	4.11111	2.93651	3.81818	4.18182	2.8	3.83333	3.2
306	1	20	1	1	2	1	1	1	1	1	1	0	0	0	0	0	0	4	2	2	3.5	2	3.7	4.11111	2.93651	3.81818	4.18182	2.8	3.83333	3.2
308	1	20	1	1	2	1	1	1	1	1	1	0	0	0	0	0	0	4	2	2	3.5	2	3.7	4.11111	2.93651	3.81818	4.18182	2.8	3.83333	3.2
309	2	20	1	1	1	2	2	1	1	1	1	0	0	0	0	0	0	7	1	1	2	3.5	3.8	4.88889	3.49206	3.72727	4.27273	3.5	3.83333	2.1
310	2	20	1	1	1	2	2	1	1	1	1	0	0	0	0	0	0	7	1	1	2	3.5	3.8	4.88889	3.49206	3.72727	4.27273	3.5	3.83333	2.1
311	2	20	1	1	1	2	2	1	1	1	1	0	0	0	0	0	0	7	1	1	2	3.5	3.8	4.88889	3.49206	3.72727	4.27273	3.5	3.83333	2.1
312	2	20	1	1	1	2	2	1	1	1	1	0	0	0	0	0	0	7	1	1	2	3.5	3.8	4.88889	3.49206	3.72727	4.27273	3.5	3.83333	2.1
313	1	21	1	1	1	2	4	1	1	1	0	1	1	0	0	1	0	7	8	1	3.5	3.5	2.9	2.66667	1.90476	3.45455	3.18182	4.8	3	2.9
314	1	21	1	1	1	2	4	1	1	1	0	1	1	0	0	1	0	7	8	1	3.5	3.5	2.9	2.66667	1.90476	3.45455	3.18182	4.8	3	2.9
315	1	21	1	1	1	2	4	1	1	1	0	1	1	0	0	1	0	7	8	1	3.5	3.5	2.9	2.66667	1.90476	3.45455	3.18182	4.8	3	2.9
316	1	21	1	1	1	2	4	1	1	1	0	1	1	0	0	1	0	7	8	1	3.5	3.5	2.9	2.66667	1.90476	3.45455	3.18182	4.8	3	2.9
317	1	19	1	1	1	2	3	1	1	1	0	0	0	0	0	0	0	5	9	2	4	3	2.7	3.66667	2.61905	3.09091	3.18182	3.6	3.75	3.6
318	1	19	1	1	1	2	3	1	1	1	0	0	0	0	0	0	0	5	9	2	4	3	2.7	3.66667	2.61905	3.09091	3.18182	3.6	3.75	3.6
319	1	19	1	1	1	2	3	1	1	1	0	0	0	0	0	0	0	5	9	2	4	3	2.7	3.66667	2.61905	3.09091	3.18182	3.6	3.75	3.6
320	1	19	1	1	1	2	3	1	1	1	0	0	0	0	0	0	0	5	9	2	4	3	2.7	3.66667	2.61905	3.09091	3.18182	3.6	3.75	3.6
321	2	20	2	2	1	1	2	1	1	1	0	0	0	0	0	0	1	7	1	2	4	2.25	3.3	4	2.85714	3	3	3.7	3	3.2
322	2	20	2	2	1	1	2	1	1	1	0	0	0	0	0	0	1	7	1	2	4	2.25	3.3	4	2.85714	3	3	3.7	3	3.2
323	2	20	2	2	1	1	2	1	1	1	0	0	0	0	0	0	1	7	1	2	4	2.25	3.3	4	2.85714	3	3	3.7	3	3.2
324	2	20	2	2	1	1	2	1	1	1	0	0	0	0	0	0	1	7	1	2	4	2.25	3.3	4	2.85714	3	3	3.7	3	3.2
325	2	20	1	1	1	1	3	1	1	1	0	0	0	0	0	0	0	5	2	2	2	3.5	2.2	3.33333	2.38095	3.36364	1.81818	4	2.83333	4
326	2	20	1	1	1	1	3	1	1	1	0	0	0	0	0	0	0	5	2	2	2	3.5	2.2	3.33333	2.38095	3.36364	1.81818	4	2.83333	4
327	2	20	1	1	1	1	3	1	1	1	0	0	0	0	0	0	0	5	2	2	2	3.5	2.2	3.33333	2.38095	3.36364	1.81818	4	2.83333	4
330	2	20	1	1	1	1	3	1	1	1	0	0	0	0	0	0	0	5	2	2	2	3.5	2.2	3.33333	2.38095	3.36364	1.81818	4	2.83333	4
331	2	20	1	1	2	2	2	1	0	1	0	0	0	0	0	0	0	4	3	2	2.66667	3	2.4	4.11111	2.93651	3.63636	3.18182	5	3.58333	3.3
332	2	20	1	1	2	2	2	1	0	1	0	0	0	0	0	0	0	4	3	2	2.66667	3	2.4	4.11111	2.93651	3.63636	3.18182	5	3.58333	3.3
333	2	20	1	1	2	2	2	1	0	1	0	0	0	0	0	0	0	4	3	2	2.66667	3	2.4	4.11111	2.93651	3.63636	3.18182	5	3.58333	3.3
336	2	20	1	1	2	2	2	1	0	1	0	0	0	0	0	0	0	4	3	2	2.66667	3	2.4	4.11111	2.93651	3.63636	3.18182	5	3.58333	3.3
337	2	19	1	1	2	2	2	0	0	1	0	0	0	0	0	0	0	6	3	1	4.16667	3	2.6	4	2.85714	3.54545	2.90909	3	3	3.2
338	2	19	1	1	2	2	2	0	0	1	0	0	0	0	0	0	0	6	3	1	4.16667	3	2.6	4	2.85714	3.54545	2.90909	3	3	3.2
339	2	19	1	1	2	2	2	0	0	1	0	0	0	0	0	0	0	6	3	1	4.16667	3	2.6	4	2.85714	3.54545	2.90909	3	3	3.2
342	2	19	1	1	2	2	2	0	0	1	0	0	0	0	0	0	0	6	3	1	4.16667	3	2.6	4	2.85714	3.54545	2.90909	3	3	3.2
343	1	19	1	1	1	1	3	1	1	1	0	1	0	0	0	1	0	6	2	2	2.83333	2.75	2.2	3.77778	2.69841	2.72727	2.72727	3.2	2.91667	3.8
344	1	19	1	1	1	1	3	1	1	1	0	1	0	0	0	1	0	6	2	2	2.83333	2.75	2.2	3.77778	2.69841	2.72727	2.72727	3.2	2.91667	3.8
345	1	19	1	1	1	1	3	1	1	1	0	1	0	0	0	1	0	6	2	2	2.83333	2.75	2.2	3.77778	2.69841	2.72727	2.72727	3.2	2.91667	3.8
348	1	19	1	1	1	1	3	1	1	1	0	1	0	0	0	1	0	6	2	2	2.83333	2.75	2.2	3.77778	2.69841	2.72727	2.72727	3.2	2.91667	3.8
349	1	19	1	1	1	1	3	1	1	1	0	1	0	0	0	1	0	6	2	2	2.83333	2.75	2.2	3.77778	2.69841	2.72727	2.72727	3.2	2.91667	3.8
350	1	19	1	1	1	1	3	1	1	1	0	1	0	0	0	1	0	6	2	2	2.83333	2.75	2.2	3.77778	2.69841	2.72727	2.72727	3.2	2.91667	3.8
351	1	19	1	1	1	1	3	1	1	1	0	1	0	0	0	1	0	6	2	2	2.83333	2.75	2.2	3.77778	2.69841	2.72727	2.72727	3.2	2.91667	3.8
354	1	19	1	1	1	1	3	1	1	1	0	1	0	0	0	1	0	6	2	2	2.83333	2.75	2.2	3.77778	2.69841	2.72727	2.72727	3.2	2.91667	3.8
355	2	20	1	1	2	2	2	1	1	1	1	0	0	0	0	0	0	7	8	1	1	3	2.3	1.44444	1.03175	2.18182	3.18182	4.3	2.58333	3.3
356	2	20	1	1	2	2	2	1	1	1	1	0	0	0	0	0	0	7	8	1	1	3	2.3	1.44444	1.03175	2.18182	3.18182	4.3	2.58333	3.3
357	2	20	1	1	2	2	2	1	1	1	1	0	0	0	0	0	0	7	8	1	1	3	2.3	1.44444	1.03175	2.18182	3.18182	4.3	2.58333	3.3
360	2	20	1	1	2	2	2	1	1	1	1	0	0	0	0	0	0	7	8	1	1	3	2.3	1.44444	1.03175	2.18182	3.18182	4.3	2.58333	3.3
361	2	20	1	1	2	2	2	1	1	1	1	0	0	0	0	0	0	7	8	1	1	3	2.3	1.44444	1.03175	2.18182	3.18182	4.3	2.58333	3.3
362	2	20	1	1	2	2	2	1	1	1	1	0	0	0	0	0	0	7	8	1	1	3	2.3	1.44444	1.03175	2.18182	3.18182	4.3	2.58333	3.3
363	2	20	1	1	2	2	2	1	1	1	1	0	0	0	0	0	0	7	8	1	1	3	2.3	1.44444	1.03175	2.18182	3.18182	4.3	2.58333	3.3
365	2	20	1	1	2	2	2	1	1	1	1	0	0	0	0	0	0	7	8	1	1	3	2.3	1.44444	1.03175	2.18182	3.18182	4.3	2.58333	3.3
366	2	20	1	1	1	2	2	1	1	0	0	1	0	0	1	0	0	1	7	1	3.5	2	2.6	3.22222	2.30159	2.81818	2.72727	3.9	2.91667	4
367	2	20	1	1	1	2	2	1	1	0	0	1	0	0	1	0	0	1	7	1	3.5	2	2.6	3.22222	2.30159	2.81818	2.72727	3.9	2.91667	4
368	2	20	1	1	1	2	2	1	1	0	0	1	0	0	1	0	0	1	7	1	3.5	2	2.6	3.22222	2.30159	2.81818	2.72727	3.9	2.91667	4
369	2	20	1	1	1	2	2	1	1	0	0	1	0	0	1	0	0	1	7	1	3.5	2	2.6	3.22222	2.30159	2.81818	2.72727	3.9	2.91667	4
370	2	20	1	1	2	2	2	1	1	1	1	0	0	0	0	0	0	7	8	1	1	3	2.3	1.44444	1.03175	2.18182	3.18182	4.3	2.58333	3.3
371	2	20	1	1	2	2	2	1	1	1	1	0	0	0	0	0	0	7	8	1	1	3	2.3	1.44444	1.03175	2.18182	3.18182	4.3	2.58333	3.3
372	2	20	1	1	2	2	2	1	1	1	1	0	0	0	0	0	0	7	8	1	1	3	2.3	1.44444	1.03175	2.18182	3.18182	4.3	2.58333	3.3
373	2	20	1	1	2	2	2	1	1	1	1	0	0	0	0	0	0	7	8	1	1	3	2.3	1.44444	1.03175	2.18182	3.18182	4.3	2.58333	3.3
374	2	20	1	1	2	2	2	1	1	1	1	0	0	0	0	0	0	7	8	1	1	3	2.3	1.44444	1.03175	2.18182	3.18182	4.3	2.58333	3.3
375	2	20	1	1	2	2	2	1	1	1	1	0	0	0	0	0	0	7	8	1	1	3	2.3	1.44444	1.03175	2.18182	3.18182	4.3	2.58333	3.3
376	2	20	1	1	2	2	2	1	1	1	1	0	0	0	0	0	0	7	8	1	1	3	2.3	1.44444	1.03175	2.18182	3.18182	4.3	2.58333	3.3
377	2	20	1	1	2	2	2	1	1	1	1	0	0	0	0	0	0	7	8	1	1	3	2.3	1.44444	1.03175	2.18182	3.18182	4.3	2.58333	3.3
378	1	19	1	1	1	2	3	1	1	0	0	1	0	1	0	1	0	7	3	1	2	2	2.2	2.33333	1.66667	1.90909	2.72727	3.8	2.91667	3.2
379	1	19	1	1	1	2	3	1	1	0	0	1	0	1	0	1	0	7	3	1	2	2	2.2	2.33333	1.66667	1.90909	2.72727	3.8	2.91667	3.2
380	1	19	1	1	1	2	3	1	1	0	0	1	0	1	0	1	0	7	3	1	2	2	2.2	2.33333	1.66667	1.90909	2.72727	3.8	2.91667	3.2
381	1	19	1	1	1	2	3	1	1	0	0	1	0	1	0	1	0	7	3	1	2	2	2.2	2.33333	1.66667	1.90909	2.72727	3.8	2.91667	3.2
382	2	19	1	1	1	2	2	1	0	1	0	0	1	0	1	0	0	5	5	2	3.66667	3.75	3.5	4.66667	3.33333	3.63636	3.81818	3.9	3.5	2.5
383	2	19	1	1	1	2	2	1	0	1	0	0	1	0	1	0	0	5	5	2	3.66667	3.75	3.5	4.66667	3.33333	3.63636	3.81818	3.9	3.5	2.5
384	2	19	1	1	1	2	2	1	0	1	0	0	1	0	1	0	0	5	5	2	3.66667	3.75	3.5	4.66667	3.33333	3.63636	3.81818	3.9	3.5	2.5
386	2	19	1	1	1	2	2	1	0	1	0	0	1	0	1	0	0	5	5	2	3.66667	3.75	3.5	4.66667	3.33333	3.63636	3.81818	3.9	3.5	2.5
387	2	19	1	1	2	2	3	1	1	1	1	0	0	0	0	0	0	7	1	2	3.33333	4	2.1	3.77778	2.69841	2.90909	3.54545	4.2	3.66667	3.3
388	2	19	1	1	2	2	3	1	1	1	1	0	0	0	0	0	0	7	1	2	3.33333	4	2.1	3.77778	2.69841	2.90909	3.54545	4.2	3.66667	3.3
389	2	19	1	1	2	2	3	1	1	1	1	0	0	0	0	0	0	7	1	2	3.33333	4	2.1	3.77778	2.69841	2.90909	3.54545	4.2	3.66667	3.3
392	2	19	1	1	2	2	3	1	1	1	1	0	0	0	0	0	0	7	1	2	3.33333	4	2.1	3.77778	2.69841	2.90909	3.54545	4.2	3.66667	3.3
393	1	19	1	1	2	2	2	1	1	1	0	0	0	0	0	0	0	3	5	1	4	3	2.3	3.11111	2.22222	2.45455	3	3	3.41667	4.6
394	1	19	1	1	2	2	2	1	1	1	0	0	0	0	0	0	0	3	5	1	4	3	2.3	3.11111	2.22222	2.45455	3	3	3.41667	4.6
395	1	19	1	1	2	2	2	1	1	1	0	0	0	0	0	0	0	3	5	1	4	3	2.3	3.11111	2.22222	2.45455	3	3	3.41667	4.6
396	1	19	1	1	2	2	2	1	1	1	0	0	0	0	0	0	0	3	5	1	4	3	2.3	3.11111	2.22222	2.45455	3	3	3.41667	4.6
397	1	20	2	2	1	2	2	1	1	1	0	0	0	0	0	0	0	7	9	2	4	3	3	4	2.85714	3.09091	2.54545	4.1	2.5	2.8
398	1	20	2	2	1	2	2	1	1	1	0	0	0	0	0	0	0	7	9	2	4	3	3	4	2.85714	3.09091	2.54545	4.1	2.5	2.8
399	1	20	2	2	1	2	2	1	1	1	0	0	0	0	0	0	0	7	9	2	4	3	3	4	2.85714	3.09091	2.54545	4.1	2.5	2.8
402	1	20	2	2	1	2	2	1	1	1	0	0	0	0	0	0	0	7	9	2	4	3	3	4	2.85714	3.09091	2.54545	4.1	2.5	2.8
403	2	18	1	1	1	2	2	1	1	1	0	0	0	0	0	0	0	7	1	2	4	3	3	4	2.85714	3	3.45455	4	3.83333	2.8
404	2	18	1	1	1	2	2	1	1	1	0	0	0	0	0	0	0	7	1	2	4	3	3	4	2.85714	3	3.45455	4	3.83333	2.8
405	2	18	1	1	1	2	2	1	1	1	0	0	0	0	0	0	0	7	1	2	4	3	3	4	2.85714	3	3.45455	4	3.83333	2.8
407	2	18	1	1	1	2	2	1	1	1	0	0	0	0	0	0	0	7	1	2	4	3	3	4	2.85714	3	3.45455	4	3.83333	2.8
408	2	19	1	1	2	2	4	1	1	1	1	0	0	0	0	0	0	7	5	1	4	3	2	4.33333	3.09524	2.36364	2.36364	3.8	3.25	3.4
409	2	19	1	1	2	2	4	1	1	1	1	0	0	0	0	0	0	7	5	1	4	3	2	4.33333	3.09524	2.36364	2.36364	3.8	3.25	3.4
410	2	19	1	1	2	2	4	1	1	1	1	0	0	0	0	0	0	7	5	1	4	3	2	4.33333	3.09524	2.36364	2.36364	3.8	3.25	3.4
411	2	19	1	1	2	2	4	1	1	1	1	0	0	0	0	0	0	7	5	1	4	3	2	4.33333	3.09524	2.36364	2.36364	3.8	3.25	3.4
412	2	19	1	1	2	2	4	1	1	1	1	0	0	0	0	0	0	7	5	1	4	3	2	4.33333	3.09524	2.36364	2.36364	3.8	3.25	3.4
413	2	19	1	1	2	2	4	1	1	1	1	0	0	0	0	0	0	7	5	1	4	3	2	4.33333	3.09524	2.36364	2.36364	3.8	3.25	3.4
414	2	19	1	1	2	2	4	1	1	1	1	0	0	0	0	0	0	7	5	1	4	3	2	4.33333	3.09524	2.36364	2.36364	3.8	3.25	3.4
416	2	19	1	1	2	2	4	1	1	1	1	0	0	0	0	0	0	7	5	1	4	3	2	4.33333	3.09524	2.36364	2.36364	3.8	3.25	3.4
417	2	18	2	1	2	2	3	1	1	1	0	1	1	0	0	0	0	7	3	2	2	3	2.2	4.55556	3.25397	3.36364	2.90909	4	2.58333	3
418	2	18	2	1	2	2	3	1	1	1	0	1	1	0	0	0	0	7	3	2	2	3	2.2	4.55556	3.25397	3.36364	2.90909	4	2.58333	3
419	2	18	2	1	2	2	3	1	1	1	0	1	1	0	0	0	0	7	3	2	2	3	2.2	4.55556	3.25397	3.36364	2.90909	4	2.58333	3
420	2	18	2	1	2	2	3	1	1	1	0	1	1	0	0	0	0	7	3	2	2	3	2.2	4.55556	3.25397	3.36364	2.90909	4	2.58333	3
421	2	19	1	1	1	2	2	1	1	0	0	0	0	0	0	0	0	3	1	2	2.33333	2.75	1.8	2	1.42857	3	2.45455	3.9	2.41667	3.3
422	2	19	1	1	1	2	2	1	1	0	0	0	0	0	0	0	0	3	1	2	2.33333	2.75	1.8	2	1.42857	3	2.45455	3.9	2.41667	3.3
423	2	19	1	1	1	2	2	1	1	0	0	0	0	0	0	0	0	3	1	2	2.33333	2.75	1.8	2	1.42857	3	2.45455	3.9	2.41667	3.3
425	2	19	1	1	1	2	2	1	1	0	0	0	0	0	0	0	0	3	1	2	2.33333	2.75	1.8	2	1.42857	3	2.45455	3.9	2.41667	3.3
426	1	18	1	1	1	2	2	1	0	1	0	0	0	0	0	0	0	4	1	2	1.83333	2	2.8	3.22222	2.30159	3.36364	3.63636	3.8	3.66667	2.1
427	1	18	1	1	1	2	2	1	0	1	0	0	0	0	0	0	0	4	1	2	1.83333	2	2.8	3.22222	2.30159	3.36364	3.63636	3.8	3.66667	2.1
428	1	18	1	1	1	2	2	1	0	1	0	0	0	0	0	0	0	4	1	2	1.83333	2	2.8	3.22222	2.30159	3.36364	3.63636	3.8	3.66667	2.1
429	1	18	1	1	1	2	2	1	0	1	0	0	0	0	0	0	0	4	1	2	1.83333	2	2.8	3.22222	2.30159	3.36364	3.63636	3.8	3.66667	2.1
430	1	18	1	1	2	2	4	1	1	1	1	0	0	0	0	0	0	7	3	2	2.66667	4	2.8	3.77778	2.69841	2.45455	2.18182	3.7	2.08333	4.9
431	1	18	1	1	2	2	4	1	1	1	1	0	0	0	0	0	0	7	3	2	2.66667	4	2.8	3.77778	2.69841	2.45455	2.18182	3.7	2.08333	4.9
432	1	18	1	1	2	2	4	1	1	1	1	0	0	0	0	0	0	7	3	2	2.66667	4	2.8	3.77778	2.69841	2.45455	2.18182	3.7	2.08333	4.9
434	1	18	1	1	2	2	4	1	1	1	1	0	0	0	0	0	0	7	3	2	2.66667	4	2.8	3.77778	2.69841	2.45455	2.18182	3.7	2.08333	4.9
435	2	20	2	2	1	2	3	1	1	1	0	0	0	0	0	0	0	4	9	1	2	4	2.8	5	3.57143	3	4	4	4	2.8
436	2	20	2	2	1	2	3	1	1	1	0	0	0	0	0	0	0	4	9	1	2	4	2.8	5	3.57143	3	4	4	4	2.8
437	2	20	2	2	1	2	3	1	1	1	0	0	0	0	0	0	0	4	9	1	2	4	2.8	5	3.57143	3	4	4	4	2.8
438	2	20	2	2	1	2	3	1	1	1	0	0	0	0	0	0	0	4	9	1	2	4	2.8	5	3.57143	3	4	4	4	2.8
439	1	18	1	1	1	2	3	1	1	1	0	0	0	0	0	0	0	1	4	2	3.5	2.25	2.7	2.77778	1.98413	3.36364	4.27273	3.8	3.58333	4.4
440	1	18	1	1	1	2	3	1	1	1	0	0	0	0	0	0	0	1	4	2	3.5	2.25	2.7	2.77778	1.98413	3.36364	4.27273	3.8	3.58333	4.4
441	1	18	1	1	1	2	3	1	1	1	0	0	0	0	0	0	0	1	4	2	3.5	2.25	2.7	2.77778	1.98413	3.36364	4.27273	3.8	3.58333	4.4
442	1	18	1	1	1	2	3	1	1	1	0	0	0	0	0	0	0	1	4	2	3.5	2.25	2.7	2.77778	1.98413	3.36364	4.27273	3.8	3.58333	4.4
443	1	18	1	1	2	2	3	1	1	1	0	0	0	0	1	0	0	5	2	2	3.16667	3.75	2.6	3.44444	2.46032	3.54545	2.72727	4	3.25	3.1
444	1	18	1	1	2	2	3	1	1	1	0	0	0	0	1	0	0	5	2	2	3.16667	3.75	2.6	3.44444	2.46032	3.54545	2.72727	4	3.25	3.1
445	1	18	1	1	2	2	3	1	1	1	0	0	0	0	1	0	0	5	2	2	3.16667	3.75	2.6	3.44444	2.46032	3.54545	2.72727	4	3.25	3.1
446	1	18	1	1	2	2	3	1	1	1	0	0	0	0	1	0	0	5	2	2	3.16667	3.75	2.6	3.44444	2.46032	3.54545	2.72727	4	3.25	3.1
447	2	19	1	1	1	2	2	1	1	1	0	0	0	0	0	0	0	6	1	2	2.66667	2	2.6	3.33333	2.38095	2.63636	4.54545	3.3	3.83333	2.6
448	2	19	1	1	1	2	2	1	1	1	0	0	0	0	0	0	0	6	1	2	2.66667	2	2.6	3.33333	2.38095	2.63636	4.54545	3.3	3.83333	2.6
449	2	19	1	1	1	2	2	1	1	1	0	0	0	0	0	0	0	6	1	2	2.66667	2	2.6	3.33333	2.38095	2.63636	4.54545	3.3	3.83333	2.6
450	2	19	1	1	1	2	2	1	1	1	0	0	0	0	0	0	0	6	1	2	2.66667	2	2.6	3.33333	2.38095	2.63636	4.54545	3.3	3.83333	2.6
451	1	19	1	1	2	2	4	1	1	1	1	1	0	0	0	1	0	7	8	2	1	2.75	2	1.44444	1.03175	3.09091	2.63636	4	3.25	3.7
452	1	19	1	1	2	2	4	1	1	1	1	1	0	0	0	1	0	7	8	2	1	2.75	2	1.44444	1.03175	3.09091	2.63636	4	3.25	3.7
453	1	19	1	1	2	2	4	1	1	1	1	1	0	0	0	1	0	7	8	2	1	2.75	2	1.44444	1.03175	3.09091	2.63636	4	3.25	3.7
455	1	19	1	1	2	2	4	1	1	1	1	1	0	0	0	1	0	7	8	2	1	2.75	2	1.44444	1.03175	3.09091	2.63636	4	3.25	3.7
456	1	19	1	1	2	2	4	1	1	1	1	1	0	0	0	1	0	7	8	2	1	2.75	2	1.44444	1.03175	3.09091	2.63636	4	3.25	3.7
457	1	19	1	1	2	2	4	1	1	1	1	1	0	0	0	1	0	7	8	2	1	2.75	2	1.44444	1.03175	3.09091	2.63636	4	3.25	3.7
459	1	19	1	1	2	2	4	1	1	1	1	1	0	0	0	1	0	7	8	2	1	2.75	2	1.44444	1.03175	3.09091	2.63636	4	3.25	3.7
462	1	19	1	1	2	2	4	1	1	1	1	1	0	0	0	1	0	7	8	2	1	2.75	2	1.44444	1.03175	3.09091	2.63636	4	3.25	3.7
463	2	18	1	1	1	2	2	1	0	1	1	0	0	0	0	0	0	3	5	1	4	3	2	4.33333	3.09524	3.09091	3.81818	3.8	3.25	2.8
464	2	18	1	1	1	2	2	1	0	1	1	0	0	0	0	0	0	3	5	1	4	3	2	4.33333	3.09524	3.09091	3.81818	3.8	3.25	2.8
465	2	18	1	1	1	2	2	1	0	1	1	0	0	0	0	0	0	3	5	1	4	3	2	4.33333	3.09524	3.09091	3.81818	3.8	3.25	2.8
470	2	18	1	1	1	2	2	1	0	1	1	0	0	0	0	0	0	3	5	1	4	3	2	4.33333	3.09524	3.09091	3.81818	3.8	3.25	2.8
471	2	20	1	1	1	2	3	1	0	1	0	0	1	0	0	0	0	5	6	2	2.5	2.75	2.5	4.33333	3.09524	2.63636	3.09091	4	3.33333	3.3
472	2	20	1	1	1	2	3	1	0	1	0	0	1	0	0	0	0	5	6	2	2.5	2.75	2.5	4.33333	3.09524	2.63636	3.09091	4	3.33333	3.3
473	2	20	1	1	1	2	3	1	0	1	0	0	1	0	0	0	0	5	6	2	2.5	2.75	2.5	4.33333	3.09524	2.63636	3.09091	4	3.33333	3.3
474	2	20	1	1	1	2	3	1	0	1	0	0	1	0	0	0	0	5	6	2	2.5	2.75	2.5	4.33333	3.09524	2.63636	3.09091	4	3.33333	3.3
475	1	19	1	1	2	2	3	1	0	1	0	0	0	0	0	0	0	3	5	2	1	2.5	2	1.22222	0.873016	2	2	2.9	3.41667	4.6
476	1	19	1	1	2	2	3	1	0	1	0	0	0	0	0	0	0	3	5	2	1	2.5	2	1.22222	0.873016	2	2	2.9	3.41667	4.6
477	1	19	1	1	2	2	3	1	0	1	0	0	0	0	0	0	0	3	5	2	1	2.5	2	1.22222	0.873016	2	2	2.9	3.41667	4.6
480	1	19	1	1	2	2	3	1	0	1	0	0	0	0	0	0	0	3	5	2	1	2.5	2	1.22222	0.873016	2	2	2.9	3.41667	4.6
481	2	19	1	1	1	2	2	1	0	1	0	0	0	0	0	0	0	3	2	2	4	2.75	2.5	4.22222	3.01587	3.27273	2.63636	3.8	2.75	2.9
482	2	19	1	1	1	2	2	1	0	1	0	0	0	0	0	0	0	3	2	2	4	2.75	2.5	4.22222	3.01587	3.27273	2.63636	3.8	2.75	2.9
483	2	19	1	1	1	2	2	1	0	1	0	0	0	0	0	0	0	3	2	2	4	2.75	2.5	4.22222	3.01587	3.27273	2.63636	3.8	2.75	2.9
485	2	19	1	1	1	2	2	1	0	1	0	0	0	0	0	0	0	3	2	2	4	2.75	2.5	4.22222	3.01587	3.27273	2.63636	3.8	2.75	2.9
486	1	19	1	1	2	2	3	1	0	1	0	0	0	0	0	0	0	3	5	2	1	2.5	2	1.22222	0.873016	2	2	2.9	3.41667	4.6
487	1	19	1	1	2	2	3	1	0	1	0	0	0	0	0	0	0	3	5	2	1	2.5	2	1.22222	0.873016	2	2	2.9	3.41667	4.6
488	1	19	1	1	2	2	3	1	0	1	0	0	0	0	0	0	0	3	5	2	1	2.5	2	1.22222	0.873016	2	2	2.9	3.41667	4.6
489	1	19	1	1	2	2	3	1	0	1	0	0	0	0	0	0	0	3	5	2	1	2.5	2	1.22222	0.873016	2	2	2.9	3.41667	4.6
490	1	19	1	1	2	2	4	1	0	0	0	0	0	0	0	0	0	7	4	2	4	3.75	3.4	4.66667	3.33333	3.45455	3.27273	4	3.66667	2.9
491	1	19	1	1	2	2	4	1	0	0	0	0	0	0	0	0	0	7	4	2	4	3.75	3.4	4.66667	3.33333	3.45455	3.27273	4	3.66667	2.9
492	1	19	1	1	2	2	4	1	0	0	0	0	0	0	0	0	0	7	4	2	4	3.75	3.4	4.66667	3.33333	3.45455	3.27273	4	3.66667	2.9
494	1	19	1	1	2	2	4	1	0	0	0	0	0	0	0	0	0	7	4	2	4	3.75	3.4	4.66667	3.33333	3.45455	3.27273	4	3.66667	2.9
495	2	20	1	1	1	2	3	1	0	1	0	1	0	0	0	0	0	7	5	1	2.16667	3	3.2	4.11111	2.93651	3.63636	3.63636	4.9	2.33333	3.7
496	2	20	1	1	1	2	3	1	0	1	0	1	0	0	0	0	0	7	5	1	2.16667	3	3.2	4.11111	2.93651	3.63636	3.63636	4.9	2.33333	3.7
497	2	20	1	1	1	2	3	1	0	1	0	1	0	0	0	0	0	7	5	1	2.16667	3	3.2	4.11111	2.93651	3.63636	3.63636	4.9	2.33333	3.7
498	2	20	1	1	1	2	3	1	0	1	0	1	0	0	0	0	0	7	5	1	2.16667	3	3.2	4.11111	2.93651	3.63636	3.63636	4.9	2.33333	3.7
499	2	21	2	2	1	2	2	1	1	1	0	0	0	0	0	0	0	7	2	1	1.83333	3	2.8	4.11111	2.93651	2.81818	2.36364	2.5	2.75	3.5
500	2	21	2	2	1	2	2	1	1	1	0	0	0	0	0	0	0	7	2	1	1.83333	3	2.8	4.11111	2.93651	2.81818	2.36364	2.5	2.75	3.5
501	2	21	2	2	1	2	2	1	1	1	0	0	0	0	0	0	0	7	2	1	1.83333	3	2.8	4.11111	2.93651	2.81818	2.36364	2.5	2.75	3.5
503	2	21	2	2	1	2	2	1	1	1	0	0	0	0	0	0	0	7	2	1	1.83333	3	2.8	4.11111	2.93651	2.81818	2.36364	2.5	2.75	3.5
504	1	19	1	1	1	2	2	1	1	0	0	1	0	1	0	0	0	3	1	2	2.16667	1.5	1.9	1.77778	1.26984	3.81818	2.18182	3.9	3.5	2.2
505	1	19	1	1	1	2	2	1	1	0	0	1	0	1	0	0	0	3	1	2	2.16667	1.5	1.9	1.77778	1.26984	3.81818	2.18182	3.9	3.5	2.2
506	1	19	1	1	1	2	2	1	1	0	0	1	0	1	0	0	0	3	1	2	2.16667	1.5	1.9	1.77778	1.26984	3.81818	2.18182	3.9	3.5	2.2
507	1	19	1	1	1	2	2	1	1	0	0	1	0	1	0	0	0	3	1	2	2.16667	1.5	1.9	1.77778	1.26984	3.81818	2.18182	3.9	3.5	2.2
508	1	19	1	1	1	2	2	1	1	0	0	1	0	1	0	0	0	3	1	2	2.16667	1.5	1.9	1.77778	1.26984	3.81818	2.18182	3.9	3.5	2.2
509	1	19	1	1	1	2	2	1	1	0	0	1	0	1	0	0	0	3	1	2	2.16667	1.5	1.9	1.77778	1.26984	3.81818	2.18182	3.9	3.5	2.2
510	1	19	1	1	1	2	2	1	1	0	0	1	0	1	0	0	0	3	1	2	2.16667	1.5	1.9	1.77778	1.26984	3.81818	2.18182	3.9	3.5	2.2
511	1	19	1	1	1	2	2	1	1	0	0	1	0	1	0	0	0	3	1	2	2.16667	1.5	1.9	1.77778	1.26984	3.81818	2.18182	3.9	3.5	2.2
512	1	18	1	1	1	1	2	0	1	1	0	1	0	0	0	0	0	5	2	2	5	3	2.3	3.66667	2.61905	2.45455	2.81818	2.9	3.08333	3.4
513	1	18	1	1	1	1	2	0	1	1	0	1	0	0	0	0	0	5	2	2	5	3	2.3	3.66667	2.61905	2.45455	2.81818	2.9	3.08333	3.4
514	1	18	1	1	1	1	2	0	1	1	0	1	0	0	0	0	0	5	2	2	5	3	2.3	3.66667	2.61905	2.45455	2.81818	2.9	3.08333	3.4
515	1	18	1	1	1	1	2	0	1	1	0	1	0	0	0	0	0	5	2	2	5	3	2.3	3.66667	2.61905	2.45455	2.81818	2.9	3.08333	3.4
516	2	21	1	1	1	2	3	1	1	1	0	0	0	0	0	0	0	7	5	1	1.83333	3.75	1.7	1.66667	1.19048	2.36364	2.63636	3.7	2.33333	3.9
517	2	21	1	1	1	2	3	1	1	1	0	0	0	0	0	0	0	7	5	1	1.83333	3.75	1.7	1.66667	1.19048	2.36364	2.63636	3.7	2.33333	3.9
518	2	21	1	1	1	2	3	1	1	1	0	0	0	0	0	0	0	7	5	1	1.83333	3.75	1.7	1.66667	1.19048	2.36364	2.63636	3.7	2.33333	3.9
519	2	21	1	1	1	2	3	1	1	1	0	0	0	0	0	0	0	7	5	1	1.83333	3.75	1.7	1.66667	1.19048	2.36364	2.63636	3.7	2.33333	3.9
520	2	21	1	1	1	2	3	1	1	1	0	0	0	0	0	0	0	7	5	1	1.83333	3.75	1.7	1.66667	1.19048	2.36364	2.63636	3.7	2.33333	3.9
521	2	21	1	1	1	2	3	1	1	1	0	0	0	0	0	0	0	7	5	1	1.83333	3.75	1.7	1.66667	1.19048	2.36364	2.63636	3.7	2.33333	3.9
522	2	21	1	1	1	2	3	1	1	1	0	0	0	0	0	0	0	7	5	1	1.83333	3.75	1.7	1.66667	1.19048	2.36364	2.63636	3.7	2.33333	3.9
525	2	21	1	1	1	2	3	1	1	1	0	0	0	0	0	0	0	7	5	1	1.83333	3.75	1.7	1.66667	1.19048	2.36364	2.63636	3.7	2.33333	3.9
526	2	19	1	1	1	2	3	1	1	1	1	1	1	0	0	0	1	5	3	1	2.5	3.5	2.4	4.44444	3.1746	3.45455	3	4	2.91667	3.8
527	2	19	1	1	1	2	3	1	1	1	1	1	1	0	0	0	1	5	3	1	2.5	3.5	2.4	4.44444	3.1746	3.45455	3	4	2.91667	3.8
528	2	19	1	1	1	2	3	1	1	1	1	1	1	0	0	0	1	5	3	1	2.5	3.5	2.4	4.44444	3.1746	3.45455	3	4	2.91667	3.8
530	2	19	1	1	1	2	3	1	1	1	1	1	1	0	0	0	1	5	3	1	2.5	3.5	2.4	4.44444	3.1746	3.45455	3	4	2.91667	3.8
531	2	19	1	1	1	2	2	1	1	1	1	0	0	0	0	0	0	7	3	1	1.16667	3.5	2.4	4.88889	3.49206	3.54545	3.45455	3.8	3.16667	2.8
532	2	19	1	1	1	2	2	1	1	1	1	0	0	0	0	0	0	7	3	1	1.16667	3.5	2.4	4.88889	3.49206	3.54545	3.45455	3.8	3.16667	2.8
533	2	19	1	1	1	2	2	1	1	1	1	0	0	0	0	0	0	7	3	1	1.16667	3.5	2.4	4.88889	3.49206	3.54545	3.45455	3.8	3.16667	2.8
534	2	19	1	1	1	2	2	1	1	1	1	0	0	0	0	0	0	7	3	1	1.16667	3.5	2.4	4.88889	3.49206	3.54545	3.45455	3.8	3.16667	2.8
535	2	19	1	1	1	2	2	1	1	1	1	0	0	0	0	0	0	7	3	1	1.16667	3.5	2.4	4.88889	3.49206	3.54545	3.45455	3.8	3.16667	2.8
536	2	19	1	1	1	2	2	1	1	1	1	0	0	0	0	0	0	7	3	1	1.16667	3.5	2.4	4.88889	3.49206	3.54545	3.45455	3.8	3.16667	2.8
537	2	19	1	1	1	2	2	1	1	1	1	0	0	0	0	0	0	7	3	1	1.16667	3.5	2.4	4.88889	3.49206	3.54545	3.45455	3.8	3.16667	2.8
540	2	19	1	1	1	2	2	1	1	1	1	0	0	0	0	0	0	7	3	1	1.16667	3.5	2.4	4.88889	3.49206	3.54545	3.45455	3.8	3.16667	2.8
541	2	21	2	2	2	2	2	1	0	1	0	0	0	0	0	0	0	3	1	2	5.5	3.5	3.4	4.11111	2.93651	4	3.90909	3.9	4.33333	1.9
542	2	21	2	2	2	2	2	1	0	1	0	0	0	0	0	0	0	3	1	2	5.5	3.5	3.4	4.11111	2.93651	4	3.90909	3.9	4.33333	1.9
543	2	21	2	2	2	2	2	1	0	1	0	0	0	0	0	0	0	3	1	2	5.5	3.5	3.4	4.11111	2.93651	4	3.90909	3.9	4.33333	1.9
546	2	21	2	2	2	2	2	1	0	1	0	0	0	0	0	0	0	3	1	2	5.5	3.5	3.4	4.11111	2.93651	4	3.90909	3.9	4.33333	1.9
547	1	19	1	1	1	1	2	1	0	1	0	0	0	0	0	1	0	5	1	2	2.16667	2.75	1.7	1.88889	1.34921	2.54545	1.81818	3.4	2.58333	2.7
548	1	19	1	1	1	1	2	1	0	1	0	0	0	0	0	1	0	5	1	2	2.16667	2.75	1.7	1.88889	1.34921	2.54545	1.81818	3.4	2.58333	2.7
549	1	19	1	1	1	1	2	1	0	1	0	0	0	0	0	1	0	5	1	2	2.16667	2.75	1.7	1.88889	1.34921	2.54545	1.81818	3.4	2.58333	2.7
552	1	19	1	1	1	1	2	1	0	1	0	0	0	0	0	1	0	5	1	2	2.16667	2.75	1.7	1.88889	1.34921	2.54545	1.81818	3.4	2.58333	2.7
553	2	20	2	2	1	2	3	1	1	1	1	1	0	0	0	0	0	5	2	2	4.5	2.75	2.3	4.11111	2.93651	3.27273	3.63636	4	3.83333	2.6
554	2	20	2	2	1	2	3	1	1	1	1	1	0	0	0	0	0	5	2	2	4.5	2.75	2.3	4.11111	2.93651	3.27273	3.63636	4	3.83333	2.6
555	2	20	2	2	1	2	3	1	1	1	1	1	0	0	0	0	0	5	2	2	4.5	2.75	2.3	4.11111	2.93651	3.27273	3.63636	4	3.83333	2.6
557	2	20	2	2	1	2	3	1	1	1	1	1	0	0	0	0	0	5	2	2	4.5	2.75	2.3	4.11111	2.93651	3.27273	3.63636	4	3.83333	2.6
558	2	19	1	1	2	2	2	1	0	1	0	0	0	0	0	0	0	4	6	2	2.83333	2.75	2.8	3.44444	2.46032	3.72727	3.54545	4	3.08333	2.8
559	2	19	1	1	2	2	2	1	0	1	0	0	0	0	0	0	0	4	6	2	2.83333	2.75	2.8	3.44444	2.46032	3.72727	3.54545	4	3.08333	2.8
560	2	19	1	1	2	2	2	1	0	1	0	0	0	0	0	0	0	4	6	2	2.83333	2.75	2.8	3.44444	2.46032	3.72727	3.54545	4	3.08333	2.8
561	2	19	1	1	2	2	2	1	0	1	0	0	0	0	0	0	0	4	6	2	2.83333	2.75	2.8	3.44444	2.46032	3.72727	3.54545	4	3.08333	2.8
562	2	19	1	1	2	2	2	1	0	1	0	0	0	0	0	0	0	4	6	2	2.83333	2.75	2.8	3.44444	2.46032	3.72727	3.54545	4	3.08333	2.8
563	2	19	1	1	2	2	2	1	0	1	0	0	0	0	0	0	0	4	6	2	2.83333	2.75	2.8	3.44444	2.46032	3.72727	3.54545	4	3.08333	2.8
564	2	19	1	1	2	2	2	1	0	1	0	0	0	0	0	0	0	4	6	2	2.83333	2.75	2.8	3.44444	2.46032	3.72727	3.54545	4	3.08333	2.8
566	2	19	1	1	2	2	2	1	0	1	0	0	0	0	0	0	0	4	6	2	2.83333	2.75	2.8	3.44444	2.46032	3.72727	3.54545	4	3.08333	2.8
567	2	21	2	2	2	2	4	1	1	1	1	0	0	1	1	1	0	3	6	2	4	2	1.4	1	0.714286	1.90909	2	4.7	1.5	2.8
568	2	21	2	2	2	2	4	1	1	1	1	0	0	1	1	1	0	3	6	2	4	2	1.4	1	0.714286	1.90909	2	4.7	1.5	2.8
569	2	21	2	2	2	2	4	1	1	1	1	0	0	1	1	1	0	3	6	2	4	2	1.4	1	0.714286	1.90909	2	4.7	1.5	2.8
570	2	21	2	2	2	2	4	1	1	1	1	0	0	1	1	1	0	3	6	2	4	2	1.4	1	0.714286	1.90909	2	4.7	1.5	2.8
571	2	21	2	2	2	2	4	1	1	1	1	0	0	1	1	1	0	3	6	2	4	2	1.4	1	0.714286	1.90909	2	4.7	1.5	2.8
572	2	21	2	2	2	2	4	1	1	1	1	0	0	1	1	1	0	3	6	2	4	2	1.4	1	0.714286	1.90909	2	4.7	1.5	2.8
573	2	21	2	2	2	2	4	1	1	1	1	0	0	1	1	1	0	3	6	2	4	2	1.4	1	0.714286	1.90909	2	4.7	1.5	2.8
579	2	21	2	2	2	2	4	1	1	1	1	0	0	1	1	1	0	3	6	2	4	2	1.4	1	0.714286	1.90909	2	4.7	1.5	2.8
580	2	19	1	1	1	2	2	1	1	1	0	0	0	0	0	0	0	6	3	2	2.16667	2	2.3	2.33333	1.66667	2.63636	2.54545	3.8	3	3.2
581	2	19	1	1	1	2	2	1	1	1	0	0	0	0	0	0	0	6	3	2	2.16667	2	2.3	2.33333	1.66667	2.63636	2.54545	3.8	3	3.2
582	2	19	1	1	1	2	2	1	1	1	0	0	0	0	0	0	0	6	3	2	2.16667	2	2.3	2.33333	1.66667	2.63636	2.54545	3.8	3	3.2
584	2	19	1	1	1	2	2	1	1	1	0	0	0	0	0	0	0	6	3	2	2.16667	2	2.3	2.33333	1.66667	2.63636	2.54545	3.8	3	3.2
585	2	19	1	1	1	2	2	1	1	1	0	0	0	0	0	0	0	6	3	2	2.16667	2	2.3	2.33333	1.66667	2.63636	2.54545	3.8	3	3.2
586	2	19	1	1	1	2	2	1	1	1	0	0	0	0	0	0	0	6	3	2	2.16667	2	2.3	2.33333	1.66667	2.63636	2.54545	3.8	3	3.2
587	2	19	1	1	1	2	2	1	1	1	0	0	0	0	0	0	0	6	3	2	2.16667	2	2.3	2.33333	1.66667	2.63636	2.54545	3.8	3	3.2
588	2	19	1	1	1	2	2	1	1	1	0	0	0	0	0	0	0	6	3	2	2.16667	2	2.3	2.33333	1.66667	2.63636	2.54545	3.8	3	3.2
589	1	20	2	1	2	2	4	1	1	1	1	1	0	0	0	1	0	7	9	2	4	3	3.2	4	2.85714	3.45455	4.54545	5	4.41667	2.7
590	1	20	2	1	2	2	4	1	1	1	1	1	0	0	0	1	0	7	9	2	4	3	3.2	4	2.85714	3.45455	4.54545	5	4.41667	2.7
591	1	20	2	1	2	2	4	1	1	1	1	1	0	0	0	1	0	7	9	2	4	3	3.2	4	2.85714	3.45455	4.54545	5	4.41667	2.7
592	1	20	2	1	2	2	4	1	1	1	1	1	0	0	0	1	0	7	9	2	4	3	3.2	4	2.85714	3.45455	4.54545	5	4.41667	2.7
593	2	18	2	1	1	2	2	1	1	1	0	1	0	0	0	0	0	4	8	2	1.5	3.25	3.7	4.33333	3.09524	2.81818	1.72727	3.9	2.91667	4.6
594	2	18	2	1	1	2	2	1	1	1	0	1	0	0	0	0	0	4	8	2	1.5	3.25	3.7	4.33333	3.09524	2.81818	1.72727	3.9	2.91667	4.6
595	2	18	2	1	1	2	2	1	1	1	0	1	0	0	0	0	0	4	8	2	1.5	3.25	3.7	4.33333	3.09524	2.81818	1.72727	3.9	2.91667	4.6
596	2	18	2	1	1	2	2	1	1	1	0	1	0	0	0	0	0	4	8	2	1.5	3.25	3.7	4.33333	3.09524	2.81818	1.72727	3.9	2.91667	4.6
597	1	19	1	1	1	2	2	1	1	0	0	1	0	1	0	0	0	7	1	1	4.33333	2.25	2.8	3.11111	2.22222	3	3.63636	2.8	3.41667	2.2
598	1	19	1	1	1	2	2	1	1	0	0	1	0	1	0	0	0	7	1	1	4.33333	2.25	2.8	3.11111	2.22222	3	3.63636	2.8	3.41667	2.2
599	1	19	1	1	1	2	2	1	1	0	0	1	0	1	0	0	0	7	1	1	4.33333	2.25	2.8	3.11111	2.22222	3	3.63636	2.8	3.41667	2.2
600	1	19	1	1	1	2	2	1	1	0	0	1	0	1	0	0	0	7	1	1	4.33333	2.25	2.8	3.11111	2.22222	3	3.63636	2.8	3.41667	2.2
601	2	19	1	1	2	2	2	1	1	1	0	0	0	0	0	0	0	6	1	2	4	3.25	2.5	4	2.85714	3.09091	2.81818	2.9	3.83333	2.9
602	2	19	1	1	2	2	2	1	1	1	0	0	0	0	0	0	0	6	1	2	4	3.25	2.5	4	2.85714	3.09091	2.81818	2.9	3.83333	2.9
603	2	19	1	1	2	2	2	1	1	1	0	0	0	0	0	0	0	6	1	2	4	3.25	2.5	4	2.85714	3.09091	2.81818	2.9	3.83333	2.9
605	2	19	1	1	2	2	2	1	1	1	0	0	0	0	0	0	0	6	1	2	4	3.25	2.5	4	2.85714	3.09091	2.81818	2.9	3.83333	2.9
606	2	19	1	1	2	2	2	1	1	1	0	0	0	0	0	0	0	6	1	2	4	3.25	2.5	4	2.85714	3.09091	2.81818	2.9	3.83333	2.9
607	2	19	1	1	2	2	2	1	1	1	0	0	0	0	0	0	0	6	1	2	4	3.25	2.5	4	2.85714	3.09091	2.81818	2.9	3.83333	2.9
608	2	19	1	1	2	2	2	1	1	1	0	0	0	0	0	0	0	6	1	2	4	3.25	2.5	4	2.85714	3.09091	2.81818	2.9	3.83333	2.9
609	2	19	1	1	2	2	2	1	1	1	0	0	0	0	0	0	0	6	1	2	4	3.25	2.5	4	2.85714	3.09091	2.81818	2.9	3.83333	2.9
610	2	21	2	2	2	2	3	1	1	1	0	1	0	0	0	0	0	5	1	2	4.16667	3.5	3	4	2.85714	3.09091	2.63636	4.6	2.83333	3.3
611	2	21	2	2	2	2	3	1	1	1	0	1	0	0	0	0	0	5	1	2	4.16667	3.5	3	4	2.85714	3.09091	2.63636	4.6	2.83333	3.3
612	2	21	2	2	2	2	3	1	1	1	0	1	0	0	0	0	0	5	1	2	4.16667	3.5	3	4	2.85714	3.09091	2.63636	4.6	2.83333	3.3
613	2	21	2	2	2	2	3	1	1	1	0	1	0	0	0	0	0	5	1	2	4.16667	3.5	3	4	2.85714	3.09091	2.63636	4.6	2.83333	3.3
614	2	21	2	2	2	2	3	1	1	1	0	1	0	0	0	0	0	5	1	2	4.16667	3.5	3	4	2.85714	3.09091	2.63636	4.6	2.83333	3.3
615	2	21	2	2	2	2	3	1	1	1	0	1	0	0	0	0	0	5	1	2	4.16667	3.5	3	4	2.85714	3.09091	2.63636	4.6	2.83333	3.3
616	2	21	2	2	2	2	3	1	1	1	0	1	0	0	0	0	0	5	1	2	4.16667	3.5	3	4	2.85714	3.09091	2.63636	4.6	2.83333	3.3
617	2	21	2	2	2	2	3	1	1	1	0	1	0	0	0	0	0	5	1	2	4.16667	3.5	3	4	2.85714	3.09091	2.63636	4.6	2.83333	3.3
618	2	19	1	1	1	1	2	1	0	1	0	1	0	0	0	0	0	4	5	2	3	2.5	1.5	2.44444	1.74603	2.90909	2.90909	3.6	2.41667	3
619	2	19	1	1	1	1	2	1	0	1	0	1	0	0	0	0	0	4	5	2	3	2.5	1.5	2.44444	1.74603	2.90909	2.90909	3.6	2.41667	3
620	2	19	1	1	1	1	2	1	0	1	0	1	0	0	0	0	0	4	5	2	3	2.5	1.5	2.44444	1.74603	2.90909	2.90909	3.6	2.41667	3
621	2	19	1	1	1	1	2	1	0	1	0	1	0	0	0	0	0	4	5	2	3	2.5	1.5	2.44444	1.74603	2.90909	2.90909	3.6	2.41667	3
622	2	19	1	1	1	1	2	1	0	1	0	1	0	0	0	0	0	4	5	2	3	2.5	1.5	2.44444	1.74603	2.90909	2.90909	3.6	2.41667	3
623	2	19	1	1	1	1	2	1	0	1	0	1	0	0	0	0	0	4	5	2	3	2.5	1.5	2.44444	1.74603	2.90909	2.90909	3.6	2.41667	3
624	2	19	1	1	1	1	2	1	0	1	0	1	0	0	0	0	0	4	5	2	3	2.5	1.5	2.44444	1.74603	2.90909	2.90909	3.6	2.41667	3
626	2	19	1	1	1	1	2	1	0	1	0	1	0	0	0	0	0	4	5	2	3	2.5	1.5	2.44444	1.74603	2.90909	2.90909	3.6	2.41667	3
627	1	18	1	1	2	2	4	1	0	1	0	0	0	0	0	0	0	4	4	2	2	3.75	2.2	3.66667	2.61905	2.63636	3.54545	3.9	3.08333	2.8
628	1	18	1	1	2	2	4	1	0	1	0	0	0	0	0	0	0	4	4	2	2	3.75	2.2	3.66667	2.61905	2.63636	3.54545	3.9	3.08333	2.8
629	1	18	1	1	2	2	4	1	0	1	0	0	0	0	0	0	0	4	4	2	2	3.75	2.2	3.66667	2.61905	2.63636	3.54545	3.9	3.08333	2.8
630	1	18	1	1	2	2	4	1	0	1	0	0	0	0	0	0	0	4	4	2	2	3.75	2.2	3.66667	2.61905	2.63636	3.54545	3.9	3.08333	2.8
631	1	20	1	1	1	1	2	1	1	0	0	0	0	0	0	0	0	1	1	2	3.66667	2	3.7	1.33333	0.952381	3.63636	3.45455	4.4	3.41667	3.1
632	1	20	1	1	1	1	2	1	1	0	0	0	0	0	0	0	0	1	1	2	3.66667	2	3.7	1.33333	0.952381	3.63636	3.45455	4.4	3.41667	3.1
633	1	20	1	1	1	1	2	1	1	0	0	0	0	0	0	0	0	1	1	2	3.66667	2	3.7	1.33333	0.952381	3.63636	3.45455	4.4	3.41667	3.1
634	1	20	1	1	1	1	2	1	1	0	0	0	0	0	0	0	0	1	1	2	3.66667	2	3.7	1.33333	0.952381	3.63636	3.45455	4.4	3.41667	3.1
635	1	20	1	1	1	1	2	1	1	0	0	0	0	0	0	0	0	1	1	2	3.66667	2	3.7	1.33333	0.952381	3.63636	3.45455	4.4	3.41667	3.1
636	1	20	1	1	1	1	2	1	1	0	0	0	0	0	0	0	0	1	1	2	3.66667	2	3.7	1.33333	0.952381	3.63636	3.45455	4.4	3.41667	3.1
637	1	20	1	1	1	1	2	1	1	0	0	0	0	0	0	0	0	1	1	2	3.66667	2	3.7	1.33333	0.952381	3.63636	3.45455	4.4	3.41667	3.1
638	1	20	1	1	1	1	2	1	1	0	0	0	0	0	0	0	0	1	1	2	3.66667	2	3.7	1.33333	0.952381	3.63636	3.45455	4.4	3.41667	3.1
639	1	20	1	1	1	1	2	1	1	0	0	0	0	0	0	0	0	1	1	2	3.66667	2	3.7	1.33333	0.952381	3.63636	3.45455	4.4	3.41667	3.1
640	1	20	1	1	1	1	2	1	1	0	0	0	0	0	0	0	0	1	1	2	3.66667	2	3.7	1.33333	0.952381	3.63636	3.45455	4.4	3.41667	3.1
641	1	20	1	1	1	1	2	1	1	0	0	0	0	0	0	0	0	1	1	2	3.66667	2	3.7	1.33333	0.952381	3.63636	3.45455	4.4	3.41667	3.1
642	1	20	1	1	1	1	2	1	1	0	0	0	0	0	0	0	0	1	1	2	3.66667	2	3.7	1.33333	0.952381	3.63636	3.45455	4.4	3.41667	3.1
643	1	20	1	1	1	1	2	1	1	0	0	0	0	0	0	0	0	1	1	2	3.66667	2	3.7	1.33333	0.952381	3.63636	3.45455	4.4	3.41667	3.1
644	1	20	1	1	1	1	2	1	1	0	0	0	0	0	0	0	0	1	1	2	3.66667	2	3.7	1.33333	0.952381	3.63636	3.45455	4.4	3.41667	3.1
645	1	20	1	1	1	1	2	1	1	0	0	0	0	0	0	0	0	1	1	2	3.66667	2	3.7	1.33333	0.952381	3.63636	3.45455	4.4	3.41667	3.1
650	1	20	1	1	1	1	2	1	1	0	0	0	0	0	0	0	0	1	1	2	3.66667	2	3.7	1.33333	0.952381	3.63636	3.45455	4.4	3.41667	3.1
651	2	19	1	1	1	2	2	1	1	1	1	0	0	0	0	0	0	7	3	1	2	2.5	2.6	3.88889	2.77778	3.09091	3.27273	4	3.08333	3.2
652	2	19	1	1	1	2	2	1	1	1	1	0	0	0	0	0	0	7	3	1	2	2.5	2.6	3.88889	2.77778	3.09091	3.27273	4	3.08333	3.2
653	2	19	1	1	1	2	2	1	1	1	1	0	0	0	0	0	0	7	3	1	2	2.5	2.6	3.88889	2.77778	3.09091	3.27273	4	3.08333	3.2
654	2	19	1	1	1	2	2	1	1	1	1	0	0	0	0	0	0	7	3	1	2	2.5	2.6	3.88889	2.77778	3.09091	3.27273	4	3.08333	3.2
655	2	19	1	1	1	2	2	1	1	1	1	0	0	0	0	0	0	7	3	1	2	2.5	2.6	3.88889	2.77778	3.09091	3.27273	4	3.08333	3.2
656	2	19	1	1	1	2	2	1	1	1	1	0	0	0	0	0	0	7	3	1	2	2.5	2.6	3.88889	2.77778	3.09091	3.27273	4	3.08333	3.2
657	2	19	1	1	1	2	2	1	1	1	1	0	0	0	0	0	0	7	3	1	2	2.5	2.6	3.88889	2.77778	3.09091	3.27273	4	3.08333	3.2
658	2	19	1	1	1	2	2	1	1	1	1	0	0	0	0	0	0	7	3	1	2	2.5	2.6	3.88889	2.77778	3.09091	3.27273	4	3.08333	3.2
659	1	18	1	1	2	2	3	1	1	1	0	1	0	0	0	1	0	6	2	2	2	2	2.2	1.33333	0.952381	1.81818	3.90909	4.5	1.83333	3.4
660	1	18	1	1	2	2	3	1	1	1	0	1	0	0	0	1	0	6	2	2	2	2	2.2	1.33333	0.952381	1.81818	3.90909	4.5	1.83333	3.4
661	1	18	1	1	2	2	3	1	1	1	0	1	0	0	0	1	0	6	2	2	2	2	2.2	1.33333	0.952381	1.81818	3.90909	4.5	1.83333	3.4
662	1	18	1	1	2	2	3	1	1	1	0	1	0	0	0	1	0	6	2	2	2	2	2.2	1.33333	0.952381	1.81818	3.90909	4.5	1.83333	3.4
663	1	18	1	1	2	2	3	1	1	1	0	1	0	0	0	1	0	6	2	2	2	2	2.2	1.33333	0.952381	1.81818	3.90909	4.5	1.83333	3.4
664	1	18	1	1	2	2	3	1	1	1	0	1	0	0	0	1	0	6	2	2	2	2	2.2	1.33333	0.952381	1.81818	3.90909	4.5	1.83333	3.4
665	1	18	1	1	2	2	3	1	1	1	0	1	0	0	0	1	0	6	2	2	2	2	2.2	1.33333	0.952381	1.81818	3.90909	4.5	1.83333	3.4
666	1	18	1	1	2	2	3	1	1	1	0	1	0	0	0	1	0	6	2	2	2	2	2.2	1.33333	0.952381	1.81818	3.90909	4.5	1.83333	3.4
667	1	18	1	1	2	2	3	1	1	1	0	1	0	0	0	1	0	6	2	2	2	2	2.2	1.33333	0.952381	1.81818	3.90909	4.5	1.83333	3.4
668	1	18	1	1	2	2	3	1	1	1	0	1	0	0	0	1	0	6	2	2	2	2	2.2	1.33333	0.952381	1.81818	3.90909	4.5	1.83333	3.4
669	1	18	1	1	2	2	3	1	1	1	0	1	0	0	0	1	0	6	2	2	2	2	2.2	1.33333	0.952381	1.81818	3.90909	4.5	1.83333	3.4
672	1	18	1	1	2	2	3	1	1	1	0	1	0	0	0	1	0	6	2	2	2	2	2.2	1.33333	0.952381	1.81818	3.90909	4.5	1.83333	3.4
673	1	18	1	1	2	2	3	1	1	1	0	1	0	0	0	1	0	6	2	2	2	2	2.2	1.33333	0.952381	1.81818	3.90909	4.5	1.83333	3.4
674	1	18	1	1	2	2	3	1	1	1	0	1	0	0	0	1	0	6	2	2	2	2	2.2	1.33333	0.952381	1.81818	3.90909	4.5	1.83333	3.4
675	1	18	1	1	2	2	3	1	1	1	0	1	0	0	0	1	0	6	2	2	2	2	2.2	1.33333	0.952381	1.81818	3.90909	4.5	1.83333	3.4
678	1	18	1	1	2	2	3	1	1	1	0	1	0	0	0	1	0	6	2	2	2	2	2.2	1.33333	0.952381	1.81818	3.90909	4.5	1.83333	3.4
679	2	19	2	1	1	2	2	1	1	1	0	0	0	0	0	0	0	6	5	1	3.5	2.25	2.9	4	2.85714	3.63636	3.90909	3.8	4.08333	2.6
680	2	19	2	1	1	2	2	1	1	1	0	0	0	0	0	0	0	6	5	1	3.5	2.25	2.9	4	2.85714	3.63636	3.90909	3.8	4.08333	2.6
681	2	19	2	1	1	2	2	1	1	1	0	0	0	0	0	0	0	6	5	1	3.5	2.25	2.9	4	2.85714	3.63636	3.90909	3.8	4.08333	2.6
683	2	19	2	1	1	2	2	1	1	1	0	0	0	0	0	0	0	6	5	1	3.5	2.25	2.9	4	2.85714	3.63636	3.90909	3.8	4.08333	2.6
684	1	19	1	1	1	2	2	1	0	1	0	0	0	0	0	1	0	6	4	1	1.33333	3	2.5	1.33333	0.952381	3.36364	2.27273	4.4	2.33333	4.5
685	1	19	1	1	1	2	2	1	0	1	0	0	0	0	0	1	0	6	4	1	1.33333	3	2.5	1.33333	0.952381	3.36364	2.27273	4.4	2.33333	4.5
686	1	19	1	1	1	2	2	1	0	1	0	0	0	0	0	1	0	6	4	1	1.33333	3	2.5	1.33333	0.952381	3.36364	2.27273	4.4	2.33333	4.5
687	1	19	1	1	1	2	2	1	0	1	0	0	0	0	0	1	0	6	4	1	1.33333	3	2.5	1.33333	0.952381	3.36364	2.27273	4.4	2.33333	4.5
688	1	19	1	1	1	2	2	1	0	1	0	0	0	0	0	1	0	6	4	1	1.33333	3	2.5	1.33333	0.952381	3.36364	2.27273	4.4	2.33333	4.5
689	1	19	1	1	1	2	2	1	0	1	0	0	0	0	0	1	0	6	4	1	1.33333	3	2.5	1.33333	0.952381	3.36364	2.27273	4.4	2.33333	4.5
690	1	19	1	1	1	2	2	1	0	1	0	0	0	0	0	1	0	6	4	1	1.33333	3	2.5	1.33333	0.952381	3.36364	2.27273	4.4	2.33333	4.5
692	1	19	1	1	1	2	2	1	0	1	0	0	0	0	0	1	0	6	4	1	1.33333	3	2.5	1.33333	0.952381	3.36364	2.27273	4.4	2.33333	4.5
693	1	19	1	1	1	2	2	1	0	1	0	0	0	0	0	1	0	6	4	1	1.33333	3	2.5	1.33333	0.952381	3.36364	2.27273	4.4	2.33333	4.5
694	1	19	1	1	1	2	2	1	0	1	0	0	0	0	0	1	0	6	4	1	1.33333	3	2.5	1.33333	0.952381	3.36364	2.27273	4.4	2.33333	4.5
695	1	19	1	1	1	2	2	1	0	1	0	0	0	0	0	1	0	6	4	1	1.33333	3	2.5	1.33333	0.952381	3.36364	2.27273	4.4	2.33333	4.5
696	1	19	1	1	1	2	2	1	0	1	0	0	0	0	0	1	0	6	4	1	1.33333	3	2.5	1.33333	0.952381	3.36364	2.27273	4.4	2.33333	4.5
697	1	19	1	1	1	2	2	1	0	1	0	0	0	0	0	1	0	6	4	1	1.33333	3	2.5	1.33333	0.952381	3.36364	2.27273	4.4	2.33333	4.5
698	1	19	1	1	1	2	2	1	0	1	0	0	0	0	0	1	0	6	4	1	1.33333	3	2.5	1.33333	0.952381	3.36364	2.27273	4.4	2.33333	4.5
699	1	19	1	1	1	2	2	1	0	1	0	0	0	0	0	1	0	6	4	1	1.33333	3	2.5	1.33333	0.952381	3.36364	2.27273	4.4	2.33333	4.5
702	1	19	1	1	1	2	2	1	0	1	0	0	0	0	0	1	0	6	4	1	1.33333	3	2.5	1.33333	0.952381	3.36364	2.27273	4.4	2.33333	4.5
703	2	20	2	2	1	1	2	1	1	1	0	1	0	0	0	0	0	3	5	2	1.83333	3.25	2.5	3.11111	2.22222	2.90909	2.90909	3.9	1.58333	2.7
704	2	20	2	2	1	1	2	1	1	1	0	1	0	0	0	0	0	3	5	2	1.83333	3.25	2.5	3.11111	2.22222	2.90909	2.90909	3.9	1.58333	2.7
705	2	20	2	2	1	1	2	1	1	1	0	1	0	0	0	0	0	3	5	2	1.83333	3.25	2.5	3.11111	2.22222	2.90909	2.90909	3.9	1.58333	2.7
707	2	20	2	2	1	1	2	1	1	1	0	1	0	0	0	0	0	3	5	2	1.83333	3.25	2.5	3.11111	2.22222	2.90909	2.90909	3.9	1.58333	2.7
708	2	19	1	1	2	2	3	1	1	1	0	1	0	0	0	1	0	6	8	1	4.83333	3.75	2.9	4.33333	3.09524	3.90909	3.54545	4	3.5	3.3
709	2	19	1	1	2	2	3	1	1	1	0	1	0	0	0	1	0	6	8	1	4.83333	3.75	2.9	4.33333	3.09524	3.90909	3.54545	4	3.5	3.3
710	2	19	1	1	2	2	3	1	1	1	0	1	0	0	0	1	0	6	8	1	4.83333	3.75	2.9	4.33333	3.09524	3.90909	3.54545	4	3.5	3.3
711	2	19	1	1	2	2	3	1	1	1	0	1	0	0	0	1	0	6	8	1	4.83333	3.75	2.9	4.33333	3.09524	3.90909	3.54545	4	3.5	3.3
712	2	21	2	2	1	1	3	1	0	1	0	0	0	0	0	0	0	6	7	2	4	3	3	4	2.85714	3	3	3	3	3
713	2	21	2	2	1	1	3	1	0	1	0	0	0	0	0	0	0	6	7	2	4	3	3	4	2.85714	3	3	3	3	3
714	2	21	2	2	1	1	3	1	0	1	0	0	0	0	0	0	0	6	7	2	4	3	3	4	2.85714	3	3	3	3	3
717	2	21	2	2	1	1	3	1	0	1	0	0	0	0	0	0	0	6	7	2	4	3	3	4	2.85714	3	3	3	3	3
718	1	19	2	1	1	2	3	1	1	0	0	1	0	0	0	0	0	3	6	1	2	2.25	1.9	1.88889	1.34921	2.36364	1.81818	4.2	1.91667	4
719	1	19	2	1	1	2	3	1	1	0	0	1	0	0	0	0	0	3	6	1	2	2.25	1.9	1.88889	1.34921	2.36364	1.81818	4.2	1.91667	4
720	1	19	2	1	1	2	3	1	1	0	0	1	0	0	0	0	0	3	6	1	2	2.25	1.9	1.88889	1.34921	2.36364	1.81818	4.2	1.91667	4
723	1	19	2	1	1	2	3	1	1	0	0	1	0	0	0	0	0	3	6	1	2	2.25	1.9	1.88889	1.34921	2.36364	1.81818	4.2	1.91667	4
724	1	19	2	1	1	2	3	1	1	0	0	1	0	0	0	0	0	3	6	1	2	2.25	1.9	1.88889	1.34921	2.36364	1.81818	4.2	1.91667	4
725	1	19	2	1	1	2	3	1	1	0	0	1	0	0	0	0	0	3	6	1	2	2.25	1.9	1.88889	1.34921	2.36364	1.81818	4.2	1.91667	4
726	1	19	2	1	1	2	3	1	1	0	0	1	0	0	0	0	0	3	6	1	2	2.25	1.9	1.88889	1.34921	2.36364	1.81818	4.2	1.91667	4
729	1	19	2	1	1	2	3	1	1	0	0	1	0	0	0	0	0	3	6	1	2	2.25	1.9	1.88889	1.34921	2.36364	1.81818	4.2	1.91667	4
730	1	19	1	1	1	2	4	1	1	1	0	0	0	0	0	0	0	7	7	2	2	2.5	2	3.33333	2.38095	2.09091	2.72727	4	3.08333	3.3
731	1	19	1	1	1	2	4	1	1	1	0	0	0	0	0	0	0	7	7	2	2	2.5	2	3.33333	2.38095	2.09091	2.72727	4	3.08333	3.3
732	1	19	1	1	1	2	4	1	1	1	0	0	0	0	0	0	0	7	7	2	2	2.5	2	3.33333	2.38095	2.09091	2.72727	4	3.08333	3.3
735	1	19	1	1	1	2	4	1	1	1	0	0	0	0	0	0	0	7	7	2	2	2.5	2	3.33333	2.38095	2.09091	2.72727	4	3.08333	3.3
736	1	19	1	1	1	2	4	1	1	1	0	0	0	0	0	0	0	7	7	2	2	2.5	2	3.33333	2.38095	2.09091	2.72727	4	3.08333	3.3
737	1	19	1	1	1	2	4	1	1	1	0	0	0	0	0	0	0	7	7	2	2	2.5	2	3.33333	2.38095	2.09091	2.72727	4	3.08333	3.3
738	1	19	1	1	1	2	4	1	1	1	0	0	0	0	0	0	0	7	7	2	2	2.5	2	3.33333	2.38095	2.09091	2.72727	4	3.08333	3.3
740	1	19	1	1	1	2	4	1	1	1	0	0	0	0	0	0	0	7	7	2	2	2.5	2	3.33333	2.38095	2.09091	2.72727	4	3.08333	3.3
741	1	19	2	1	1	2	3	1	1	0	0	1	0	0	0	0	0	3	6	1	2	2.25	1.9	1.88889	1.34921	2.36364	1.81818	4.2	1.91667	4
742	1	19	2	1	1	2	3	1	1	0	0	1	0	0	0	0	0	3	6	1	2	2.25	1.9	1.88889	1.34921	2.36364	1.81818	4.2	1.91667	4
743	1	19	2	1	1	2	3	1	1	0	0	1	0	0	0	0	0	3	6	1	2	2.25	1.9	1.88889	1.34921	2.36364	1.81818	4.2	1.91667	4
744	1	19	2	1	1	2	3	1	1	0	0	1	0	0	0	0	0	3	6	1	2	2.25	1.9	1.88889	1.34921	2.36364	1.81818	4.2	1.91667	4
745	1	19	2	1	1	2	3	1	1	0	0	1	0	0	0	0	0	3	6	1	2	2.25	1.9	1.88889	1.34921	2.36364	1.81818	4.2	1.91667	4
746	1	19	2	1	1	2	3	1	1	0	0	1	0	0	0	0	0	3	6	1	2	2.25	1.9	1.88889	1.34921	2.36364	1.81818	4.2	1.91667	4
747	1	19	2	1	1	2	3	1	1	0	0	1	0	0	0	0	0	3	6	1	2	2.25	1.9	1.88889	1.34921	2.36364	1.81818	4.2	1.91667	4
753	1	19	2	1	1	2	3	1	1	0	0	1	0	0	0	0	0	3	6	1	2	2.25	1.9	1.88889	1.34921	2.36364	1.81818	4.2	1.91667	4
754	2	20	1	1	1	1	2	1	1	1	0	0	0	0	0	0	0	7	7	2	3.5	3.5	2.4	2	1.42857	3.36364	2.27273	4.9	2.66667	4.4
755	2	20	1	1	1	1	2	1	1	1	0	0	0	0	0	0	0	7	7	2	3.5	3.5	2.4	2	1.42857	3.36364	2.27273	4.9	2.66667	4.4
756	2	20	1	1	1	1	2	1	1	1	0	0	0	0	0	0	0	7	7	2	3.5	3.5	2.4	2	1.42857	3.36364	2.27273	4.9	2.66667	4.4
759	2	20	1	1	1	1	2	1	1	1	0	0	0	0	0	0	0	7	7	2	3.5	3.5	2.4	2	1.42857	3.36364	2.27273	4.9	2.66667	4.4
760	2	20	1	1	1	1	2	1	1	1	0	0	0	0	0	0	0	7	7	2	3.5	3.5	2.4	2	1.42857	3.36364	2.27273	4.9	2.66667	4.4
761	2	20	1	1	1	1	2	1	1	1	0	0	0	0	0	0	0	7	7	2	3.5	3.5	2.4	2	1.42857	3.36364	2.27273	4.9	2.66667	4.4
762	2	20	1	1	1	1	2	1	1	1	0	0	0	0	0	0	0	7	7	2	3.5	3.5	2.4	2	1.42857	3.36364	2.27273	4.9	2.66667	4.4
765	2	20	1	1	1	1	2	1	1	1	0	0	0	0	0	0	0	7	7	2	3.5	3.5	2.4	2	1.42857	3.36364	2.27273	4.9	2.66667	4.4
766	1	18	1	1	2	2	2	1	1	1	0	0	0	0	0	0	0	3	3	2	4.66667	2.25	2.2	3.44444	2.46032	3.18182	2.27273	3.1	2.25	3.3
767	1	18	1	1	2	2	2	1	1	1	0	0	0	0	0	0	0	3	3	2	4.66667	2.25	2.2	3.44444	2.46032	3.18182	2.27273	3.1	2.25	3.3
768	1	18	1	1	2	2	2	1	1	1	0	0	0	0	0	0	0	3	3	2	4.66667	2.25	2.2	3.44444	2.46032	3.18182	2.27273	3.1	2.25	3.3
771	1	18	1	1	2	2	2	1	1	1	0	0	0	0	0	0	0	3	3	2	4.66667	2.25	2.2	3.44444	2.46032	3.18182	2.27273	3.1	2.25	3.3
772	1	18	1	1	2	2	2	1	1	1	0	0	0	0	0	0	0	3	3	2	4.66667	2.25	2.2	3.44444	2.46032	3.18182	2.27273	3.1	2.25	3.3
773	1	18	1	1	2	2	2	1	1	1	0	0	0	0	0	0	0	3	3	2	4.66667	2.25	2.2	3.44444	2.46032	3.18182	2.27273	3.1	2.25	3.3
774	1	18	1	1	2	2	2	1	1	1	0	0	0	0	0	0	0	3	3	2	4.66667	2.25	2.2	3.44444	2.46032	3.18182	2.27273	3.1	2.25	3.3
775	1	18	1	1	2	2	2	1	1	1	0	0	0	0	0	0	0	3	3	2	4.66667	2.25	2.2	3.44444	2.46032	3.18182	2.27273	3.1	2.25	3.3
776	2	18	1	1	1	2	3	1	1	1	1	0	0	0	0	0	0	4	1	2	5.33333	3.25	2.9	3.66667	2.61905	3.81818	3.36364	3.8	2.91667	2.8
777	2	18	1	1	1	2	3	1	1	1	1	0	0	0	0	0	0	4	1	2	5.33333	3.25	2.9	3.66667	2.61905	3.81818	3.36364	3.8	2.91667	2.8
778	2	18	1	1	1	2	3	1	1	1	1	0	0	0	0	0	0	4	1	2	5.33333	3.25	2.9	3.66667	2.61905	3.81818	3.36364	3.8	2.91667	2.8
779	2	18	1	1	1	2	3	1	1	1	1	0	0	0	0	0	0	4	1	2	5.33333	3.25	2.9	3.66667	2.61905	3.81818	3.36364	3.8	2.91667	2.8
780	2	18	1	1	1	2	3	1	1	1	1	0	0	0	0	0	0	4	1	2	5.33333	3.25	2.9	3.66667	2.61905	3.81818	3.36364	3.8	2.91667	2.8
781	2	18	1	1	1	2	3	1	1	1	1	0	0	0	0	0	0	4	1	2	5.33333	3.25	2.9	3.66667	2.61905	3.81818	3.36364	3.8	2.91667	2.8
782	2	18	1	1	1	2	3	1	1	1	1	0	0	0	0	0	0	4	1	2	5.33333	3.25	2.9	3.66667	2.61905	3.81818	3.36364	3.8	2.91667	2.8
783	2	18	1	1	1	2	3	1	1	1	1	0	0	0	0	0	0	4	1	2	5.33333	3.25	2.9	3.66667	2.61905	3.81818	3.36364	3.8	2.91667	2.8
784	1	21	2	2	1	2	2	1	1	0	0	1	0	0	0	0	1	3	1	2	1.83333	2.75	2.2	3.55556	2.53968	3.36364	2.63636	3.8	2.83333	3.8
785	1	21	2	2	1	2	2	1	1	0	0	1	0	0	0	0	1	3	1	2	1.83333	2.75	2.2	3.55556	2.53968	3.36364	2.63636	3.8	2.83333	3.8
786	1	21	2	2	1	2	2	1	1	0	0	1	0	0	0	0	1	3	1	2	1.83333	2.75	2.2	3.55556	2.53968	3.36364	2.63636	3.8	2.83333	3.8
792	1	21	2	2	1	2	2	1	1	0	0	1	0	0	0	0	1	3	1	2	1.83333	2.75	2.2	3.55556	2.53968	3.36364	2.63636	3.8	2.83333	3.8
793	2	19	1	1	1	2	2	1	0	1	0	0	0	0	0	0	1	3	2	2	1	2.75	2.6	1.33333	0.952381	2.63636	4.63636	2.3	4.25	2.8
794	2	19	1	1	1	2	2	1	0	1	0	0	0	0	0	0	1	3	2	2	1	2.75	2.6	1.33333	0.952381	2.63636	4.63636	2.3	4.25	2.8
795	2	19	1	1	1	2	2	1	0	1	0	0	0	0	0	0	1	3	2	2	1	2.75	2.6	1.33333	0.952381	2.63636	4.63636	2.3	4.25	2.8
797	2	19	1	1	1	2	2	1	0	1	0	0	0	0	0	0	1	3	2	2	1	2.75	2.6	1.33333	0.952381	2.63636	4.63636	2.3	4.25	2.8
798	2	19	1	1	1	2	2	1	0	1	0	0	0	0	0	0	1	3	2	2	1	2.75	2.6	1.33333	0.952381	2.63636	4.63636	2.3	4.25	2.8
799	2	19	1	1	1	2	2	1	0	1	0	0	0	0	0	0	1	3	2	2	1	2.75	2.6	1.33333	0.952381	2.63636	4.63636	2.3	4.25	2.8
800	2	19	1	1	1	2	2	1	0	1	0	0	0	0	0	0	1	3	2	2	1	2.75	2.6	1.33333	0.952381	2.63636	4.63636	2.3	4.25	2.8
801	2	19	1	1	1	2	2	1	0	1	0	0	0	0	0	0	1	3	2	2	1	2.75	2.6	1.33333	0.952381	2.63636	4.63636	2.3	4.25	2.8
802	2	19	1	1	1	2	2	1	0	1	0	0	0	0	0	0	1	3	2	2	1	2.75	2.6	1.33333	0.952381	2.63636	4.63636	2.3	4.25	2.8
803	2	19	1	1	1	2	2	1	0	1	0	0	0	0	0	0	1	3	2	2	1	2.75	2.6	1.33333	0.952381	2.63636	4.63636	2.3	4.25	2.8
804	2	19	1	1	1	2	2	1	0	1	0	0	0	0	0	0	1	3	2	2	1	2.75	2.6	1.33333	0.952381	2.63636	4.63636	2.3	4.25	2.8
808	2	19	1	1	1	2	2	1	0	1	0	0	0	0	0	0	1	3	2	2	1	2.75	2.6	1.33333	0.952381	2.63636	4.63636	2.3	4.25	2.8
809	2	19	1	1	1	2	2	1	0	1	0	0	0	0	0	0	1	3	2	2	1	2.75	2.6	1.33333	0.952381	2.63636	4.63636	2.3	4.25	2.8
810	2	19	1	1	1	2	2	1	0	1	0	0	0	0	0	0	1	3	2	2	1	2.75	2.6	1.33333	0.952381	2.63636	4.63636	2.3	4.25	2.8
811	2	19	1	1	1	2	2	1	0	1	0	0	0	0	0	0	1	3	2	2	1	2.75	2.6	1.33333	0.952381	2.63636	4.63636	2.3	4.25	2.8
812	2	19	1	1	1	2	2	1	0	1	0	0	0	0	0	0	1	3	2	2	1	2.75	2.6	1.33333	0.952381	2.63636	4.63636	2.3	4.25	2.8
813	2	20	1	1	2	2	2	1	1	1	0	0	0	0	0	0	0	7	1	2	1.66667	2	2.5	3.88889	2.77778	3.45455	3	4.8	3.25	3.7
814	2	20	1	1	2	2	2	1	1	1	0	0	0	0	0	0	0	7	1	2	1.66667	2	2.5	3.88889	2.77778	3.45455	3	4.8	3.25	3.7
815	2	20	1	1	2	2	2	1	1	1	0	0	0	0	0	0	0	7	1	2	1.66667	2	2.5	3.88889	2.77778	3.45455	3	4.8	3.25	3.7
816	2	20	1	1	2	2	2	1	1	1	0	0	0	0	0	0	0	7	1	2	1.66667	2	2.5	3.88889	2.77778	3.45455	3	4.8	3.25	3.7
817	2	20	1	1	2	2	2	1	1	1	0	0	0	0	0	0	0	7	1	2	1.66667	2	2.5	3.88889	2.77778	3.45455	3	4.8	3.25	3.7
818	2	20	1	1	2	2	2	1	1	1	0	0	0	0	0	0	0	7	1	2	1.66667	2	2.5	3.88889	2.77778	3.45455	3	4.8	3.25	3.7
819	2	20	1	1	2	2	2	1	1	1	0	0	0	0	0	0	0	7	1	2	1.66667	2	2.5	3.88889	2.77778	3.45455	3	4.8	3.25	3.7
821	2	20	1	1	2	2	2	1	1	1	0	0	0	0	0	0	0	7	1	2	1.66667	2	2.5	3.88889	2.77778	3.45455	3	4.8	3.25	3.7
822	2	18	1	1	1	1	2	1	1	1	0	1	0	0	0	0	0	4	3	1	1.83333	2.75	2.5	3	2.14286	3	3.45455	2.6	3.08333	1.2
823	2	18	1	1	1	1	2	1	1	1	0	1	0	0	0	0	0	4	3	1	1.83333	2.75	2.5	3	2.14286	3	3.45455	2.6	3.08333	1.2
824	2	18	1	1	1	1	2	1	1	1	0	1	0	0	0	0	0	4	3	1	1.83333	2.75	2.5	3	2.14286	3	3.45455	2.6	3.08333	1.2
825	2	18	1	1	1	1	2	1	1	1	0	1	0	0	0	0	0	4	3	1	1.83333	2.75	2.5	3	2.14286	3	3.45455	2.6	3.08333	1.2
826	2	18	1	1	1	1	2	1	1	1	0	1	0	0	0	0	0	4	3	1	1.83333	2.75	2.5	3	2.14286	3	3.45455	2.6	3.08333	1.2
827	2	18	1	1	1	1	2	1	1	1	0	1	0	0	0	0	0	4	3	1	1.83333	2.75	2.5	3	2.14286	3	3.45455	2.6	3.08333	1.2
828	2	18	1	1	1	1	2	1	1	1	0	1	0	0	0	0	0	4	3	1	1.83333	2.75	2.5	3	2.14286	3	3.45455	2.6	3.08333	1.2
831	2	18	1	1	1	1	2	1	1	1	0	1	0	0	0	0	0	4	3	1	1.83333	2.75	2.5	3	2.14286	3	3.45455	2.6	3.08333	1.2
832	2	19	2	2	1	2	4	1	1	1	0	0	0	0	0	0	0	7	9	2	4.33333	3	3	3.88889	2.77778	2.72727	2.72727	3.2	3.16667	3.1
833	2	19	2	2	1	2	4	1	1	1	0	0	0	0	0	0	0	7	9	2	4.33333	3	3	3.88889	2.77778	2.72727	2.72727	3.2	3.16667	3.1
834	2	19	2	2	1	2	4	1	1	1	0	0	0	0	0	0	0	7	9	2	4.33333	3	3	3.88889	2.77778	2.72727	2.72727	3.2	3.16667	3.1
836	2	19	2	2	1	2	4	1	1	1	0	0	0	0	0	0	0	7	9	2	4.33333	3	3	3.88889	2.77778	2.72727	2.72727	3.2	3.16667	3.1
837	1	20	1	1	1	2	4	1	1	1	0	0	0	0	0	0	0	7	9	2	4	2.5	3	2.66667	1.90476	3.63636	2.72727	4.2	4.5	3.7
838	1	20	1	1	1	2	4	1	1	1	0	0	0	0	0	0	0	7	9	2	4	2.5	3	2.66667	1.90476	3.63636	2.72727	4.2	4.5	3.7
839	1	20	1	1	1	2	4	1	1	1	0	0	0	0	0	0	0	7	9	2	4	2.5	3	2.66667	1.90476	3.63636	2.72727	4.2	4.5	3.7
840	1	20	1	1	1	2	4	1	1	1	0	0	0	0	0	0	0	7	9	2	4	2.5	3	2.66667	1.90476	3.63636	2.72727	4.2	4.5	3.7
841	1	20	1	1	1	2	4	1	1	1	0	0	0	0	0	0	0	7	9	2	4	2.5	3	2.66667	1.90476	3.63636	2.72727	4.2	4.5	3.7
842	1	20	1	1	1	2	4	1	1	1	0	0	0	0	0	0	0	7	9	2	4	2.5	3	2.66667	1.90476	3.63636	2.72727	4.2	4.5	3.7
843	1	20	1	1	1	2	4	1	1	1	0	0	0	0	0	0	0	7	9	2	4	2.5	3	2.66667	1.90476	3.63636	2.72727	4.2	4.5	3.7
846	1	20	1	1	1	2	4	1	1	1	0	0	0	0	0	0	0	7	9	2	4	2.5	3	2.66667	1.90476	3.63636	2.72727	4.2	4.5	3.7
847	2	19	1	1	2	2	2	1	1	1	0	1	1	0	0	1	0	7	4	1	2.83333	4.25	2.3	3.77778	2.69841	3.27273	3.72727	3.9	4.08333	2.6
848	2	19	1	1	2	2	2	1	1	1	0	1	1	0	0	1	0	7	4	1	2.83333	4.25	2.3	3.77778	2.69841	3.27273	3.72727	3.9	4.08333	2.6
849	2	19	1	1	2	2	2	1	1	1	0	1	1	0	0	1	0	7	4	1	2.83333	4.25	2.3	3.77778	2.69841	3.27273	3.72727	3.9	4.08333	2.6
850	2	19	1	1	2	2	2	1	1	1	0	1	1	0	0	1	0	7	4	1	2.83333	4.25	2.3	3.77778	2.69841	3.27273	3.72727	3.9	4.08333	2.6
851	2	19	1	1	1	2	3	1	1	1	0	1	0	0	0	0	0	6	4	2	2	3.5	2.4	3.33333	2.38095	2.81818	2.81818	3.7	3.16667	3.6
852	2	19	1	1	1	2	3	1	1	1	0	1	0	0	0	0	0	6	4	2	2	3.5	2.4	3.33333	2.38095	2.81818	2.81818	3.7	3.16667	3.6
853	2	19	1	1	1	2	3	1	1	1	0	1	0	0	0	0	0	6	4	2	2	3.5	2.4	3.33333	2.38095	2.81818	2.81818	3.7	3.16667	3.6
854	2	19	1	1	1	2	3	1	1	1	0	1	0	0	0	0	0	6	4	2	2	3.5	2.4	3.33333	2.38095	2.81818	2.81818	3.7	3.16667	3.6
855	2	19	1	1	1	2	3	1	1	1	0	1	0	0	0	0	0	6	4	2	2	3.5	2.4	3.33333	2.38095	2.81818	2.81818	3.7	3.16667	3.6
856	2	19	1	1	1	2	3	1	1	1	0	1	0	0	0	0	0	6	4	2	2	3.5	2.4	3.33333	2.38095	2.81818	2.81818	3.7	3.16667	3.6
857	2	19	1	1	1	2	3	1	1	1	0	1	0	0	0	0	0	6	4	2	2	3.5	2.4	3.33333	2.38095	2.81818	2.81818	3.7	3.16667	3.6
858	2	19	1	1	1	2	3	1	1	1	0	1	0	0	0	0	0	6	4	2	2	3.5	2.4	3.33333	2.38095	2.81818	2.81818	3.7	3.16667	3.6
859	1	19	1	1	1	2	3	1	1	1	1	0	0	1	0	0	0	3	4	2	2	3	1.9	2.66667	1.90476	3.54545	3	4.2	2.33333	4.6
860	1	19	1	1	1	2	3	1	1	1	1	0	0	1	0	0	0	3	4	2	2	3	1.9	2.66667	1.90476	3.54545	3	4.2	2.33333	4.6
861	1	19	1	1	1	2	3	1	1	1	1	0	0	1	0	0	0	3	4	2	2	3	1.9	2.66667	1.90476	3.54545	3	4.2	2.33333	4.6
864	1	19	1	1	1	2	3	1	1	1	1	0	0	1	0	0	0	3	4	2	2	3	1.9	2.66667	1.90476	3.54545	3	4.2	2.33333	4.6
865	1	19	1	1	1	2	3	1	1	1	1	0	0	1	0	0	0	3	4	2	2	3	1.9	2.66667	1.90476	3.54545	3	4.2	2.33333	4.6
866	1	19	1	1	1	2	3	1	1	1	1	0	0	1	0	0	0	3	4	2	2	3	1.9	2.66667	1.90476	3.54545	3	4.2	2.33333	4.6
867	1	19	1	1	1	2	3	1	1	1	1	0	0	1	0	0	0	3	4	2	2	3	1.9	2.66667	1.90476	3.54545	3	4.2	2.33333	4.6
870	1	19	1	1	1	2	3	1	1	1	1	0	0	1	0	0	0	3	4	2	2	3	1.9	2.66667	1.90476	3.54545	3	4.2	2.33333	4.6
871	2	19	1	1	2	2	3	1	1	1	0	0	0	0	0	0	0	3	5	1	3.33333	3.75	2.7	2.44444	1.74603	3.81818	3.72727	4	3.66667	2
872	2	19	1	1	2	2	3	1	1	1	0	0	0	0	0	0	0	3	5	1	3.33333	3.75	2.7	2.44444	1.74603	3.81818	3.72727	4	3.66667	2
873	2	19	1	1	2	2	3	1	1	1	0	0	0	0	0	0	0	3	5	1	3.33333	3.75	2.7	2.44444	1.74603	3.81818	3.72727	4	3.66667	2
875	2	19	1	1	2	2	3	1	1	1	0	0	0	0	0	0	0	3	5	1	3.33333	3.75	2.7	2.44444	1.74603	3.81818	3.72727	4	3.66667	2
876	2	19	1	1	2	2	3	1	1	1	0	0	0	0	0	0	0	3	5	1	3.33333	3.75	2.7	2.44444	1.74603	3.81818	3.72727	4	3.66667	2
877	2	19	1	1	2	2	3	1	1	1	0	0	0	0	0	0	0	3	5	1	3.33333	3.75	2.7	2.44444	1.74603	3.81818	3.72727	4	3.66667	2
878	2	19	1	1	2	2	3	1	1	1	0	0	0	0	0	0	0	3	5	1	3.33333	3.75	2.7	2.44444	1.74603	3.81818	3.72727	4	3.66667	2
879	2	19	1	1	2	2	3	1	1	1	0	0	0	0	0	0	0	3	5	1	3.33333	3.75	2.7	2.44444	1.74603	3.81818	3.72727	4	3.66667	2
880	2	19	1	1	2	1	4	1	1	0	1	1	0	0	0	1	0	4	6	1	5.16667	3.25	2.5	3.66667	2.61905	3.45455	3	4.4	2.75	3.8
881	2	19	1	1	2	1	4	1	1	0	1	1	0	0	0	1	0	4	6	1	5.16667	3.25	2.5	3.66667	2.61905	3.45455	3	4.4	2.75	3.8
882	2	19	1	1	2	1	4	1	1	0	1	1	0	0	0	1	0	4	6	1	5.16667	3.25	2.5	3.66667	2.61905	3.45455	3	4.4	2.75	3.8
885	2	19	1	1	2	1	4	1	1	0	1	1	0	0	0	1	0	4	6	1	5.16667	3.25	2.5	3.66667	2.61905	3.45455	3	4.4	2.75	3.8
886	2	19	1	1	2	1	4	1	1	0	1	1	0	0	0	1	0	4	6	1	5.16667	3.25	2.5	3.66667	2.61905	3.45455	3	4.4	2.75	3.8
887	2	19	1	1	2	1	4	1	1	0	1	1	0	0	0	1	0	4	6	1	5.16667	3.25	2.5	3.66667	2.61905	3.45455	3	4.4	2.75	3.8
888	2	19	1	1	2	1	4	1	1	0	1	1	0	0	0	1	0	4	6	1	5.16667	3.25	2.5	3.66667	2.61905	3.45455	3	4.4	2.75	3.8
890	2	19	1	1	2	1	4	1	1	0	1	1	0	0	0	1	0	4	6	1	5.16667	3.25	2.5	3.66667	2.61905	3.45455	3	4.4	2.75	3.8
891	1	19	1	1	2	2	3	1	1	1	1	1	0	0	0	1	0	4	9	2	4.16667	3.25	2.4	3	2.14286	3.45455	3.63636	3.8	3.75	3
892	1	19	1	1	2	2	3	1	1	1	1	1	0	0	0	1	0	4	9	2	4.16667	3.25	2.4	3	2.14286	3.45455	3.63636	3.8	3.75	3
893	1	19	1	1	2	2	3	1	1	1	1	1	0	0	0	1	0	4	9	2	4.16667	3.25	2.4	3	2.14286	3.45455	3.63636	3.8	3.75	3
894	1	19	1	1	2	2	3	1	1	1	1	1	0	0	0	1	0	4	9	2	4.16667	3.25	2.4	3	2.14286	3.45455	3.63636	3.8	3.75	3
895	1	19	1	1	2	2	3	1	1	1	1	1	0	0	0	1	0	4	9	2	4.16667	3.25	2.4	3	2.14286	3.45455	3.63636	3.8	3.75	3
896	1	19	1	1	2	2	3	1	1	1	1	1	0	0	0	1	0	4	9	2	4.16667	3.25	2.4	3	2.14286	3.45455	3.63636	3.8	3.75	3
897	1	19	1	1	2	2	3	1	1	1	1	1	0	0	0	1	0	4	9	2	4.16667	3.25	2.4	3	2.14286	3.45455	3.63636	3.8	3.75	3
899	1	19	1	1	2	2	3	1	1	1	1	1	0	0	0	1	0	4	9	2	4.16667	3.25	2.4	3	2.14286	3.45455	3.63636	3.8	3.75	3
900	2	19	2	2	1	2	2	1	1	0	0	1	0	0	0	0	0	5	2	2	4.5	3.25	3.3	3.33333	2.38095	3	3	3.6	3	2.8
901	2	19	2	2	1	2	2	1	1	0	0	1	0	0	0	0	0	5	2	2	4.5	3.25	3.3	3.33333	2.38095	3	3	3.6	3	2.8
902	2	19	2	2	1	2	2	1	1	0	0	1	0	0	0	0	0	5	2	2	4.5	3.25	3.3	3.33333	2.38095	3	3	3.6	3	2.8
903	2	19	2	2	1	2	2	1	1	0	0	1	0	0	0	0	0	5	2	2	4.5	3.25	3.3	3.33333	2.38095	3	3	3.6	3	2.8
904	1	20	1	1	1	1	3	1	1	1	0	0	0	0	0	0	0	2	1	2	3.16667	2.5	2.6	1.55556	1.11111	2.90909	3.63636	3.9	3.75	3.3
905	1	20	1	1	1	1	3	1	1	1	0	0	0	0	0	0	0	2	1	2	3.16667	2.5	2.6	1.55556	1.11111	2.90909	3.63636	3.9	3.75	3.3
906	1	20	1	1	1	1	3	1	1	1	0	0	0	0	0	0	0	2	1	2	3.16667	2.5	2.6	1.55556	1.11111	2.90909	3.63636	3.9	3.75	3.3
908	1	20	1	1	1	1	3	1	1	1	0	0	0	0	0	0	0	2	1	2	3.16667	2.5	2.6	1.55556	1.11111	2.90909	3.63636	3.9	3.75	3.3
909	1	20	1	1	1	1	3	1	1	1	0	0	0	0	0	0	0	2	1	2	3.16667	2.5	2.6	1.55556	1.11111	2.90909	3.63636	3.9	3.75	3.3
910	1	20	1	1	1	1	3	1	1	1	0	0	0	0	0	0	0	2	1	2	3.16667	2.5	2.6	1.55556	1.11111	2.90909	3.63636	3.9	3.75	3.3
911	1	20	1	1	1	1	3	1	1	1	0	0	0	0	0	0	0	2	1	2	3.16667	2.5	2.6	1.55556	1.11111	2.90909	3.63636	3.9	3.75	3.3
912	1	20	1	1	1	1	3	1	1	1	0	0	0	0	0	0	0	2	1	2	3.16667	2.5	2.6	1.55556	1.11111	2.90909	3.63636	3.9	3.75	3.3
913	1	20	1	1	1	1	3	1	1	1	0	0	0	0	0	0	0	2	1	2	3.16667	2.5	2.6	1.55556	1.11111	2.90909	3.63636	3.9	3.75	3.3
914	1	20	1	1	1	1	3	1	1	1	0	0	0	0	0	0	0	2	1	2	3.16667	2.5	2.6	1.55556	1.11111	2.90909	3.63636	3.9	3.75	3.3
915	1	20	1	1	1	1	3	1	1	1	0	0	0	0	0	0	0	2	1	2	3.16667	2.5	2.6	1.55556	1.11111	2.90909	3.63636	3.9	3.75	3.3
918	1	20	1	1	1	1	3	1	1	1	0	0	0	0	0	0	0	2	1	2	3.16667	2.5	2.6	1.55556	1.11111	2.90909	3.63636	3.9	3.75	3.3
919	1	20	1	1	1	1	3	1	1	1	0	0	0	0	0	0	0	2	1	2	3.16667	2.5	2.6	1.55556	1.11111	2.90909	3.63636	3.9	3.75	3.3
920	1	20	1	1	1	1	3	1	1	1	0	0	0	0	0	0	0	2	1	2	3.16667	2.5	2.6	1.55556	1.11111	2.90909	3.63636	3.9	3.75	3.3
921	1	20	1	1	1	1	3	1	1	1	0	0	0	0	0	0	0	2	1	2	3.16667	2.5	2.6	1.55556	1.11111	2.90909	3.63636	3.9	3.75	3.3
924	1	20	1	1	1	1	3	1	1	1	0	0	0	0	0	0	0	2	1	2	3.16667	2.5	2.6	1.55556	1.11111	2.90909	3.63636	3.9	3.75	3.3
925	2	18	1	1	2	2	2	1	1	1	1	1	0	0	0	0	0	7	5	1	2.16667	2.5	2.1	2.44444	1.74603	3.27273	3.27273	3.4	3.66667	2.4
926	2	18	1	1	2	2	2	1	1	1	1	1	0	0	0	0	0	7	5	1	2.16667	2.5	2.1	2.44444	1.74603	3.27273	3.27273	3.4	3.66667	2.4
927	2	18	1	1	2	2	2	1	1	1	1	1	0	0	0	0	0	7	5	1	2.16667	2.5	2.1	2.44444	1.74603	3.27273	3.27273	3.4	3.66667	2.4
929	2	18	1	1	2	2	2	1	1	1	1	1	0	0	0	0	0	7	5	1	2.16667	2.5	2.1	2.44444	1.74603	3.27273	3.27273	3.4	3.66667	2.4
930	2	18	1	1	2	2	2	1	1	1	1	1	0	0	0	0	0	7	5	1	2.16667	2.5	2.1	2.44444	1.74603	3.27273	3.27273	3.4	3.66667	2.4
931	2	18	1	1	2	2	2	1	1	1	1	1	0	0	0	0	0	7	5	1	2.16667	2.5	2.1	2.44444	1.74603	3.27273	3.27273	3.4	3.66667	2.4
932	2	18	1	1	2	2	2	1	1	1	1	1	0	0	0	0	0	7	5	1	2.16667	2.5	2.1	2.44444	1.74603	3.27273	3.27273	3.4	3.66667	2.4
933	2	18	1	1	2	2	2	1	1	1	1	1	0	0	0	0	0	7	5	1	2.16667	2.5	2.1	2.44444	1.74603	3.27273	3.27273	3.4	3.66667	2.4
934	2	18	1	1	1	1	3	1	1	1	0	1	0	0	0	0	0	4	9	1	1.66667	3.75	2.4	2.77778	1.98413	3.18182	3.27273	4	2.75	3.8
935	2	18	1	1	1	1	3	1	1	1	0	1	0	0	0	0	0	4	9	1	1.66667	3.75	2.4	2.77778	1.98413	3.18182	3.27273	4	2.75	3.8
936	2	18	1	1	1	1	3	1	1	1	0	1	0	0	0	0	0	4	9	1	1.66667	3.75	2.4	2.77778	1.98413	3.18182	3.27273	4	2.75	3.8
939	2	18	1	1	1	1	3	1	1	1	0	1	0	0	0	0	0	4	9	1	1.66667	3.75	2.4	2.77778	1.98413	3.18182	3.27273	4	2.75	3.8
940	1	19	1	1	1	1	3	1	1	1	0	1	0	0	0	0	0	6	9	2	2.83333	2.75	3	4.11111	2.93651	2.18182	3.27273	5	3.66667	2.7
941	1	19	1	1	1	1	3	1	1	1	0	1	0	0	0	0	0	6	9	2	2.83333	2.75	3	4.11111	2.93651	2.18182	3.27273	5	3.66667	2.7
942	1	19	1	1	1	1	3	1	1	1	0	1	0	0	0	0	0	6	9	2	2.83333	2.75	3	4.11111	2.93651	2.18182	3.27273	5	3.66667	2.7
945	1	19	1	1	1	1	3	1	1	1	0	1	0	0	0	0	0	6	9	2	2.83333	2.75	3	4.11111	2.93651	2.18182	3.27273	5	3.66667	2.7
946	1	19	1	1	1	1	3	1	1	1	0	1	0	0	0	0	0	6	9	2	2.83333	2.75	3	4.11111	2.93651	2.18182	3.27273	5	3.66667	2.7
947	1	19	1	1	1	1	3	1	1	1	0	1	0	0	0	0	0	6	9	2	2.83333	2.75	3	4.11111	2.93651	2.18182	3.27273	5	3.66667	2.7
948	1	19	1	1	1	1	3	1	1	1	0	1	0	0	0	0	0	6	9	2	2.83333	2.75	3	4.11111	2.93651	2.18182	3.27273	5	3.66667	2.7
949	1	19	1	1	1	1	3	1	1	1	0	1	0	0	0	0	0	6	9	2	2.83333	2.75	3	4.11111	2.93651	2.18182	3.27273	5	3.66667	2.7
950	2	20	2	2	1	2	2	1	1	1	0	1	1	0	0	0	0	7	6	2	2.33333	3	4	4.88889	3.49206	3.54545	2.45455	4.9	3.08333	3.4
951	2	20	2	2	1	2	2	1	1	1	0	1	1	0	0	0	0	7	6	2	2.33333	3	4	4.88889	3.49206	3.54545	2.45455	4.9	3.08333	3.4
952	2	20	2	2	1	2	2	1	1	1	0	1	1	0	0	0	0	7	6	2	2.33333	3	4	4.88889	3.49206	3.54545	2.45455	4.9	3.08333	3.4
953	2	20	2	2	1	2	2	1	1	1	0	1	1	0	0	0	0	7	6	2	2.33333	3	4	4.88889	3.49206	3.54545	2.45455	4.9	3.08333	3.4
954	2	20	1	1	1	2	2	1	1	1	0	0	1	0	0	0	0	3	1	2	3	3	3.1	3.77778	2.69841	3.81818	4.63636	3.2	4.33333	2
955	2	20	1	1	1	2	2	1	1	1	0	0	1	0	0	0	0	3	1	2	3	3	3.1	3.77778	2.69841	3.81818	4.63636	3.2	4.33333	2
956	2	20	1	1	1	2	2	1	1	1	0	0	1	0	0	0	0	3	1	2	3	3	3.1	3.77778	2.69841	3.81818	4.63636	3.2	4.33333	2
957	2	20	1	1	1	2	2	1	1	1	0	0	1	0	0	0	0	3	1	2	3	3	3.1	3.77778	2.69841	3.81818	4.63636	3.2	4.33333	2
958	2	18	1	1	1	2	3	1	0	1	0	0	0	0	0	0	0	7	1	2	1.16667	2	2.9	5.55556	3.96825	3.90909	4	4	3.25	2.2
959	2	18	1	1	1	2	3	1	0	1	0	0	0	0	0	0	0	7	1	2	1.16667	2	2.9	5.55556	3.96825	3.90909	4	4	3.25	2.2
960	2	18	1	1	1	2	3	1	0	1	0	0	0	0	0	0	0	7	1	2	1.16667	2	2.9	5.55556	3.96825	3.90909	4	4	3.25	2.2
963	2	18	1	1	1	2	3	1	0	1	0	0	0	0	0	0	0	7	1	2	1.16667	2	2.9	5.55556	3.96825	3.90909	4	4	3.25	2.2
964	2	18	1	1	1	2	3	1	0	1	0	0	0	0	0	0	0	7	1	2	1.16667	2	2.9	5.55556	3.96825	3.90909	4	4	3.25	2.2
965	2	18	1	1	1	2	3	1	0	1	0	0	0	0	0	0	0	7	1	2	1.16667	2	2.9	5.55556	3.96825	3.90909	4	4	3.25	2.2
966	2	18	1	1	1	2	3	1	0	1	0	0	0	0	0	0	0	7	1	2	1.16667	2	2.9	5.55556	3.96825	3.90909	4	4	3.25	2.2
967	2	18	1	1	1	2	3	1	0	1	0	0	0	0	0	0	0	7	1	2	1.16667	2	2.9	5.55556	3.96825	3.90909	4	4	3.25	2.2
968	1	18	1	1	2	2	3	1	1	1	0	0	0	0	0	0	0	7	6	2	3	4.5	4.6	6.33333	4.52381	4	3.90909	5	4.75	3
969	1	18	1	1	2	2	3	1	1	1	0	0	0	0	0	0	0	7	6	2	3	4.5	4.6	6.33333	4.52381	4	3.90909	5	4.75	3
970	1	18	1	1	2	2	3	1	1	1	0	0	0	0	0	0	0	7	6	2	3	4.5	4.6	6.33333	4.52381	4	3.90909	5	4.75	3
971	1	18	1	1	2	2	3	1	1	1	0	0	0	0	0	0	0	7	6	2	3	4.5	4.6	6.33333	4.52381	4	3.90909	5	4.75	3
972	1	19	1	1	2	2	2	1	1	1	0	1	0	0	0	1	0	7	2	1	3.16667	1.75	2.2	2.66667	1.90476	1.90909	3.18182	1.8	3	2.8
973	1	19	1	1	2	2	2	1	1	1	0	1	0	0	0	1	0	7	2	1	3.16667	1.75	2.2	2.66667	1.90476	1.90909	3.18182	1.8	3	2.8
974	1	19	1	1	2	2	2	1	1	1	0	1	0	0	0	1	0	7	2	1	3.16667	1.75	2.2	2.66667	1.90476	1.90909	3.18182	1.8	3	2.8
975	1	19	1	1	2	2	2	1	1	1	0	1	0	0	0	1	0	7	2	1	3.16667	1.75	2.2	2.66667	1.90476	1.90909	3.18182	1.8	3	2.8
976	2	19	1	1	1	1	2	1	1	1	0	0	0	0	0	0	0	4	1	2	4.5	3.25	3	4.11111	2.93651	3.09091	2.54545	3.7	3.75	2.6
977	2	19	1	1	1	1	2	1	1	1	0	0	0	0	0	0	0	4	1	2	4.5	3.25	3	4.11111	2.93651	3.09091	2.54545	3.7	3.75	2.6
978	2	19	1	1	1	1	2	1	1	1	0	0	0	0	0	0	0	4	1	2	4.5	3.25	3	4.11111	2.93651	3.09091	2.54545	3.7	3.75	2.6
979	2	19	1	1	1	1	2	1	1	1	0	0	0	0	0	0	0	4	1	2	4.5	3.25	3	4.11111	2.93651	3.09091	2.54545	3.7	3.75	2.6
980	1	19	1	1	2	2	2	1	1	1	0	1	0	0	0	1	0	7	2	1	3.16667	1.75	2.2	2.66667	1.90476	1.90909	3.18182	1.8	3	2.8
981	1	19	1	1	2	2	2	1	1	1	0	1	0	0	0	1	0	7	2	1	3.16667	1.75	2.2	2.66667	1.90476	1.90909	3.18182	1.8	3	2.8
982	1	19	1	1	2	2	2	1	1	1	0	1	0	0	0	1	0	7	2	1	3.16667	1.75	2.2	2.66667	1.90476	1.90909	3.18182	1.8	3	2.8
983	1	19	1	1	2	2	2	1	1	1	0	1	0	0	0	1	0	7	2	1	3.16667	1.75	2.2	2.66667	1.90476	1.90909	3.18182	1.8	3	2.8
984	2	20	2	2	1	2	3	1	1	1	0	0	0	0	0	0	0	7	4	1	5	5	5	4.33333	3.09524	4.63636	4.63636	4.6	4.5	2.5
985	2	20	2	2	1	2	3	1	1	1	0	0	0	0	0	0	0	7	4	1	5	5	5	4.33333	3.09524	4.63636	4.63636	4.6	4.5	2.5
986	2	20	2	2	1	2	3	1	1	1	0	0	0	0	0	0	0	7	4	1	5	5	5	4.33333	3.09524	4.63636	4.63636	4.6	4.5	2.5
987	2	20	2	2	1	2	3	1	1	1	0	0	0	0	0	0	0	7	4	1	5	5	5	4.33333	3.09524	4.63636	4.63636	4.6	4.5	2.5
988	2	19	2	1	2	1	2	1	1	1	0	0	0	0	0	0	1	3	5	2	2	3.25	3.3	3.11111	2.22222	2.54545	3.45455	4	4.16667	3.5
989	2	19	2	1	2	1	2	1	1	1	0	0	0	0	0	0	1	3	5	2	2	3.25	3.3	3.11111	2.22222	2.54545	3.45455	4	4.16667	3.5
990	2	19	2	1	2	1	2	1	1	1	0	0	0	0	0	0	1	3	5	2	2	3.25	3.3	3.11111	2.22222	2.54545	3.45455	4	4.16667	3.5
991	2	19	2	1	2	1	2	1	1	1	0	0	0	0	0	0	1	3	5	2	2	3.25	3.3	3.11111	2.22222	2.54545	3.45455	4	4.16667	3.5
992	2	19	2	1	2	1	2	1	1	1	0	0	0	0	0	0	1	3	5	2	2	3.25	3.3	3.11111	2.22222	2.54545	3.45455	4	4.16667	3.5
993	2	19	2	1	2	1	2	1	1	1	0	0	0	0	0	0	1	3	5	2	2	3.25	3.3	3.11111	2.22222	2.54545	3.45455	4	4.16667	3.5
994	2	19	2	1	2	1	2	1	1	1	0	0	0	0	0	0	1	3	5	2	2	3.25	3.3	3.11111	2.22222	2.54545	3.45455	4	4.16667	3.5
995	2	19	2	1	2	1	2	1	1	1	0	0	0	0	0	0	1	3	5	2	2	3.25	3.3	3.11111	2.22222	2.54545	3.45455	4	4.16667	3.5
996	1	19	1	1	1	1	3	1	1	1	1	0	0	0	0	0	0	7	9	1	5	4	3.3	2.11111	1.50794	2.81818	3.09091	3.1	4.08333	3.3
997	1	19	1	1	1	1	3	1	1	1	1	0	0	0	0	0	0	7	9	1	5	4	3.3	2.11111	1.50794	2.81818	3.09091	3.1	4.08333	3.3
998	1	19	1	1	1	1	3	1	1	1	1	0	0	0	0	0	0	7	9	1	5	4	3.3	2.11111	1.50794	2.81818	3.09091	3.1	4.08333	3.3
999	1	19	1	1	1	1	3	1	1	1	1	0	0	0	0	0	0	7	9	1	5	4	3.3	2.11111	1.50794	2.81818	3.09091	3.1	4.08333	3.3
1000	1	19	1	1	1	1	3	1	1	1	1	0	0	0	0	0	0	7	9	1	5	4	3.3	2.11111	1.50794	2.81818	3.09091	3.1	4.08333	3.3
1001	1	19	1	1	1	1	3	1	1	1	1	0	0	0	0	0	0	7	9	1	5	4	3.3	2.11111	1.50794	2.81818	3.09091	3.1	4.08333	3.3
1002	1	19	1	1	1	1	3	1	1	1	1	0	0	0	0	0	0	7	9	1	5	4	3.3	2.11111	1.50794	2.81818	3.09091	3.1	4.08333	3.3
1003	1	19	1	1	1	1	3	1	1	1	1	0	0	0	0	0	0	7	9	1	5	4	3.3	2.11111	1.50794	2.81818	3.09091	3.1	4.08333	3.3
1004	2	19	1	1	2	2	3	1	1	1	1	0	0	0	0	0	0	4	4	2	2.33333	2.75	2.2	4	2.85714	2.72727	3.36364	5	3.16667	2.5
1005	2	19	1	1	2	2	3	1	1	1	1	0	0	0	0	0	0	4	4	2	2.33333	2.75	2.2	4	2.85714	2.72727	3.36364	5	3.16667	2.5
1006	2	19	1	1	2	2	3	1	1	1	1	0	0	0	0	0	0	4	4	2	2.33333	2.75	2.2	4	2.85714	2.72727	3.36364	5	3.16667	2.5
1007	2	19	1	1	2	2	3	1	1	1	1	0	0	0	0	0	0	4	4	2	2.33333	2.75	2.2	4	2.85714	2.72727	3.36364	5	3.16667	2.5
1008	1	19	1	1	1	2	3	1	1	1	0	1	0	0	0	0	0	7	2	1	3	3.25	2.4	3.88889	2.77778	3.27273	2.81818	3.3	3.5	3.2
1009	1	19	1	1	1	2	3	1	1	1	0	1	0	0	0	0	0	7	2	1	3	3.25	2.4	3.88889	2.77778	3.27273	2.81818	3.3	3.5	3.2
1010	1	19	1	1	1	2	3	1	1	1	0	1	0	0	0	0	0	7	2	1	3	3.25	2.4	3.88889	2.77778	3.27273	2.81818	3.3	3.5	3.2
1011	1	19	1	1	1	2	3	1	1	1	0	1	0	0	0	0	0	7	2	1	3	3.25	2.4	3.88889	2.77778	3.27273	2.81818	3.3	3.5	3.2
1012	1	19	1	1	1	2	3	1	1	1	0	1	0	0	0	0	0	7	2	1	3	3.25	2.4	3.88889	2.77778	3.27273	2.81818	3.3	3.5	3.2
1013	1	19	1	1	1	2	3	1	1	1	0	1	0	0	0	0	0	7	2	1	3	3.25	2.4	3.88889	2.77778	3.27273	2.81818	3.3	3.5	3.2
1014	1	19	1	1	1	2	3	1	1	1	0	1	0	0	0	0	0	7	2	1	3	3.25	2.4	3.88889	2.77778	3.27273	2.81818	3.3	3.5	3.2
1016	1	19	1	1	1	2	3	1	1	1	0	1	0	0	0	0	0	7	2	1	3	3.25	2.4	3.88889	2.77778	3.27273	2.81818	3.3	3.5	3.2
1017	1	21	2	2	1	1	2	1	1	1	0	0	0	0	0	0	0	3	1	2	2.33333	2.25	2.4	2.66667	1.90476	3.36364	2.72727	3.9	3.25	2.9
1018	1	21	2	2	1	1	2	1	1	1	0	0	0	0	0	0	0	3	1	2	2.33333	2.25	2.4	2.66667	1.90476	3.36364	2.72727	3.9	3.25	2.9
1019	1	21	2	2	1	1	2	1	1	1	0	0	0	0	0	0	0	3	1	2	2.33333	2.25	2.4	2.66667	1.90476	3.36364	2.72727	3.9	3.25	2.9
1020	1	21	2	2	1	1	2	1	1	1	0	0	0	0	0	0	0	3	1	2	2.33333	2.25	2.4	2.66667	1.90476	3.36364	2.72727	3.9	3.25	2.9
1021	2	20	2	2	2	2	3	1	1	1	0	1	0	0	0	0	0	4	5	1	1	3.75	2.5	3.88889	2.77778	2	2.90909	4	4.08333	3.2
1022	2	20	2	2	2	2	3	1	1	1	0	1	0	0	0	0	0	4	5	1	1	3.75	2.5	3.88889	2.77778	2	2.90909	4	4.08333	3.2
1023	2	20	2	2	2	2	3	1	1	1	0	1	0	0	0	0	0	4	5	1	1	3.75	2.5	3.88889	2.77778	2	2.90909	4	4.08333	3.2
1029	2	20	2	2	2	2	3	1	1	1	0	1	0	0	0	0	0	4	5	1	1	3.75	2.5	3.88889	2.77778	2	2.90909	4	4.08333	3.2
1030	2	20	2	2	2	2	3	1	1	1	0	1	0	0	0	0	0	4	5	1	1	3.75	2.5	3.88889	2.77778	2	2.90909	4	4.08333	3.2
1031	2	20	2	2	2	2	3	1	1	1	0	1	0	0	0	0	0	4	5	1	1	3.75	2.5	3.88889	2.77778	2	2.90909	4	4.08333	3.2
1032	2	20	2	2	2	2	3	1	1	1	0	1	0	0	0	0	0	4	5	1	1	3.75	2.5	3.88889	2.77778	2	2.90909	4	4.08333	3.2
1033	2	20	2	2	2	2	3	1	1	1	0	1	0	0	0	0	0	4	5	1	1	3.75	2.5	3.88889	2.77778	2	2.90909	4	4.08333	3.2
1034	1	20	1	1	2	2	2	1	0	1	0	0	0	0	0	0	0	6	5	2	4.16667	1.5	2	2.33333	1.66667	3.36364	3	3	2.83333	3.3
1035	1	20	1	1	2	2	2	1	0	1	0	0	0	0	0	0	0	6	5	2	4.16667	1.5	2	2.33333	1.66667	3.36364	3	3	2.83333	3.3
1036	1	20	1	1	2	2	2	1	0	1	0	0	0	0	0	0	0	6	5	2	4.16667	1.5	2	2.33333	1.66667	3.36364	3	3	2.83333	3.3
1037	1	20	1	1	2	2	2	1	0	1	0	0	0	0	0	0	0	6	5	2	4.16667	1.5	2	2.33333	1.66667	3.36364	3	3	2.83333	3.3
1038	2	18	1	1	1	2	2	1	1	1	0	1	0	0	0	0	0	7	1	2	1	5	3.3	4	2.85714	3	3	3.6	3.5	3.1
1039	2	18	1	1	1	2	2	1	1	1	0	1	0	0	0	0	0	7	1	2	1	5	3.3	4	2.85714	3	3	3.6	3.5	3.1
1040	2	18	1	1	1	2	2	1	1	1	0	1	0	0	0	0	0	7	1	2	1	5	3.3	4	2.85714	3	3	3.6	3.5	3.1
1041	2	18	1	1	1	2	2	1	1	1	0	1	0	0	0	0	0	7	1	2	1	5	3.3	4	2.85714	3	3	3.6	3.5	3.1
1042	1	19	1	1	2	2	2	1	1	0	0	0	0	0	0	0	0	2	1	2	2	2	2	2.33333	1.66667	1.90909	3	2.8	3.25	3.2
1043	1	19	1	1	2	2	2	1	1	0	0	0	0	0	0	0	0	2	1	2	2	2	2	2.33333	1.66667	1.90909	3	2.8	3.25	3.2
1044	1	19	1	1	2	2	2	1	1	0	0	0	0	0	0	0	0	2	1	2	2	2	2	2.33333	1.66667	1.90909	3	2.8	3.25	3.2
1047	1	19	1	1	2	2	2	1	1	0	0	0	0	0	0	0	0	2	1	2	2	2	2	2.33333	1.66667	1.90909	3	2.8	3.25	3.2
1048	2	19	1	1	1	2	3	1	1	1	0	1	0	0	0	0	0	4	2	2	2.66667	3	2.8	2	1.42857	2.90909	3.63636	3.6	3.33333	3.6
1049	2	19	1	1	1	2	3	1	1	1	0	1	0	0	0	0	0	4	2	2	2.66667	3	2.8	2	1.42857	2.90909	3.63636	3.6	3.33333	3.6
1050	2	19	1	1	1	2	3	1	1	1	0	1	0	0	0	0	0	4	2	2	2.66667	3	2.8	2	1.42857	2.90909	3.63636	3.6	3.33333	3.6
1052	2	19	1	1	1	2	3	1	1	1	0	1	0	0	0	0	0	4	2	2	2.66667	3	2.8	2	1.42857	2.90909	3.63636	3.6	3.33333	3.6
1053	1	21	1	1	2	2	2	1	1	1	0	1	0	1	0	1	0	4	1	2	2	1.25	1	1	0.714286	1	1	1.2	1.66667	4.4
1054	1	21	1	1	2	2	2	1	1	1	0	1	0	1	0	1	0	4	1	2	2	1.25	1	1	0.714286	1	1	1.2	1.66667	4.4
1055	1	21	1	1	2	2	2	1	1	1	0	1	0	1	0	1	0	4	1	2	2	1.25	1	1	0.714286	1	1	1.2	1.66667	4.4
1056	1	21	1	1	2	2	2	1	1	1	0	1	0	1	0	1	0	4	1	2	2	1.25	1	1	0.714286	1	1	1.2	1.66667	4.4
1057	1	21	1	1	2	2	2	1	1	1	0	1	0	1	0	1	0	4	1	2	2	1.25	1	1	0.714286	1	1	1.2	1.66667	4.4
1058	1	21	1	1	2	2	2	1	1	1	0	1	0	1	0	1	0	4	1	2	2	1.25	1	1	0.714286	1	1	1.2	1.66667	4.4
1059	1	21	1	1	2	2	2	1	1	1	0	1	0	1	0	1	0	4	1	2	2	1.25	1	1	0.714286	1	1	1.2	1.66667	4.4
1062	1	21	1	1	2	2	2	1	1	1	0	1	0	1	0	1	0	4	1	2	2	1.25	1	1	0.714286	1	1	1.2	1.66667	4.4
1063	2	20	2	2	1	2	3	1	1	0	0	0	0	0	0	0	0	2	1	2	1	3	2.8	2.55556	1.8254	2.63636	2.54545	4.2	2.5	3.7
1064	2	20	2	2	1	2	3	1	1	0	0	0	0	0	0	0	0	2	1	2	1	3	2.8	2.55556	1.8254	2.63636	2.54545	4.2	2.5	3.7
1065	2	20	2	2	1	2	3	1	1	0	0	0	0	0	0	0	0	2	1	2	1	3	2.8	2.55556	1.8254	2.63636	2.54545	4.2	2.5	3.7
1067	2	20	2	2	1	2	3	1	1	0	0	0	0	0	0	0	0	2	1	2	1	3	2.8	2.55556	1.8254	2.63636	2.54545	4.2	2.5	3.7
1068	2	20	2	2	1	2	3	1	1	0	0	0	0	0	0	0	0	2	1	2	1	3	2.8	2.55556	1.8254	2.63636	2.54545	4.2	2.5	3.7
1069	2	20	2	2	1	2	3	1	1	0	0	0	0	0	0	0	0	2	1	2	1	3	2.8	2.55556	1.8254	2.63636	2.54545	4.2	2.5	3.7
1070	2	20	2	2	1	2	3	1	1	0	0	0	0	0	0	0	0	2	1	2	1	3	2.8	2.55556	1.8254	2.63636	2.54545	4.2	2.5	3.7
1071	2	20	2	2	1	2	3	1	1	0	0	0	0	0	0	0	0	2	1	2	1	3	2.8	2.55556	1.8254	2.63636	2.54545	4.2	2.5	3.7
1072	1	19	1	1	2	2	3	1	1	1	0	0	0	0	0	1	0	2	1	2	4	3.5	1.8	1.77778	1.26984	3	3	3.1	3.66667	3.3
1073	1	19	1	1	2	2	3	1	1	1	0	0	0	0	0	1	0	2	1	2	4	3.5	1.8	1.77778	1.26984	3	3	3.1	3.66667	3.3
1074	1	19	1	1	2	2	3	1	1	1	0	0	0	0	0	1	0	2	1	2	4	3.5	1.8	1.77778	1.26984	3	3	3.1	3.66667	3.3
1076	1	19	1	1	2	2	3	1	1	1	0	0	0	0	0	1	0	2	1	2	4	3.5	1.8	1.77778	1.26984	3	3	3.1	3.66667	3.3
1077	1	19	1	1	2	2	3	1	1	1	0	0	0	0	0	1	0	2	1	2	4	3.5	1.8	1.77778	1.26984	3	3	3.1	3.66667	3.3
1078	1	19	1	1	2	2	3	1	1	1	0	0	0	0	0	1	0	2	1	2	4	3.5	1.8	1.77778	1.26984	3	3	3.1	3.66667	3.3
1079	1	19	1	1	2	2	3	1	1	1	0	0	0	0	0	1	0	2	1	2	4	3.5	1.8	1.77778	1.26984	3	3	3.1	3.66667	3.3
1080	1	19	1	1	2	2	3	1	1	1	0	0	0	0	0	1	0	2	1	2	4	3.5	1.8	1.77778	1.26984	3	3	3.1	3.66667	3.3
1081	2	21	2	2	1	2	3	1	1	1	0	0	0	0	0	0	0	5	6	1	2.33333	3.75	2.8	4.11111	2.93651	3.18182	3.63636	4	3.25	3.2
1082	2	21	2	2	1	2	3	1	1	1	0	0	0	0	0	0	0	5	6	1	2.33333	3.75	2.8	4.11111	2.93651	3.18182	3.63636	4	3.25	3.2
1083	2	21	2	2	1	2	3	1	1	1	0	0	0	0	0	0	0	5	6	1	2.33333	3.75	2.8	4.11111	2.93651	3.18182	3.63636	4	3.25	3.2
1084	2	21	2	2	1	2	3	1	1	1	0	0	0	0	0	0	0	5	6	1	2.33333	3.75	2.8	4.11111	2.93651	3.18182	3.63636	4	3.25	3.2
1085	1	20	2	2	2	1	2	1	1	1	0	0	0	0	0	0	0	5	5	1	2.16667	2.5	2.4	3.77778	2.69841	3.27273	2.72727	3	3.08333	2.8
1086	1	20	2	2	2	1	2	1	1	1	0	0	0	0	0	0	0	5	5	1	2.16667	2.5	2.4	3.77778	2.69841	3.27273	2.72727	3	3.08333	2.8
1087	1	20	2	2	2	1	2	1	1	1	0	0	0	0	0	0	0	5	5	1	2.16667	2.5	2.4	3.77778	2.69841	3.27273	2.72727	3	3.08333	2.8
1088	1	20	2	2	2	1	2	1	1	1	0	0	0	0	0	0	0	5	5	1	2.16667	2.5	2.4	3.77778	2.69841	3.27273	2.72727	3	3.08333	2.8
1089	2	18	1	1	2	2	2	1	0	1	1	0	0	0	0	0	1	2	2	2	6	4	2.1	1	0.714286	2.09091	2.90909	4.9	3.16667	3.6
1090	2	18	1	1	2	2	2	1	0	1	1	0	0	0	0	0	1	2	2	2	6	4	2.1	1	0.714286	2.09091	2.90909	4.9	3.16667	3.6
1091	2	18	1	1	2	2	2	1	0	1	1	0	0	0	0	0	1	2	2	2	6	4	2.1	1	0.714286	2.09091	2.90909	4.9	3.16667	3.6
1092	2	18	1	1	2	2	2	1	0	1	1	0	0	0	0	0	1	2	2	2	6	4	2.1	1	0.714286	2.09091	2.90909	4.9	3.16667	3.6
1093	2	18	1	1	2	2	2	1	0	1	1	0	0	0	0	0	1	2	2	2	6	4	2.1	1	0.714286	2.09091	2.90909	4.9	3.16667	3.6
1094	2	18	1	1	2	2	2	1	0	1	1	0	0	0	0	0	1	2	2	2	6	4	2.1	1	0.714286	2.09091	2.90909	4.9	3.16667	3.6
1095	2	18	1	1	2	2	2	1	0	1	1	0	0	0	0	0	1	2	2	2	6	4	2.1	1	0.714286	2.09091	2.90909	4.9	3.16667	3.6
1097	2	18	1	1	2	2	2	1	0	1	1	0	0	0	0	0	1	2	2	2	6	4	2.1	1	0.714286	2.09091	2.90909	4.9	3.16667	3.6
1098	1	19	2	1	2	2	4	0	1	0	0	0	0	0	0	0	0	7	4	2	2.33333	1.75	1.8	4	2.85714	2.09091	2.90909	3.5	2.58333	2.8
1099	1	19	2	1	2	2	4	0	1	0	0	0	0	0	0	0	0	7	4	2	2.33333	1.75	1.8	4	2.85714	2.09091	2.90909	3.5	2.58333	2.8
1100	1	19	2	1	2	2	4	0	1	0	0	0	0	0	0	0	0	7	4	2	2.33333	1.75	1.8	4	2.85714	2.09091	2.90909	3.5	2.58333	2.8
1101	1	19	2	1	2	2	4	0	1	0	0	0	0	0	0	0	0	7	4	2	2.33333	1.75	1.8	4	2.85714	2.09091	2.90909	3.5	2.58333	2.8
1102	1	18	1	1	1	2	2	1	1	0	0	1	0	0	0	1	0	4	6	1	2	3	1.3	1	0.714286	2.27273	2.09091	3.8	2.66667	4.1
1103	1	18	1	1	1	2	2	1	1	0	0	1	0	0	0	1	0	4	6	1	2	3	1.3	1	0.714286	2.27273	2.09091	3.8	2.66667	4.1
1104	1	18	1	1	1	2	2	1	1	0	0	1	0	0	0	1	0	4	6	1	2	3	1.3	1	0.714286	2.27273	2.09091	3.8	2.66667	4.1
1106	1	18	1	1	1	2	2	1	1	0	0	1	0	0	0	1	0	4	6	1	2	3	1.3	1	0.714286	2.27273	2.09091	3.8	2.66667	4.1
1107	1	18	1	1	1	2	2	1	1	0	0	1	0	0	0	1	0	4	6	1	2	3	1.3	1	0.714286	2.27273	2.09091	3.8	2.66667	4.1
1108	1	18	1	1	1	2	2	1	1	0	0	1	0	0	0	1	0	4	6	1	2	3	1.3	1	0.714286	2.27273	2.09091	3.8	2.66667	4.1
1109	1	18	1	1	1	2	2	1	1	0	0	1	0	0	0	1	0	4	6	1	2	3	1.3	1	0.714286	2.27273	2.09091	3.8	2.66667	4.1
1110	1	18	1	1	1	2	2	1	1	0	0	1	0	0	0	1	0	4	6	1	2	3	1.3	1	0.714286	2.27273	2.09091	3.8	2.66667	4.1
1111	2	18	2	1	2	2	2	1	1	0	0	0	0	0	0	0	0	4	3	1	4.33333	2.25	2.8	4.88889	3.49206	3.63636	3.81818	4	3.58333	2.4
1112	2	18	2	1	2	2	2	1	1	0	0	0	0	0	0	0	0	4	3	1	4.33333	2.25	2.8	4.88889	3.49206	3.63636	3.81818	4	3.58333	2.4
1113	2	18	2	1	2	2	2	1	1	0	0	0	0	0	0	0	0	4	3	1	4.33333	2.25	2.8	4.88889	3.49206	3.63636	3.81818	4	3.58333	2.4
1124	2	18	2	1	2	2	2	1	1	0	0	0	0	0	0	0	0	4	3	1	4.33333	2.25	2.8	4.88889	3.49206	3.63636	3.81818	4	3.58333	2.4
1125	2	18	2	1	2	2	2	1	1	0	0	0	0	0	0	0	0	4	3	1	4.33333	2.25	2.8	4.88889	3.49206	3.63636	3.81818	4	3.58333	2.4
1126	2	18	2	1	2	2	2	1	1	0	0	0	0	0	0	0	0	4	3	1	4.33333	2.25	2.8	4.88889	3.49206	3.63636	3.81818	4	3.58333	2.4
1127	2	18	2	1	2	2	2	1	1	0	0	0	0	0	0	0	0	4	3	1	4.33333	2.25	2.8	4.88889	3.49206	3.63636	3.81818	4	3.58333	2.4
1128	2	18	2	1	2	2	2	1	1	0	0	0	0	0	0	0	0	4	3	1	4.33333	2.25	2.8	4.88889	3.49206	3.63636	3.81818	4	3.58333	2.4
1129	2	19	1	1	2	2	4	1	1	1	0	1	0	0	0	1	0	4	6	1	3	3.75	2.6	3.66667	2.61905	3.09091	2.54545	4.9	3.58333	3.3
1130	2	19	1	1	2	2	4	1	1	1	0	1	0	0	0	1	0	4	6	1	3	3.75	2.6	3.66667	2.61905	3.09091	2.54545	4.9	3.58333	3.3
1131	2	19	1	1	2	2	4	1	1	1	0	1	0	0	0	1	0	4	6	1	3	3.75	2.6	3.66667	2.61905	3.09091	2.54545	4.9	3.58333	3.3
1134	2	19	1	1	2	2	4	1	1	1	0	1	0	0	0	1	0	4	6	1	3	3.75	2.6	3.66667	2.61905	3.09091	2.54545	4.9	3.58333	3.3
1135	2	19	1	1	1	2	3	1	1	1	1	0	0	0	0	0	0	3	1	2	2.33333	2.5	1.7	2	1.42857	2.36364	2.90909	3.8	2.33333	3.4
1136	2	19	1	1	1	2	3	1	1	1	1	0	0	0	0	0	0	3	1	2	2.33333	2.5	1.7	2	1.42857	2.36364	2.90909	3.8	2.33333	3.4
1137	2	19	1	1	1	2	3	1	1	1	1	0	0	0	0	0	0	3	1	2	2.33333	2.5	1.7	2	1.42857	2.36364	2.90909	3.8	2.33333	3.4
1140	2	19	1	1	1	2	3	1	1	1	1	0	0	0	0	0	0	3	1	2	2.33333	2.5	1.7	2	1.42857	2.36364	2.90909	3.8	2.33333	3.4
1141	1	19	1	1	1	2	4	1	1	1	0	0	0	0	0	0	0	4	7	1	1	2.5	1.8	1.33333	0.952381	2.09091	1.72727	4.8	2.08333	4.4
1142	1	19	1	1	1	2	4	1	1	1	0	0	0	0	0	0	0	4	7	1	1	2.5	1.8	1.33333	0.952381	2.09091	1.72727	4.8	2.08333	4.4
1143	1	19	1	1	1	2	4	1	1	1	0	0	0	0	0	0	0	4	7	1	1	2.5	1.8	1.33333	0.952381	2.09091	1.72727	4.8	2.08333	4.4
1147	1	19	1	1	1	2	4	1	1	1	0	0	0	0	0	0	0	4	7	1	1	2.5	1.8	1.33333	0.952381	2.09091	1.72727	4.8	2.08333	4.4
1148	1	19	1	1	1	2	4	1	1	1	0	0	0	0	0	0	0	4	7	1	1	2.5	1.8	1.33333	0.952381	2.09091	1.72727	4.8	2.08333	4.4
1149	1	19	1	1	1	2	4	1	1	1	0	0	0	0	0	0	0	4	7	1	1	2.5	1.8	1.33333	0.952381	2.09091	1.72727	4.8	2.08333	4.4
1150	1	19	1	1	1	2	4	1	1	1	0	0	0	0	0	0	0	4	7	1	1	2.5	1.8	1.33333	0.952381	2.09091	1.72727	4.8	2.08333	4.4
1151	1	19	1	1	1	2	4	1	1	1	0	0	0	0	0	0	0	4	7	1	1	2.5	1.8	1.33333	0.952381	2.09091	1.72727	4.8	2.08333	4.4
1152	2	20	1	1	2	2	2	1	1	0	1	0	0	0	0	0	0	2	1	2	4	2.25	2.4	2.88889	2.06349	3.27273	3.18182	4.9	3.83333	4.7
1153	2	20	1	1	2	2	2	1	1	0	1	0	0	0	0	0	0	2	1	2	4	2.25	2.4	2.88889	2.06349	3.27273	3.18182	4.9	3.83333	4.7
1154	2	20	1	1	2	2	2	1	1	0	1	0	0	0	0	0	0	2	1	2	4	2.25	2.4	2.88889	2.06349	3.27273	3.18182	4.9	3.83333	4.7
1155	2	20	1	1	2	2	2	1	1	0	1	0	0	0	0	0	0	2	1	2	4	2.25	2.4	2.88889	2.06349	3.27273	3.18182	4.9	3.83333	4.7
1156	2	20	1	1	2	2	2	1	1	0	1	0	0	0	0	0	0	2	1	2	4	2.25	2.4	2.88889	2.06349	3.27273	3.18182	4.9	3.83333	4.7
1157	2	20	1	1	2	2	2	1	1	0	1	0	0	0	0	0	0	2	1	2	4	2.25	2.4	2.88889	2.06349	3.27273	3.18182	4.9	3.83333	4.7
1158	2	20	1	1	2	2	2	1	1	0	1	0	0	0	0	0	0	2	1	2	4	2.25	2.4	2.88889	2.06349	3.27273	3.18182	4.9	3.83333	4.7
1160	2	20	1	1	2	2	2	1	1	0	1	0	0	0	0	0	0	2	1	2	4	2.25	2.4	2.88889	2.06349	3.27273	3.18182	4.9	3.83333	4.7
1161	1	19	1	1	1	2	4	1	1	1	1	0	0	0	0	0	0	7	1	2	1.66667	2.25	2.1	2	1.42857	2.09091	2.36364	2.9	2.08333	3.6
1162	1	19	1	1	1	2	4	1	1	1	1	0	0	0	0	0	0	7	1	2	1.66667	2.25	2.1	2	1.42857	2.09091	2.36364	2.9	2.08333	3.6
1163	1	19	1	1	1	2	4	1	1	1	1	0	0	0	0	0	0	7	1	2	1.66667	2.25	2.1	2	1.42857	2.09091	2.36364	2.9	2.08333	3.6
1164	1	19	1	1	1	2	4	1	1	1	1	0	0	0	0	0	0	7	1	2	1.66667	2.25	2.1	2	1.42857	2.09091	2.36364	2.9	2.08333	3.6
1165	1	19	1	1	1	1	3	1	1	1	0	0	0	0	0	0	0	7	2	1	1	2	2.1	4.11111	2.93651	3.18182	2.45455	5	4	2.9
1166	1	19	1	1	1	1	3	1	1	1	0	0	0	0	0	0	0	7	2	1	1	2	2.1	4.11111	2.93651	3.18182	2.45455	5	4	2.9
1167	1	19	1	1	1	1	3	1	1	1	0	0	0	0	0	0	0	7	2	1	1	2	2.1	4.11111	2.93651	3.18182	2.45455	5	4	2.9
1170	1	19	1	1	1	1	3	1	1	1	0	0	0	0	0	0	0	7	2	1	1	2	2.1	4.11111	2.93651	3.18182	2.45455	5	4	2.9
1171	2	20	1	1	2	2	2	1	1	1	0	1	0	0	0	0	0	5	8	2	1	5	3.9	5	3.57143	3.45455	3.54545	5	3.66667	4.3
1172	2	20	1	1	2	2	2	1	1	1	0	1	0	0	0	0	0	5	8	2	1	5	3.9	5	3.57143	3.45455	3.54545	5	3.66667	4.3
1173	2	20	1	1	2	2	2	1	1	1	0	1	0	0	0	0	0	5	8	2	1	5	3.9	5	3.57143	3.45455	3.54545	5	3.66667	4.3
1176	2	20	1	1	2	2	2	1	1	1	0	1	0	0	0	0	0	5	8	2	1	5	3.9	5	3.57143	3.45455	3.54545	5	3.66667	4.3
1177	2	21	2	2	1	2	2	1	1	1	0	1	1	0	0	0	0	6	3	1	2	3	3	4	2.85714	3	3	4.4	3.33333	3
1178	2	21	2	2	1	2	2	1	1	1	0	1	1	0	0	0	0	6	3	1	2	3	3	4	2.85714	3	3	4.4	3.33333	3
1179	2	21	2	2	1	2	2	1	1	1	0	1	1	0	0	0	0	6	3	1	2	3	3	4	2.85714	3	3	4.4	3.33333	3
1182	2	21	2	2	1	2	2	1	1	1	0	1	1	0	0	0	0	6	3	1	2	3	3	4	2.85714	3	3	4.4	3.33333	3
1183	2	20	1	1	1	2	4	1	1	1	0	0	0	0	0	0	0	5	3	2	3.16667	2	1.6	2.55556	1.8254	1.45455	1.72727	4	2.91667	3.9
1184	2	20	1	1	1	2	4	1	1	1	0	0	0	0	0	0	0	5	3	2	3.16667	2	1.6	2.55556	1.8254	1.45455	1.72727	4	2.91667	3.9
1185	2	20	1	1	1	2	4	1	1	1	0	0	0	0	0	0	0	5	3	2	3.16667	2	1.6	2.55556	1.8254	1.45455	1.72727	4	2.91667	3.9
1187	2	20	1	1	1	2	4	1	1	1	0	0	0	0	0	0	0	5	3	2	3.16667	2	1.6	2.55556	1.8254	1.45455	1.72727	4	2.91667	3.9
1188	2	18	1	1	2	2	2	1	1	0	0	0	0	0	0	0	0	2	2	2	4	3	2.2	4	2.85714	3.18182	3.27273	3	3	3
1189	2	18	1	1	2	2	2	1	1	0	0	0	0	0	0	0	0	2	2	2	4	3	2.2	4	2.85714	3.18182	3.27273	3	3	3
1190	2	18	1	1	2	2	2	1	1	0	0	0	0	0	0	0	0	2	2	2	4	3	2.2	4	2.85714	3.18182	3.27273	3	3	3
1191	2	18	1	1	2	2	2	1	1	0	0	0	0	0	0	0	0	2	2	2	4	3	2.2	4	2.85714	3.18182	3.27273	3	3	3
1192	2	20	2	2	2	2	2	1	0	1	0	0	0	0	0	0	0	3	1	2	2.83333	2	2.1	4	2.85714	2.27273	3.45455	3.1	3.25	3.5
1193	2	20	2	2	2	2	2	1	0	1	0	0	0	0	0	0	0	3	1	2	2.83333	2	2.1	4	2.85714	2.27273	3.45455	3.1	3.25	3.5
1194	2	20	2	2	2	2	2	1	0	1	0	0	0	0	0	0	0	3	1	2	2.83333	2	2.1	4	2.85714	2.27273	3.45455	3.1	3.25	3.5
1195	2	20	2	2	2	2	2	1	0	1	0	0	0	0	0	0	0	3	1	2	2.83333	2	2.1	4	2.85714	2.27273	3.45455	3.1	3.25	3.5
1196	1	20	1	1	2	2	3	1	1	0	0	1	0	0	0	0	0	7	1	2	1	2	1.3	2.44444	1.74603	2.18182	1.63636	3.9	1.66667	4.6
1197	1	20	1	1	2	2	3	1	1	0	0	1	0	0	0	0	0	7	1	2	1	2	1.3	2.44444	1.74603	2.18182	1.63636	3.9	1.66667	4.6
1198	1	20	1	1	2	2	3	1	1	0	0	1	0	0	0	0	0	7	1	2	1	2	1.3	2.44444	1.74603	2.18182	1.63636	3.9	1.66667	4.6
1199	1	20	1	1	2	2	3	1	1	0	0	1	0	0	0	0	0	7	1	2	1	2	1.3	2.44444	1.74603	2.18182	1.63636	3.9	1.66667	4.6
1200	1	20	1	1	2	2	3	1	1	0	0	1	0	0	0	0	0	7	1	2	1	2	1.3	2.44444	1.74603	2.18182	1.63636	3.9	1.66667	4.6
1201	1	20	1	1	2	2	3	1	1	0	0	1	0	0	0	0	0	7	1	2	1	2	1.3	2.44444	1.74603	2.18182	1.63636	3.9	1.66667	4.6
1202	1	20	1	1	2	2	3	1	1	0	0	1	0	0	0	0	0	7	1	2	1	2	1.3	2.44444	1.74603	2.18182	1.63636	3.9	1.66667	4.6
1203	1	20	1	1	2	2	3	1	1	0	0	1	0	0	0	0	0	7	1	2	1	2	1.3	2.44444	1.74603	2.18182	1.63636	3.9	1.66667	4.6
1204	2	20	1	1	1	1	3	1	1	1	0	0	0	0	0	0	0	2	4	2	2.33333	3	2.6	3.44444	2.46032	2.90909	2.72727	3.7	2.83333	3.8
1205	2	20	1	1	1	1	3	1	1	1	0	0	0	0	0	0	0	2	4	2	2.33333	3	2.6	3.44444	2.46032	2.90909	2.72727	3.7	2.83333	3.8
1206	2	20	1	1	1	1	3	1	1	1	0	0	0	0	0	0	0	2	4	2	2.33333	3	2.6	3.44444	2.46032	2.90909	2.72727	3.7	2.83333	3.8
1208	2	20	1	1	1	1	3	1	1	1	0	0	0	0	0	0	0	2	4	2	2.33333	3	2.6	3.44444	2.46032	2.90909	2.72727	3.7	2.83333	3.8
1209	2	20	1	1	1	1	3	1	1	1	0	0	0	0	0	0	0	2	4	2	2.33333	3	2.6	3.44444	2.46032	2.90909	2.72727	3.7	2.83333	3.8
1210	2	20	1	1	1	1	3	1	1	1	0	0	0	0	0	0	0	2	4	2	2.33333	3	2.6	3.44444	2.46032	2.90909	2.72727	3.7	2.83333	3.8
1211	2	20	1	1	1	1	3	1	1	1	0	0	0	0	0	0	0	2	4	2	2.33333	3	2.6	3.44444	2.46032	2.90909	2.72727	3.7	2.83333	3.8
1212	2	20	1	1	1	1	3	1	1	1	0	0	0	0	0	0	0	2	4	2	2.33333	3	2.6	3.44444	2.46032	2.90909	2.72727	3.7	2.83333	3.8
1213	1	20	1	1	2	2	3	1	1	0	0	1	0	0	0	0	0	7	1	2	1	2	1.3	2.44444	1.74603	2.18182	1.63636	3.9	1.66667	4.6
1214	1	20	1	1	2	2	3	1	1	0	0	1	0	0	0	0	0	7	1	2	1	2	1.3	2.44444	1.74603	2.18182	1.63636	3.9	1.66667	4.6
1215	1	20	1	1	2	2	3	1	1	0	0	1	0	0	0	0	0	7	1	2	1	2	1.3	2.44444	1.74603	2.18182	1.63636	3.9	1.66667	4.6
1221	1	20	1	1	2	2	3	1	1	0	0	1	0	0	0	0	0	7	1	2	1	2	1.3	2.44444	1.74603	2.18182	1.63636	3.9	1.66667	4.6
1222	1	20	1	1	2	2	3	1	1	0	0	1	0	0	0	0	0	7	1	2	1	2	1.3	2.44444	1.74603	2.18182	1.63636	3.9	1.66667	4.6
1223	1	20	1	1	2	2	3	1	1	0	0	1	0	0	0	0	0	7	1	2	1	2	1.3	2.44444	1.74603	2.18182	1.63636	3.9	1.66667	4.6
1224	1	20	1	1	2	2	3	1	1	0	0	1	0	0	0	0	0	7	1	2	1	2	1.3	2.44444	1.74603	2.18182	1.63636	3.9	1.66667	4.6
1226	1	20	1	1	2	2	3	1	1	0	0	1	0	0	0	0	0	7	1	2	1	2	1.3	2.44444	1.74603	2.18182	1.63636	3.9	1.66667	4.6
1227	2	21	2	2	1	2	3	1	1	1	0	1	1	0	1	0	0	6	3	1	3.16667	4	3.5	6	4.28571	4	3.36364	4	3.08333	3.3
1228	2	21	2	2	1	2	3	1	1	1	0	1	1	0	1	0	0	6	3	1	3.16667	4	3.5	6	4.28571	4	3.36364	4	3.08333	3.3
1229	2	21	2	2	1	2	3	1	1	1	0	1	1	0	1	0	0	6	3	1	3.16667	4	3.5	6	4.28571	4	3.36364	4	3.08333	3.3
1231	2	21	2	2	1	2	3	1	1	1	0	1	1	0	1	0	0	6	3	1	3.16667	4	3.5	6	4.28571	4	3.36364	4	3.08333	3.3
1232	2	19	1	1	1	2	2	1	1	1	1	0	0	0	0	0	0	3	3	2	1	3	2.2	1.33333	0.952381	1.90909	2.18182	4.7	1.83333	3.8
1233	2	19	1	1	1	2	2	1	1	1	1	0	0	0	0	0	0	3	3	2	1	3	2.2	1.33333	0.952381	1.90909	2.18182	4.7	1.83333	3.8
1234	2	19	1	1	1	2	2	1	1	1	1	0	0	0	0	0	0	3	3	2	1	3	2.2	1.33333	0.952381	1.90909	2.18182	4.7	1.83333	3.8
1235	2	19	1	1	1	2	2	1	1	1	1	0	0	0	0	0	0	3	3	2	1	3	2.2	1.33333	0.952381	1.90909	2.18182	4.7	1.83333	3.8
1236	2	19	1	1	1	2	2	1	1	1	1	0	0	0	0	0	0	3	3	2	1	3	2.2	1.33333	0.952381	1.90909	2.18182	4.7	1.83333	3.8
1237	2	19	1	1	1	2	2	1	1	1	1	0	0	0	0	0	0	3	3	2	1	3	2.2	1.33333	0.952381	1.90909	2.18182	4.7	1.83333	3.8
1238	2	19	1	1	1	2	2	1	1	1	1	0	0	0	0	0	0	3	3	2	1	3	2.2	1.33333	0.952381	1.90909	2.18182	4.7	1.83333	3.8
1239	2	19	1	1	1	2	2	1	1	1	1	0	0	0	0	0	0	3	3	2	1	3	2.2	1.33333	0.952381	1.90909	2.18182	4.7	1.83333	3.8
1240	2	20	1	1	1	2	2	1	1	1	0	1	1	0	0	0	0	4	6	2	2.83333	4	4.2	4	2.85714	4.36364	4.18182	1.9	4.66667	1.5
1241	2	20	1	1	1	2	2	1	1	1	0	1	1	0	0	0	0	4	6	2	2.83333	4	4.2	4	2.85714	4.36364	4.18182	1.9	4.66667	1.5
1242	2	20	1	1	1	2	2	1	1	1	0	1	1	0	0	0	0	4	6	2	2.83333	4	4.2	4	2.85714	4.36364	4.18182	1.9	4.66667	1.5
1244	2	20	1	1	1	2	2	1	1	1	0	1	1	0	0	0	0	4	6	2	2.83333	4	4.2	4	2.85714	4.36364	4.18182	1.9	4.66667	1.5
1245	2	19	1	1	2	2	2	1	0	1	0	0	0	0	0	0	0	4	4	1	2.16667	2.75	3.1	4.66667	3.33333	3.54545	3.54545	4.2	2.91667	2.4
1246	2	19	1	1	2	2	2	1	0	1	0	0	0	0	0	0	0	4	4	1	2.16667	2.75	3.1	4.66667	3.33333	3.54545	3.54545	4.2	2.91667	2.4
1247	2	19	1	1	2	2	2	1	0	1	0	0	0	0	0	0	0	4	4	1	2.16667	2.75	3.1	4.66667	3.33333	3.54545	3.54545	4.2	2.91667	2.4
1252	2	19	1	1	2	2	2	1	0	1	0	0	0	0	0	0	0	4	4	1	2.16667	2.75	3.1	4.66667	3.33333	3.54545	3.54545	4.2	2.91667	2.4
1253	2	19	1	1	2	2	2	1	0	1	0	0	0	0	0	0	0	4	4	1	2.16667	2.75	3.1	4.66667	3.33333	3.54545	3.54545	4.2	2.91667	2.4
1254	2	19	1	1	2	2	2	1	0	1	0	0	0	0	0	0	0	4	4	1	2.16667	2.75	3.1	4.66667	3.33333	3.54545	3.54545	4.2	2.91667	2.4
1255	2	19	1	1	2	2	2	1	0	1	0	0	0	0	0	0	0	4	4	1	2.16667	2.75	3.1	4.66667	3.33333	3.54545	3.54545	4.2	2.91667	2.4
1256	2	19	1	1	2	2	2	1	0	1	0	0	0	0	0	0	0	4	4	1	2.16667	2.75	3.1	4.66667	3.33333	3.54545	3.54545	4.2	2.91667	2.4
1257	1	18	1	1	1	2	2	1	1	1	0	0	0	0	0	0	0	7	2	2	1.5	1.5	1.9	1.11111	0.793651	2.45455	2.90909	4.2	3	4.1
1258	1	18	1	1	1	2	2	1	1	1	0	0	0	0	0	0	0	7	2	2	1.5	1.5	1.9	1.11111	0.793651	2.45455	2.90909	4.2	3	4.1
1259	1	18	1	1	1	2	2	1	1	1	0	0	0	0	0	0	0	7	2	2	1.5	1.5	1.9	1.11111	0.793651	2.45455	2.90909	4.2	3	4.1
1260	1	18	1	1	1	2	2	1	1	1	0	0	0	0	0	0	0	7	2	2	1.5	1.5	1.9	1.11111	0.793651	2.45455	2.90909	4.2	3	4.1
1261	1	18	1	1	1	2	2	1	1	1	0	0	0	0	0	0	0	7	2	2	1.5	1.5	1.9	1.11111	0.793651	2.45455	2.90909	4.2	3	4.1
1262	1	18	1	1	1	2	2	1	1	1	0	0	0	0	0	0	0	7	2	2	1.5	1.5	1.9	1.11111	0.793651	2.45455	2.90909	4.2	3	4.1
1263	1	18	1	1	1	2	2	1	1	1	0	0	0	0	0	0	0	7	2	2	1.5	1.5	1.9	1.11111	0.793651	2.45455	2.90909	4.2	3	4.1
1264	1	18	1	1	1	2	2	1	1	1	0	0	0	0	0	0	0	7	2	2	1.5	1.5	1.9	1.11111	0.793651	2.45455	2.90909	4.2	3	4.1
1265	2	18	1	1	2	2	3	1	0	1	0	0	0	0	0	0	0	5	5	2	3.66667	3.25	2.5	4.55556	3.25397	2.36364	3.18182	3.6	3	4.1
1266	2	18	1	1	2	2	3	1	0	1	0	0	0	0	0	0	0	5	5	2	3.66667	3.25	2.5	4.55556	3.25397	2.36364	3.18182	3.6	3	4.1
1267	2	18	1	1	2	2	3	1	0	1	0	0	0	0	0	0	0	5	5	2	3.66667	3.25	2.5	4.55556	3.25397	2.36364	3.18182	3.6	3	4.1
1269	2	18	1	1	2	2	3	1	0	1	0	0	0	0	0	0	0	5	5	2	3.66667	3.25	2.5	4.55556	3.25397	2.36364	3.18182	3.6	3	4.1
1270	2	18	1	1	2	2	3	1	0	1	0	0	0	0	0	0	0	5	5	2	3.66667	3.25	2.5	4.55556	3.25397	2.36364	3.18182	3.6	3	4.1
1271	2	18	1	1	2	2	3	1	0	1	0	0	0	0	0	0	0	5	5	2	3.66667	3.25	2.5	4.55556	3.25397	2.36364	3.18182	3.6	3	4.1
1272	2	18	1	1	2	2	3	1	0	1	0	0	0	0	0	0	0	5	5	2	3.66667	3.25	2.5	4.55556	3.25397	2.36364	3.18182	3.6	3	4.1
1273	2	18	1	1	2	2	3	1	0	1	0	0	0	0	0	0	0	5	5	2	3.66667	3.25	2.5	4.55556	3.25397	2.36364	3.18182	3.6	3	4.1
1274	1	18	1	1	1	2	2	1	1	1	0	0	0	0	0	0	0	7	2	2	1.5	1.5	1.9	1.11111	0.793651	2.45455	2.90909	4.2	3	4.1
1275	1	18	1	1	1	2	2	1	1	1	0	0	0	0	0	0	0	7	2	2	1.5	1.5	1.9	1.11111	0.793651	2.45455	2.90909	4.2	3	4.1
1276	1	18	1	1	1	2	2	1	1	1	0	0	0	0	0	0	0	7	2	2	1.5	1.5	1.9	1.11111	0.793651	2.45455	2.90909	4.2	3	4.1
1277	1	18	1	1	1	2	2	1	1	1	0	0	0	0	0	0	0	7	2	2	1.5	1.5	1.9	1.11111	0.793651	2.45455	2.90909	4.2	3	4.1
1278	1	18	1	1	1	2	2	1	1	1	0	0	0	0	0	0	0	7	2	2	1.5	1.5	1.9	1.11111	0.793651	2.45455	2.90909	4.2	3	4.1
1279	1	18	1	1	1	2	2	1	1	1	0	0	0	0	0	0	0	7	2	2	1.5	1.5	1.9	1.11111	0.793651	2.45455	2.90909	4.2	3	4.1
1280	1	18	1	1	1	2	2	1	1	1	0	0	0	0	0	0	0	7	2	2	1.5	1.5	1.9	1.11111	0.793651	2.45455	2.90909	4.2	3	4.1
1281	1	18	1	1	1	2	2	1	1	1	0	0	0	0	0	0	0	7	2	2	1.5	1.5	1.9	1.11111	0.793651	2.45455	2.90909	4.2	3	4.1
1282	1	18	1	1	1	2	2	1	1	0	0	0	0	0	0	0	0	2	5	1	2	3	1.1	1	0.714286	1.54545	1.63636	4.1	1.83333	4.9
1283	1	18	1	1	1	2	2	1	1	0	0	0	0	0	0	0	0	2	5	1	2	3	1.1	1	0.714286	1.54545	1.63636	4.1	1.83333	4.9
1284	1	18	1	1	1	2	2	1	1	0	0	0	0	0	0	0	0	2	5	1	2	3	1.1	1	0.714286	1.54545	1.63636	4.1	1.83333	4.9
1285	1	18	1	1	1	2	2	1	1	0	0	0	0	0	0	0	0	2	5	1	2	3	1.1	1	0.714286	1.54545	1.63636	4.1	1.83333	4.9
1286	1	18	1	1	1	2	2	1	1	0	0	0	0	0	0	0	0	2	5	1	2	3	1.1	1	0.714286	1.54545	1.63636	4.1	1.83333	4.9
1287	1	18	1	1	1	2	2	1	1	0	0	0	0	0	0	0	0	2	5	1	2	3	1.1	1	0.714286	1.54545	1.63636	4.1	1.83333	4.9
1288	1	18	1	1	1	2	2	1	1	0	0	0	0	0	0	0	0	2	5	1	2	3	1.1	1	0.714286	1.54545	1.63636	4.1	1.83333	4.9
1294	1	18	1	1	1	2	2	1	1	0	0	0	0	0	0	0	0	2	5	1	2	3	1.1	1	0.714286	1.54545	1.63636	4.1	1.83333	4.9
1295	1	18	1	1	1	2	2	1	1	0	0	0	0	0	0	0	0	2	5	1	2	3	1.1	1	0.714286	1.54545	1.63636	4.1	1.83333	4.9
1296	1	18	1	1	1	2	2	1	1	0	0	0	0	0	0	0	0	2	5	1	2	3	1.1	1	0.714286	1.54545	1.63636	4.1	1.83333	4.9
1297	1	18	1	1	1	2	2	1	1	0	0	0	0	0	0	0	0	2	5	1	2	3	1.1	1	0.714286	1.54545	1.63636	4.1	1.83333	4.9
1299	1	18	1	1	1	2	2	1	1	0	0	0	0	0	0	0	0	2	5	1	2	3	1.1	1	0.714286	1.54545	1.63636	4.1	1.83333	4.9
1300	1	18	1	1	1	2	2	1	1	0	0	0	0	0	0	0	0	2	5	1	2	3	1.1	1	0.714286	1.54545	1.63636	4.1	1.83333	4.9
1301	1	18	1	1	1	2	2	1	1	0	0	0	0	0	0	0	0	2	5	1	2	3	1.1	1	0.714286	1.54545	1.63636	4.1	1.83333	4.9
1302	1	18	1	1	1	2	2	1	1	0	0	0	0	0	0	0	0	2	5	1	2	3	1.1	1	0.714286	1.54545	1.63636	4.1	1.83333	4.9
1304	1	18	1	1	1	2	2	1	1	0	0	0	0	0	0	0	0	2	5	1	2	3	1.1	1	0.714286	1.54545	1.63636	4.1	1.83333	4.9
1305	1	20	2	2	2	1	2	1	1	1	0	1	0	1	0	1	0	7	1	2	1	1.75	2.1	3.11111	2.22222	2.63636	3.72727	3.7	2.66667	4.4
1306	1	20	2	2	2	1	2	1	1	1	0	1	0	1	0	1	0	7	1	2	1	1.75	2.1	3.11111	2.22222	2.63636	3.72727	3.7	2.66667	4.4
1307	1	20	2	2	2	1	2	1	1	1	0	1	0	1	0	1	0	7	1	2	1	1.75	2.1	3.11111	2.22222	2.63636	3.72727	3.7	2.66667	4.4
1309	1	20	2	2	2	1	2	1	1	1	0	1	0	1	0	1	0	7	1	2	1	1.75	2.1	3.11111	2.22222	2.63636	3.72727	3.7	2.66667	4.4
1310	1	20	1	1	2	2	2	1	1	0	0	0	0	0	0	0	0	3	3	1	2	2.75	2.1	3.44444	2.46032	2.72727	2	4.2	2.83333	3.9
1311	1	20	1	1	2	2	2	1	1	0	0	0	0	0	0	0	0	3	3	1	2	2.75	2.1	3.44444	2.46032	2.72727	2	4.2	2.83333	3.9
1312	1	20	1	1	2	2	2	1	1	0	0	0	0	0	0	0	0	3	3	1	2	2.75	2.1	3.44444	2.46032	2.72727	2	4.2	2.83333	3.9
1315	1	20	1	1	2	2	2	1	1	0	0	0	0	0	0	0	0	3	3	1	2	2.75	2.1	3.44444	2.46032	2.72727	2	4.2	2.83333	3.9
1316	2	20	1	1	2	2	3	1	1	1	1	0	0	0	0	0	0	3	3	2	4	2	1	4	2.85714	2.63636	3.09091	3	3.41667	2.4
1317	2	20	1	1	2	2	3	1	1	1	1	0	0	0	0	0	0	3	3	2	4	2	1	4	2.85714	2.63636	3.09091	3	3.41667	2.4
1318	2	20	1	1	2	2	3	1	1	1	1	0	0	0	0	0	0	3	3	2	4	2	1	4	2.85714	2.63636	3.09091	3	3.41667	2.4
1319	2	20	1	1	2	2	3	1	1	1	1	0	0	0	0	0	0	3	3	2	4	2	1	4	2.85714	2.63636	3.09091	3	3.41667	2.4
1320	2	20	1	1	2	2	3	1	1	1	1	0	0	0	0	0	0	3	3	2	4	2	1	4	2.85714	2.63636	3.09091	3	3.41667	2.4
1321	2	20	1	1	2	2	3	1	1	1	1	0	0	0	0	0	0	3	3	2	4	2	1	4	2.85714	2.63636	3.09091	3	3.41667	2.4
1322	2	20	1	1	2	2	3	1	1	1	1	0	0	0	0	0	0	3	3	2	4	2	1	4	2.85714	2.63636	3.09091	3	3.41667	2.4
1323	2	20	1	1	2	2	3	1	1	1	1	0	0	0	0	0	0	3	3	2	4	2	1	4	2.85714	2.63636	3.09091	3	3.41667	2.4
1324	2	20	1	1	1	2	2	1	0	1	0	0	0	0	0	0	0	5	7	1	1.83333	2.75	1.8	3.22222	2.30159	2.81818	2.18182	3.8	2.58333	3.3
1325	2	20	1	1	1	2	2	1	0	1	0	0	0	0	0	0	0	5	7	1	1.83333	2.75	1.8	3.22222	2.30159	2.81818	2.18182	3.8	2.58333	3.3
1326	2	20	1	1	1	2	2	1	0	1	0	0	0	0	0	0	0	5	7	1	1.83333	2.75	1.8	3.22222	2.30159	2.81818	2.18182	3.8	2.58333	3.3
1327	2	20	1	1	1	2	2	1	0	1	0	0	0	0	0	0	0	5	7	1	1.83333	2.75	1.8	3.22222	2.30159	2.81818	2.18182	3.8	2.58333	3.3
1328	2	20	1	1	1	2	2	1	0	1	0	0	0	0	0	0	0	5	7	1	1.83333	2.75	1.8	3.22222	2.30159	2.81818	2.18182	3.8	2.58333	3.3
1329	2	20	1	1	1	2	2	1	0	1	0	0	0	0	0	0	0	5	7	1	1.83333	2.75	1.8	3.22222	2.30159	2.81818	2.18182	3.8	2.58333	3.3
1330	2	20	1	1	1	2	2	1	0	1	0	0	0	0	0	0	0	5	7	1	1.83333	2.75	1.8	3.22222	2.30159	2.81818	2.18182	3.8	2.58333	3.3
1334	2	20	1	1	1	2	2	1	0	1	0	0	0	0	0	0	0	5	7	1	1.83333	2.75	1.8	3.22222	2.30159	2.81818	2.18182	3.8	2.58333	3.3
1335	1	18	1	1	1	1	3	1	1	0	0	1	0	1	0	1	0	5	2	2	1	2	1.9	3.33333	2.38095	2.90909	3	4	2.83333	3.2
1336	1	18	1	1	1	1	3	1	1	0	0	1	0	1	0	1	0	5	2	2	1	2	1.9	3.33333	2.38095	2.90909	3	4	2.83333	3.2
1337	1	18	1	1	1	1	3	1	1	0	0	1	0	1	0	1	0	5	2	2	1	2	1.9	3.33333	2.38095	2.90909	3	4	2.83333	3.2
1338	1	18	1	1	1	1	3	1	1	0	0	1	0	1	0	1	0	5	2	2	1	2	1.9	3.33333	2.38095	2.90909	3	4	2.83333	3.2
1339	1	18	2	1	1	2	4	1	1	1	1	1	1	1	1	1	0	1	1	2	5	2.25	1.4	1	0.714286	1.45455	1.36364	1	1.91667	3.5
1340	1	18	2	1	1	2	4	1	1	1	1	1	1	1	1	1	0	1	1	2	5	2.25	1.4	1	0.714286	1.45455	1.36364	1	1.91667	3.5
1341	1	18	2	1	1	2	4	1	1	1	1	1	1	1	1	1	0	1	1	2	5	2.25	1.4	1	0.714286	1.45455	1.36364	1	1.91667	3.5
1342	1	18	2	1	1	2	4	1	1	1	1	1	1	1	1	1	0	1	1	2	5	2.25	1.4	1	0.714286	1.45455	1.36364	1	1.91667	3.5
1343	1	18	2	1	1	2	4	1	1	1	1	1	1	1	1	1	0	1	1	2	5	2.25	1.4	1	0.714286	1.45455	1.36364	1	1.91667	3.5
1344	1	18	2	1	1	2	4	1	1	1	1	1	1	1	1	1	0	1	1	2	5	2.25	1.4	1	0.714286	1.45455	1.36364	1	1.91667	3.5
1345	1	18	2	1	1	2	4	1	1	1	1	1	1	1	1	1	0	1	1	2	5	2.25	1.4	1	0.714286	1.45455	1.36364	1	1.91667	3.5
1347	1	18	2	1	1	2	4	1	1	1	1	1	1	1	1	1	0	1	1	2	5	2.25	1.4	1	0.714286	1.45455	1.36364	1	1.91667	3.5
1348	2	19	1	1	2	1	3	1	1	1	0	0	0	0	0	0	0	6	3	1	4.66667	3	3.2	4.55556	3.25397	3	3.18182	3.5	3.33333	3.7
1349	2	19	1	1	2	1	3	1	1	1	0	0	0	0	0	0	0	6	3	1	4.66667	3	3.2	4.55556	3.25397	3	3.18182	3.5	3.33333	3.7
1350	2	19	1	1	2	1	3	1	1	1	0	0	0	0	0	0	0	6	3	1	4.66667	3	3.2	4.55556	3.25397	3	3.18182	3.5	3.33333	3.7
1352	2	19	1	1	2	1	3	1	1	1	0	0	0	0	0	0	0	6	3	1	4.66667	3	3.2	4.55556	3.25397	3	3.18182	3.5	3.33333	3.7
1353	2	19	1	1	2	2	3	1	1	1	0	0	0	0	0	0	0	6	4	1	4.66667	3	3.2	4.44444	3.1746	3	3.18182	3.4	3.33333	3.7
1354	2	19	1	1	2	2	3	1	1	1	0	0	0	0	0	0	0	6	4	1	4.66667	3	3.2	4.44444	3.1746	3	3.18182	3.4	3.33333	3.7
1355	2	19	1	1	2	2	3	1	1	1	0	0	0	0	0	0	0	6	4	1	4.66667	3	3.2	4.44444	3.1746	3	3.18182	3.4	3.33333	3.7
1357	2	19	1	1	2	2	3	1	1	1	0	0	0	0	0	0	0	6	4	1	4.66667	3	3.2	4.44444	3.1746	3	3.18182	3.4	3.33333	3.7
1358	2	19	1	1	2	2	3	1	1	1	0	0	0	0	0	0	0	6	4	1	4.66667	3	3.2	4.44444	3.1746	3	3.18182	3.4	3.33333	3.7
1359	2	19	1	1	2	2	3	1	1	1	0	0	0	0	0	0	0	6	4	1	4.66667	3	3.2	4.44444	3.1746	3	3.18182	3.4	3.33333	3.7
1360	2	19	1	1	2	2	3	1	1	1	0	0	0	0	0	0	0	6	4	1	4.66667	3	3.2	4.44444	3.1746	3	3.18182	3.4	3.33333	3.7
1362	2	19	1	1	2	2	3	1	1	1	0	0	0	0	0	0	0	6	4	1	4.66667	3	3.2	4.44444	3.1746	3	3.18182	3.4	3.33333	3.7
1363	2	19	2	2	2	2	4	1	1	1	0	1	0	0	0	0	0	5	4	2	4.16667	3.5	2.7	3.33333	2.38095	3.09091	3.18182	4.7	3.25	3.9
1364	2	19	2	2	2	2	4	1	1	1	0	1	0	0	0	0	0	5	4	2	4.16667	3.5	2.7	3.33333	2.38095	3.09091	3.18182	4.7	3.25	3.9
1365	2	19	2	2	2	2	4	1	1	1	0	1	0	0	0	0	0	5	4	2	4.16667	3.5	2.7	3.33333	2.38095	3.09091	3.18182	4.7	3.25	3.9
1368	2	19	2	2	2	2	4	1	1	1	0	1	0	0	0	0	0	5	4	2	4.16667	3.5	2.7	3.33333	2.38095	3.09091	3.18182	4.7	3.25	3.9
1369	1	19	1	1	1	2	3	1	0	1	0	1	0	0	0	0	0	4	4	1	4	3	3	4	2.85714	3	3	3	3	4.2
1370	1	19	1	1	1	2	3	1	0	1	0	1	0	0	0	0	0	4	4	1	4	3	3	4	2.85714	3	3	3	3	4.2
1371	1	19	1	1	1	2	3	1	0	1	0	1	0	0	0	0	0	4	4	1	4	3	3	4	2.85714	3	3	3	3	4.2
1372	1	19	1	1	1	2	3	1	0	1	0	1	0	0	0	0	0	4	4	1	4	3	3	4	2.85714	3	3	3	3	4.2
1373	2	19	1	1	2	2	2	1	1	1	0	0	0	0	0	0	0	5	3	1	4.5	3	3.2	4.33333	3.09524	2.72727	3.09091	3	3	3.1
1374	2	19	1	1	2	2	2	1	1	1	0	0	0	0	0	0	0	5	3	1	4.5	3	3.2	4.33333	3.09524	2.72727	3.09091	3	3	3.1
1375	2	19	1	1	2	2	2	1	1	1	0	0	0	0	0	0	0	5	3	1	4.5	3	3.2	4.33333	3.09524	2.72727	3.09091	3	3	3.1
1381	2	19	1	1	2	2	2	1	1	1	0	0	0	0	0	0	0	5	3	1	4.5	3	3.2	4.33333	3.09524	2.72727	3.09091	3	3	3.1
1382	1	21	2	2	2	1	2	1	1	1	0	0	0	0	1	0	0	5	2	2	2.83333	3.5	2.7	4.66667	3.33333	3.27273	3.09091	3.9	3	3
1383	1	21	2	2	2	1	2	1	1	1	0	0	0	0	1	0	0	5	2	2	2.83333	3.5	2.7	4.66667	3.33333	3.27273	3.09091	3.9	3	3
1384	1	21	2	2	2	1	2	1	1	1	0	0	0	0	1	0	0	5	2	2	2.83333	3.5	2.7	4.66667	3.33333	3.27273	3.09091	3.9	3	3
1385	1	21	2	2	2	1	2	1	1	1	0	0	0	0	1	0	0	5	2	2	2.83333	3.5	2.7	4.66667	3.33333	3.27273	3.09091	3.9	3	3
1386	2	19	1	1	1	1	3	1	1	1	0	0	0	0	1	0	0	5	1	2	1.33333	2.75	1.6	1.44444	1.03175	2.54545	2.18182	3.4	1.66667	4.6
1387	2	19	1	1	1	1	3	1	1	1	0	0	0	0	1	0	0	5	1	2	1.33333	2.75	1.6	1.44444	1.03175	2.54545	2.18182	3.4	1.66667	4.6
1388	2	19	1	1	1	1	3	1	1	1	0	0	0	0	1	0	0	5	1	2	1.33333	2.75	1.6	1.44444	1.03175	2.54545	2.18182	3.4	1.66667	4.6
1389	2	19	1	1	1	1	3	1	1	1	0	0	0	0	1	0	0	5	1	2	1.33333	2.75	1.6	1.44444	1.03175	2.54545	2.18182	3.4	1.66667	4.6
1390	2	19	1	1	1	1	3	1	1	1	0	0	0	0	1	0	0	5	1	2	1.33333	2.75	1.6	1.44444	1.03175	2.54545	2.18182	3.4	1.66667	4.6
1391	2	19	1	1	1	1	3	1	1	1	0	0	0	0	1	0	0	5	1	2	1.33333	2.75	1.6	1.44444	1.03175	2.54545	2.18182	3.4	1.66667	4.6
1392	2	19	1	1	1	1	3	1	1	1	0	0	0	0	1	0	0	5	1	2	1.33333	2.75	1.6	1.44444	1.03175	2.54545	2.18182	3.4	1.66667	4.6
1396	2	19	1	1	1	1	3	1	1	1	0	0	0	0	1	0	0	5	1	2	1.33333	2.75	1.6	1.44444	1.03175	2.54545	2.18182	3.4	1.66667	4.6
1397	2	19	1	1	1	1	3	1	1	1	0	0	0	0	1	0	0	5	1	2	1.33333	2.75	1.6	1.44444	1.03175	2.54545	2.18182	3.4	1.66667	4.6
1398	2	19	1	1	1	1	3	1	1	1	0	0	0	0	1	0	0	5	1	2	1.33333	2.75	1.6	1.44444	1.03175	2.54545	2.18182	3.4	1.66667	4.6
1399	2	19	1	1	1	1	3	1	1	1	0	0	0	0	1	0	0	5	1	2	1.33333	2.75	1.6	1.44444	1.03175	2.54545	2.18182	3.4	1.66667	4.6
1403	2	19	1	1	1	1	3	1	1	1	0	0	0	0	1	0	0	5	1	2	1.33333	2.75	1.6	1.44444	1.03175	2.54545	2.18182	3.4	1.66667	4.6
1404	2	19	1	1	1	1	3	1	1	1	0	0	0	0	1	0	0	5	1	2	1.33333	2.75	1.6	1.44444	1.03175	2.54545	2.18182	3.4	1.66667	4.6
1405	2	19	1	1	1	1	3	1	1	1	0	0	0	0	1	0	0	5	1	2	1.33333	2.75	1.6	1.44444	1.03175	2.54545	2.18182	3.4	1.66667	4.6
1406	2	19	1	1	1	1	3	1	1	1	0	0	0	0	1	0	0	5	1	2	1.33333	2.75	1.6	1.44444	1.03175	2.54545	2.18182	3.4	1.66667	4.6
1407	2	19	1	1	1	1	3	1	1	1	0	0	0	0	1	0	0	5	1	2	1.33333	2.75	1.6	1.44444	1.03175	2.54545	2.18182	3.4	1.66667	4.6
1408	1	20	2	2	1	2	3	0	1	0	0	1	0	0	0	0	0	7	2	1	3.66667	1.75	2.5	3.88889	2.77778	3.45455	3.27273	3.3	3.33333	2.3
1409	1	20	2	2	1	2	3	0	1	0	0	1	0	0	0	0	0	7	2	1	3.66667	1.75	2.5	3.88889	2.77778	3.45455	3.27273	3.3	3.33333	2.3
1410	1	20	2	2	1	2	3	0	1	0	0	1	0	0	0	0	0	7	2	1	3.66667	1.75	2.5	3.88889	2.77778	3.45455	3.27273	3.3	3.33333	2.3
1411	1	20	2	2	1	2	3	0	1	0	0	1	0	0	0	0	0	7	2	1	3.66667	1.75	2.5	3.88889	2.77778	3.45455	3.27273	3.3	3.33333	2.3
1412	2	18	1	1	1	1	4	1	1	1	0	1	0	0	0	1	0	4	9	1	1	3	1	1.33333	0.952381	1.72727	2.09091	4.4	2.16667	3.9
1413	2	18	1	1	1	1	4	1	1	1	0	1	0	0	0	1	0	4	9	1	1	3	1	1.33333	0.952381	1.72727	2.09091	4.4	2.16667	3.9
1414	2	18	1	1	1	1	4	1	1	1	0	1	0	0	0	1	0	4	9	1	1	3	1	1.33333	0.952381	1.72727	2.09091	4.4	2.16667	3.9
1416	2	18	1	1	1	1	4	1	1	1	0	1	0	0	0	1	0	4	9	1	1	3	1	1.33333	0.952381	1.72727	2.09091	4.4	2.16667	3.9
1417	2	18	1	1	1	1	4	1	1	1	0	1	0	0	0	1	0	4	9	1	1	3	1	1.33333	0.952381	1.72727	2.09091	4.4	2.16667	3.9
1418	2	18	1	1	1	1	4	1	1	1	0	1	0	0	0	1	0	4	9	1	1	3	1	1.33333	0.952381	1.72727	2.09091	4.4	2.16667	3.9
1419	2	18	1	1	1	1	4	1	1	1	0	1	0	0	0	1	0	4	9	1	1	3	1	1.33333	0.952381	1.72727	2.09091	4.4	2.16667	3.9
1421	2	18	1	1	1	1	4	1	1	1	0	1	0	0	0	1	0	4	9	1	1	3	1	1.33333	0.952381	1.72727	2.09091	4.4	2.16667	3.9
1422	2	19	1	1	2	2	2	1	1	1	0	1	0	0	0	0	0	6	1	2	3.5	3.25	2.3	3.44444	2.46032	2.63636	2.72727	4.5	2.66667	4.3
1423	2	19	1	1	2	2	2	1	1	1	0	1	0	0	0	0	0	6	1	2	3.5	3.25	2.3	3.44444	2.46032	2.63636	2.72727	4.5	2.66667	4.3
1424	2	19	1	1	2	2	2	1	1	1	0	1	0	0	0	0	0	6	1	2	3.5	3.25	2.3	3.44444	2.46032	2.63636	2.72727	4.5	2.66667	4.3
1426	2	19	1	1	2	2	2	1	1	1	0	1	0	0	0	0	0	6	1	2	3.5	3.25	2.3	3.44444	2.46032	2.63636	2.72727	4.5	2.66667	4.3
1427	2	19	2	1	1	2	3	1	1	1	0	1	0	0	0	0	0	3	2	2	1.16667	3.25	1.9	1.77778	1.26984	1.45455	1.36364	4.4	1.66667	4.3
1428	2	19	2	1	1	2	3	1	1	1	0	1	0	0	0	0	0	3	2	2	1.16667	3.25	1.9	1.77778	1.26984	1.45455	1.36364	4.4	1.66667	4.3
1429	2	19	2	1	1	2	3	1	1	1	0	1	0	0	0	0	0	3	2	2	1.16667	3.25	1.9	1.77778	1.26984	1.45455	1.36364	4.4	1.66667	4.3
1432	2	19	2	1	1	2	3	1	1	1	0	1	0	0	0	0	0	3	2	2	1.16667	3.25	1.9	1.77778	1.26984	1.45455	1.36364	4.4	1.66667	4.3
1433	2	19	2	1	1	2	3	1	1	1	0	1	0	0	0	0	0	3	2	2	1.16667	3.25	1.9	1.77778	1.26984	1.45455	1.36364	4.4	1.66667	4.3
1434	2	19	2	1	1	2	3	1	1	1	0	1	0	0	0	0	0	3	2	2	1.16667	3.25	1.9	1.77778	1.26984	1.45455	1.36364	4.4	1.66667	4.3
1435	2	19	2	1	1	2	3	1	1	1	0	1	0	0	0	0	0	3	2	2	1.16667	3.25	1.9	1.77778	1.26984	1.45455	1.36364	4.4	1.66667	4.3
1436	2	19	2	1	1	2	3	1	1	1	0	1	0	0	0	0	0	3	2	2	1.16667	3.25	1.9	1.77778	1.26984	1.45455	1.36364	4.4	1.66667	4.3
1437	1	19	1	1	2	2	3	1	1	1	1	0	0	0	0	0	0	6	4	2	1.83333	4	2.6	5.55556	3.96825	3.09091	3.18182	4.4	3.25	4.1
1438	1	19	1	1	2	2	3	1	1	1	1	0	0	0	0	0	0	6	4	2	1.83333	4	2.6	5.55556	3.96825	3.09091	3.18182	4.4	3.25	4.1
1439	1	19	1	1	2	2	3	1	1	1	1	0	0	0	0	0	0	6	4	2	1.83333	4	2.6	5.55556	3.96825	3.09091	3.18182	4.4	3.25	4.1
1443	1	19	1	1	2	2	3	1	1	1	1	0	0	0	0	0	0	6	4	2	1.83333	4	2.6	5.55556	3.96825	3.09091	3.18182	4.4	3.25	4.1
1444	2	19	2	1	1	2	3	1	1	1	0	1	0	0	0	0	0	3	2	2	1.16667	3.25	1.9	1.77778	1.26984	1.45455	1.36364	4.4	1.66667	4.3
1445	2	19	2	1	1	2	3	1	1	1	0	1	0	0	0	0	0	3	2	2	1.16667	3.25	1.9	1.77778	1.26984	1.45455	1.36364	4.4	1.66667	4.3
1446	2	19	2	1	1	2	3	1	1	1	0	1	0	0	0	0	0	3	2	2	1.16667	3.25	1.9	1.77778	1.26984	1.45455	1.36364	4.4	1.66667	4.3
1447	2	19	2	1	1	2	3	1	1	1	0	1	0	0	0	0	0	3	2	2	1.16667	3.25	1.9	1.77778	1.26984	1.45455	1.36364	4.4	1.66667	4.3
1448	2	19	2	1	1	2	3	1	1	1	0	1	0	0	0	0	0	3	2	2	1.16667	3.25	1.9	1.77778	1.26984	1.45455	1.36364	4.4	1.66667	4.3
1449	2	19	2	1	1	2	3	1	1	1	0	1	0	0	0	0	0	3	2	2	1.16667	3.25	1.9	1.77778	1.26984	1.45455	1.36364	4.4	1.66667	4.3
1450	2	19	2	1	1	2	3	1	1	1	0	1	0	0	0	0	0	3	2	2	1.16667	3.25	1.9	1.77778	1.26984	1.45455	1.36364	4.4	1.66667	4.3
1451	2	19	2	1	1	2	3	1	1	1	0	1	0	0	0	0	0	3	2	2	1.16667	3.25	1.9	1.77778	1.26984	1.45455	1.36364	4.4	1.66667	4.3
1452	2	18	1	1	1	2	1	1	1	1	1	1	0	0	0	0	0	7	1	2	1	3	1	1	0.714286	1.72727	1.72727	3.3	1.5	3.6
1453	2	18	1	1	1	2	1	1	1	1	1	1	0	0	0	0	0	7	1	2	1	3	1	1	0.714286	1.72727	1.72727	3.3	1.5	3.6
1454	2	18	1	1	1	2	1	1	1	1	1	1	0	0	0	0	0	7	1	2	1	3	1	1	0.714286	1.72727	1.72727	3.3	1.5	3.6
1458	2	18	1	1	1	2	1	1	1	1	1	1	0	0	0	0	0	7	1	2	1	3	1	1	0.714286	1.72727	1.72727	3.3	1.5	3.6
1459	2	18	1	1	1	2	1	1	1	1	1	1	0	0	0	0	0	7	1	2	1	3	1	1	0.714286	1.72727	1.72727	3.3	1.5	3.6
1460	2	18	1	1	1	2	1	1	1	1	1	1	0	0	0	0	0	7	1	2	1	3	1	1	0.714286	1.72727	1.72727	3.3	1.5	3.6
1461	2	18	1	1	1	2	1	1	1	1	1	1	0	0	0	0	0	7	1	2	1	3	1	1	0.714286	1.72727	1.72727	3.3	1.5	3.6
1465	2	18	1	1	1	2	1	1	1	1	1	1	0	0	0	0	0	7	1	2	1	3	1	1	0.714286	1.72727	1.72727	3.3	1.5	3.6
1466	2	20	1	1	1	2	3	1	0	0	0	1	0	0	0	0	1	7	1	2	3.16667	3.25	3.1	3.22222	2.30159	3.72727	3.27273	4.7	4	3
1467	2	20	1	1	1	2	3	1	0	0	0	1	0	0	0	0	1	7	1	2	3.16667	3.25	3.1	3.22222	2.30159	3.72727	3.27273	4.7	4	3
1468	2	20	1	1	1	2	3	1	0	0	0	1	0	0	0	0	1	7	1	2	3.16667	3.25	3.1	3.22222	2.30159	3.72727	3.27273	4.7	4	3
1470	2	20	1	1	1	2	3	1	0	0	0	1	0	0	0	0	1	7	1	2	3.16667	3.25	3.1	3.22222	2.30159	3.72727	3.27273	4.7	4	3
1471	2	18	1	1	2	2	3	1	1	1	0	0	0	0	0	0	0	2	2	1	3.66667	3.25	2.3	3.22222	2.30159	3.09091	3.63636	3.9	3.25	3.2
1472	2	18	1	1	2	2	3	1	1	1	0	0	0	0	0	0	0	2	2	1	3.66667	3.25	2.3	3.22222	2.30159	3.09091	3.63636	3.9	3.25	3.2
1473	2	18	1	1	2	2	3	1	1	1	0	0	0	0	0	0	0	2	2	1	3.66667	3.25	2.3	3.22222	2.30159	3.09091	3.63636	3.9	3.25	3.2
1478	2	18	1	1	2	2	3	1	1	1	0	0	0	0	0	0	0	2	2	1	3.66667	3.25	2.3	3.22222	2.30159	3.09091	3.63636	3.9	3.25	3.2
1479	2	18	1	1	2	2	3	1	1	1	0	0	0	0	0	0	0	2	2	1	3.66667	3.25	2.3	3.22222	2.30159	3.09091	3.63636	3.9	3.25	3.2
1480	2	18	1	1	2	2	3	1	1	1	0	0	0	0	0	0	0	2	2	1	3.66667	3.25	2.3	3.22222	2.30159	3.09091	3.63636	3.9	3.25	3.2
1481	2	18	1	1	2	2	3	1	1	1	0	0	0	0	0	0	0	2	2	1	3.66667	3.25	2.3	3.22222	2.30159	3.09091	3.63636	3.9	3.25	3.2
1482	2	18	1	1	2	2	3	1	1	1	0	0	0	0	0	0	0	2	2	1	3.66667	3.25	2.3	3.22222	2.30159	3.09091	3.63636	3.9	3.25	3.2
1483	2	18	1	1	2	2	3	1	1	1	0	0	0	0	0	0	0	2	2	1	3.66667	3.25	2.3	3.22222	2.30159	3.09091	3.63636	3.9	3.25	3.2
1484	2	18	1	1	2	2	3	1	1	1	0	0	0	0	0	0	0	2	2	1	3.66667	3.25	2.3	3.22222	2.30159	3.09091	3.63636	3.9	3.25	3.2
1485	2	18	1	1	2	2	3	1	1	1	0	0	0	0	0	0	0	2	2	1	3.66667	3.25	2.3	3.22222	2.30159	3.09091	3.63636	3.9	3.25	3.2
1488	2	18	1	1	2	2	3	1	1	1	0	0	0	0	0	0	0	2	2	1	3.66667	3.25	2.3	3.22222	2.30159	3.09091	3.63636	3.9	3.25	3.2
1489	2	18	1	1	2	2	3	1	1	1	0	0	0	0	0	0	0	2	2	1	3.66667	3.25	2.3	3.22222	2.30159	3.09091	3.63636	3.9	3.25	3.2
1490	2	18	1	1	2	2	3	1	1	1	0	0	0	0	0	0	0	2	2	1	3.66667	3.25	2.3	3.22222	2.30159	3.09091	3.63636	3.9	3.25	3.2
1491	2	18	1	1	2	2	3	1	1	1	0	0	0	0	0	0	0	2	2	1	3.66667	3.25	2.3	3.22222	2.30159	3.09091	3.63636	3.9	3.25	3.2
1492	2	18	1	1	2	2	3	1	1	1	0	0	0	0	0	0	0	2	2	1	3.66667	3.25	2.3	3.22222	2.30159	3.09091	3.63636	3.9	3.25	3.2
1493	1	19	2	2	1	2	3	1	1	1	0	1	0	0	0	1	0	5	5	1	3.33333	3.25	3.4	4.88889	3.49206	3.36364	3.27273	4.2	2.75	3.2
1494	1	19	2	2	1	2	3	1	1	1	0	1	0	0	0	1	0	5	5	1	3.33333	3.25	3.4	4.88889	3.49206	3.36364	3.27273	4.2	2.75	3.2
1495	1	19	2	2	1	2	3	1	1	1	0	1	0	0	0	1	0	5	5	1	3.33333	3.25	3.4	4.88889	3.49206	3.36364	3.27273	4.2	2.75	3.2
1496	1	19	2	2	1	2	3	1	1	1	0	1	0	0	0	1	0	5	5	1	3.33333	3.25	3.4	4.88889	3.49206	3.36364	3.27273	4.2	2.75	3.2
1497	2	20	1	1	1	2	2	1	0	1	0	0	0	0	0	0	0	5	3	2	2	2	2.1	3.44444	2.46032	2.45455	3.09091	4	3.33333	3.3
1498	2	20	1	1	1	2	2	1	0	1	0	0	0	0	0	0	0	5	3	2	2	2	2.1	3.44444	2.46032	2.45455	3.09091	4	3.33333	3.3
1499	2	20	1	1	1	2	2	1	0	1	0	0	0	0	0	0	0	5	3	2	2	2	2.1	3.44444	2.46032	2.45455	3.09091	4	3.33333	3.3
1500	2	20	1	1	1	2	2	1	0	1	0	0	0	0	0	0	0	5	3	2	2	2	2.1	3.44444	2.46032	2.45455	3.09091	4	3.33333	3.3
1501	2	19	1	1	1	1	2	1	1	1	0	0	0	0	0	0	0	7	2	2	1.33333	4	2.3	5.33333	3.80952	4	4.09091	5	3.5	3.2
1502	2	19	1	1	1	1	2	1	1	1	0	0	0	0	0	0	0	7	2	2	1.33333	4	2.3	5.33333	3.80952	4	4.09091	5	3.5	3.2
1503	2	19	1	1	1	1	2	1	1	1	0	0	0	0	0	0	0	7	2	2	1.33333	4	2.3	5.33333	3.80952	4	4.09091	5	3.5	3.2
1505	2	19	1	1	1	1	2	1	1	1	0	0	0	0	0	0	0	7	2	2	1.33333	4	2.3	5.33333	3.80952	4	4.09091	5	3.5	3.2
1506	2	19	1	1	1	1	2	1	1	1	0	0	0	0	0	0	0	7	2	2	1.33333	4	2.3	5.33333	3.80952	4	4.09091	5	3.5	3.2
1507	2	19	1	1	1	1	2	1	1	1	0	0	0	0	0	0	0	7	2	2	1.33333	4	2.3	5.33333	3.80952	4	4.09091	5	3.5	3.2
1508	2	19	1	1	1	1	2	1	1	1	0	0	0	0	0	0	0	7	2	2	1.33333	4	2.3	5.33333	3.80952	4	4.09091	5	3.5	3.2
1509	2	19	1	1	1	1	2	1	1	1	0	0	0	0	0	0	0	7	2	2	1.33333	4	2.3	5.33333	3.80952	4	4.09091	5	3.5	3.2
1510	2	18	1	1	1	2	2	1	0	1	0	0	0	0	0	0	0	6	7	1	1	2	2.1	3.66667	2.61905	2.81818	2.45455	4.8	2.5	4
1511	2	18	1	1	1	2	2	1	0	1	0	0	0	0	0	0	0	6	7	1	1	2	2.1	3.66667	2.61905	2.81818	2.45455	4.8	2.5	4
1512	2	18	1	1	1	2	2	1	0	1	0	0	0	0	0	0	0	6	7	1	1	2	2.1	3.66667	2.61905	2.81818	2.45455	4.8	2.5	4
1513	2	18	1	1	1	2	2	1	0	1	0	0	0	0	0	0	0	6	7	1	1	2	2.1	3.66667	2.61905	2.81818	2.45455	4.8	2.5	4
1514	2	19	2	2	1	2	2	1	0	1	0	0	0	0	0	0	1	2	7	1	2.66667	3.5	3.2	4.11111	2.93651	3.81818	3.72727	4.1	3.41667	3.4
1515	2	19	2	2	1	2	2	1	0	1	0	0	0	0	0	0	1	2	7	1	2.66667	3.5	3.2	4.11111	2.93651	3.81818	3.72727	4.1	3.41667	3.4
1516	2	19	2	2	1	2	2	1	0	1	0	0	0	0	0	0	1	2	7	1	2.66667	3.5	3.2	4.11111	2.93651	3.81818	3.72727	4.1	3.41667	3.4
1520	2	19	2	2	1	2	2	1	0	1	0	0	0	0	0	0	1	2	7	1	2.66667	3.5	3.2	4.11111	2.93651	3.81818	3.72727	4.1	3.41667	3.4
1521	2	19	2	2	1	2	2	1	0	1	0	0	0	0	0	0	1	2	7	1	2.66667	3.5	3.2	4.11111	2.93651	3.81818	3.72727	4.1	3.41667	3.4
1522	2	19	2	2	1	2	2	1	0	1	0	0	0	0	0	0	1	2	7	1	2.66667	3.5	3.2	4.11111	2.93651	3.81818	3.72727	4.1	3.41667	3.4
1523	2	19	2	2	1	2	2	1	0	1	0	0	0	0	0	0	1	2	7	1	2.66667	3.5	3.2	4.11111	2.93651	3.81818	3.72727	4.1	3.41667	3.4
1525	2	19	2	2	1	2	2	1	0	1	0	0	0	0	0	0	1	2	7	1	2.66667	3.5	3.2	4.11111	2.93651	3.81818	3.72727	4.1	3.41667	3.4
1526	2	20	1	1	2	1	2	1	1	1	0	0	0	0	0	0	0	4	1	2	5.33333	1.5	2	2	1.42857	3	3.27273	3.7	3	3
1527	2	20	1	1	2	1	2	1	1	1	0	0	0	0	0	0	0	4	1	2	5.33333	1.5	2	2	1.42857	3	3.27273	3.7	3	3
1528	2	20	1	1	2	1	2	1	1	1	0	0	0	0	0	0	0	4	1	2	5.33333	1.5	2	2	1.42857	3	3.27273	3.7	3	3
1532	2	20	1	1	2	1	2	1	1	1	0	0	0	0	0	0	0	4	1	2	5.33333	1.5	2	2	1.42857	3	3.27273	3.7	3	3
1533	2	20	1	1	2	1	2	1	1	1	0	0	0	0	0	0	0	4	1	2	5.33333	1.5	2	2	1.42857	3	3.27273	3.7	3	3
1534	2	20	1	1	2	1	2	1	1	1	0	0	0	0	0	0	0	4	1	2	5.33333	1.5	2	2	1.42857	3	3.27273	3.7	3	3
1535	2	20	1	1	2	1	2	1	1	1	0	0	0	0	0	0	0	4	1	2	5.33333	1.5	2	2	1.42857	3	3.27273	3.7	3	3
1537	2	20	1	1	2	1	2	1	1	1	0	0	0	0	0	0	0	4	1	2	5.33333	1.5	2	2	1.42857	3	3.27273	3.7	3	3
1538	2	20	1	1	1	2	4	1	1	1	0	0	1	1	1	0	0	4	3	2	1	3.75	2.8	4.33333	3.09524	2.90909	3	3.9	3.75	3.2
1539	2	20	1	1	1	2	4	1	1	1	0	0	1	1	1	0	0	4	3	2	1	3.75	2.8	4.33333	3.09524	2.90909	3	3.9	3.75	3.2
1540	2	20	1	1	1	2	4	1	1	1	0	0	1	1	1	0	0	4	3	2	1	3.75	2.8	4.33333	3.09524	2.90909	3	3.9	3.75	3.2
1544	2	20	1	1	1	2	4	1	1	1	0	0	1	1	1	0	0	4	3	2	1	3.75	2.8	4.33333	3.09524	2.90909	3	3.9	3.75	3.2
1545	1	20	2	1	2	2	3	1	1	1	0	0	0	0	0	0	0	7	8	1	3.83333	3.75	2.9	4.77778	3.4127	3.72727	3.36364	3.6	3.66667	2.9
1546	1	20	2	1	2	2	3	1	1	1	0	0	0	0	0	0	0	7	8	1	3.83333	3.75	2.9	4.77778	3.4127	3.72727	3.36364	3.6	3.66667	2.9
1547	1	20	2	1	2	2	3	1	1	1	0	0	0	0	0	0	0	7	8	1	3.83333	3.75	2.9	4.77778	3.4127	3.72727	3.36364	3.6	3.66667	2.9
1549	1	20	2	1	2	2	3	1	1	1	0	0	0	0	0	0	0	7	8	1	3.83333	3.75	2.9	4.77778	3.4127	3.72727	3.36364	3.6	3.66667	2.9
1550	1	21	1	1	1	1	3	1	1	1	0	0	0	0	0	0	0	4	1	2	2	3	2.9	3.22222	2.30159	3.81818	3.09091	3.8	3.16667	3.2
1551	1	21	1	1	1	1	3	1	1	1	0	0	0	0	0	0	0	4	1	2	2	3	2.9	3.22222	2.30159	3.81818	3.09091	3.8	3.16667	3.2
1552	1	21	1	1	1	1	3	1	1	1	0	0	0	0	0	0	0	4	1	2	2	3	2.9	3.22222	2.30159	3.81818	3.09091	3.8	3.16667	3.2
1553	1	21	1	1	1	1	3	1	1	1	0	0	0	0	0	0	0	4	1	2	2	3	2.9	3.22222	2.30159	3.81818	3.09091	3.8	3.16667	3.2
1554	1	21	1	1	1	1	3	1	1	1	0	0	0	0	0	0	0	4	1	2	2	3	2.9	3.22222	2.30159	3.81818	3.09091	3.8	3.16667	3.2
1555	1	21	1	1	1	1	3	1	1	1	0	0	0	0	0	0	0	4	1	2	2	3	2.9	3.22222	2.30159	3.81818	3.09091	3.8	3.16667	3.2
1556	1	21	1	1	1	1	3	1	1	1	0	0	0	0	0	0	0	4	1	2	2	3	2.9	3.22222	2.30159	3.81818	3.09091	3.8	3.16667	3.2
1557	1	21	1	1	1	1	3	1	1	1	0	0	0	0	0	0	0	4	1	2	2	3	2.9	3.22222	2.30159	3.81818	3.09091	3.8	3.16667	3.2
1558	1	18	1	1	2	2	3	1	1	1	1	1	0	0	0	0	0	5	2	2	3	3	2.9	3.44444	2.46032	2.81818	3.27273	4	2.91667	3.3
1559	1	18	1	1	2	2	3	1	1	1	1	1	0	0	0	0	0	5	2	2	3	3	2.9	3.44444	2.46032	2.81818	3.27273	4	2.91667	3.3
1560	1	18	1	1	2	2	3	1	1	1	1	1	0	0	0	0	0	5	2	2	3	3	2.9	3.44444	2.46032	2.81818	3.27273	4	2.91667	3.3
1562	1	18	1	1	2	2	3	1	1	1	1	1	0	0	0	0	0	5	2	2	3	3	2.9	3.44444	2.46032	2.81818	3.27273	4	2.91667	3.3
1563	1	18	1	1	2	2	3	1	1	1	1	1	0	0	0	0	0	5	2	2	3	3	2.9	3.44444	2.46032	2.81818	3.27273	4	2.91667	3.3
1564	1	18	1	1	2	2	3	1	1	1	1	1	0	0	0	0	0	5	2	2	3	3	2.9	3.44444	2.46032	2.81818	3.27273	4	2.91667	3.3
1565	1	18	1	1	2	2	3	1	1	1	1	1	0	0	0	0	0	5	2	2	3	3	2.9	3.44444	2.46032	2.81818	3.27273	4	2.91667	3.3
1569	1	18	1	1	2	2	3	1	1	1	1	1	0	0	0	0	0	5	2	2	3	3	2.9	3.44444	2.46032	2.81818	3.27273	4	2.91667	3.3
1570	2	18	2	1	1	1	3	1	1	1	0	1	0	0	0	0	0	3	2	2	2.5	3	2.6	3.88889	2.77778	3.09091	3	3.7	2.58333	3.6
1571	2	18	2	1	1	1	3	1	1	1	0	1	0	0	0	0	0	3	2	2	2.5	3	2.6	3.88889	2.77778	3.09091	3	3.7	2.58333	3.6
1572	2	18	2	1	1	1	3	1	1	1	0	1	0	0	0	0	0	3	2	2	2.5	3	2.6	3.88889	2.77778	3.09091	3	3.7	2.58333	3.6
1574	2	18	2	1	1	1	3	1	1	1	0	1	0	0	0	0	0	3	2	2	2.5	3	2.6	3.88889	2.77778	3.09091	3	3.7	2.58333	3.6
1575	2	18	2	1	1	1	3	1	1	1	0	1	0	0	0	0	0	3	2	2	2.5	3	2.6	3.88889	2.77778	3.09091	3	3.7	2.58333	3.6
1576	2	18	2	1	1	1	3	1	1	1	0	1	0	0	0	0	0	3	2	2	2.5	3	2.6	3.88889	2.77778	3.09091	3	3.7	2.58333	3.6
1577	2	18	2	1	1	1	3	1	1	1	0	1	0	0	0	0	0	3	2	2	2.5	3	2.6	3.88889	2.77778	3.09091	3	3.7	2.58333	3.6
1579	2	18	2	1	1	1	3	1	1	1	0	1	0	0	0	0	0	3	2	2	2.5	3	2.6	3.88889	2.77778	3.09091	3	3.7	2.58333	3.6
1580	2	19	1	1	1	1	3	1	0	1	0	0	0	0	0	0	0	6	5	1	1	3.25	2.1	3.77778	2.69841	3.09091	3	4.6	2.83333	4
1581	2	19	1	1	1	1	3	1	0	1	0	0	0	0	0	0	0	6	5	1	1	3.25	2.1	3.77778	2.69841	3.09091	3	4.6	2.83333	4
1582	2	19	1	1	1	1	3	1	0	1	0	0	0	0	0	0	0	6	5	1	1	3.25	2.1	3.77778	2.69841	3.09091	3	4.6	2.83333	4
1586	2	19	1	1	1	1	3	1	0	1	0	0	0	0	0	0	0	6	5	1	1	3.25	2.1	3.77778	2.69841	3.09091	3	4.6	2.83333	4
1587	2	19	1	1	2	2	3	1	1	1	1	0	0	0	0	0	0	4	1	2	4.5	2.5	2.7	4	2.85714	3.18182	3.18182	4	3.33333	3.6
1588	2	19	1	1	2	2	3	1	1	1	1	0	0	0	0	0	0	4	1	2	4.5	2.5	2.7	4	2.85714	3.18182	3.18182	4	3.33333	3.6
1589	2	19	1	1	2	2	3	1	1	1	1	0	0	0	0	0	0	4	1	2	4.5	2.5	2.7	4	2.85714	3.18182	3.18182	4	3.33333	3.6
1591	2	19	1	1	2	2	3	1	1	1	1	0	0	0	0	0	0	4	1	2	4.5	2.5	2.7	4	2.85714	3.18182	3.18182	4	3.33333	3.6
1592	2	19	1	1	2	2	3	1	1	1	1	0	0	0	0	0	0	4	1	2	4.5	2.5	2.7	4	2.85714	3.18182	3.18182	4	3.33333	3.6
1593	2	19	1	1	2	2	3	1	1	1	1	0	0	0	0	0	0	4	1	2	4.5	2.5	2.7	4	2.85714	3.18182	3.18182	4	3.33333	3.6
1594	2	19	1	1	2	2	3	1	1	1	1	0	0	0	0	0	0	4	1	2	4.5	2.5	2.7	4	2.85714	3.18182	3.18182	4	3.33333	3.6
1597	2	19	1	1	2	2	3	1	1	1	1	0	0	0	0	0	0	4	1	2	4.5	2.5	2.7	4	2.85714	3.18182	3.18182	4	3.33333	3.6
1598	1	20	2	2	2	2	2	1	1	1	0	0	0	0	0	0	0	3	5	2	2	1.5	2.5	2.88889	2.06349	2.36364	2.63636	3.2	3.41667	2.4
1599	1	20	2	2	2	2	2	1	1	1	0	0	0	0	0	0	0	3	5	2	2	1.5	2.5	2.88889	2.06349	2.36364	2.63636	3.2	3.41667	2.4
1600	1	20	2	2	2	2	2	1	1	1	0	0	0	0	0	0	0	3	5	2	2	1.5	2.5	2.88889	2.06349	2.36364	2.63636	3.2	3.41667	2.4
1601	1	20	2	2	2	2	2	1	1	1	0	0	0	0	0	0	0	3	5	2	2	1.5	2.5	2.88889	2.06349	2.36364	2.63636	3.2	3.41667	2.4
1602	1	20	1	1	1	1	3	1	1	1	0	0	0	0	0	1	0	3	4	1	3.16667	1.75	1.8	2.44444	1.74603	2.90909	2.90909	3.2	2.66667	3.5
1603	1	20	1	1	1	1	3	1	1	1	0	0	0	0	0	1	0	3	4	1	3.16667	1.75	1.8	2.44444	1.74603	2.90909	2.90909	3.2	2.66667	3.5
1604	1	20	1	1	1	1	3	1	1	1	0	0	0	0	0	1	0	3	4	1	3.16667	1.75	1.8	2.44444	1.74603	2.90909	2.90909	3.2	2.66667	3.5
1607	1	20	1	1	1	1	3	1	1	1	0	0	0	0	0	1	0	3	4	1	3.16667	1.75	1.8	2.44444	1.74603	2.90909	2.90909	3.2	2.66667	3.5
1608	1	20	2	2	2	2	2	1	1	1	0	0	0	0	0	0	0	3	5	2	2	1.5	2.5	2.88889	2.06349	2.36364	2.63636	3.2	3.41667	2.4
1609	1	20	2	2	2	2	2	1	1	1	0	0	0	0	0	0	0	3	5	2	2	1.5	2.5	2.88889	2.06349	2.36364	2.63636	3.2	3.41667	2.4
1610	1	20	2	2	2	2	2	1	1	1	0	0	0	0	0	0	0	3	5	2	2	1.5	2.5	2.88889	2.06349	2.36364	2.63636	3.2	3.41667	2.4
1611	1	20	2	2	2	2	2	1	1	1	0	0	0	0	0	0	0	3	5	2	2	1.5	2.5	2.88889	2.06349	2.36364	2.63636	3.2	3.41667	2.4
1612	1	20	2	2	1	2	2	1	1	1	0	0	0	0	0	0	0	7	9	1	1	2.75	1.7	2.44444	1.74603	4.09091	3.36364	3.8	2.5	4.5
1613	1	20	2	2	1	2	2	1	1	1	0	0	0	0	0	0	0	7	9	1	1	2.75	1.7	2.44444	1.74603	4.09091	3.36364	3.8	2.5	4.5
1614	1	20	2	2	1	2	2	1	1	1	0	0	0	0	0	0	0	7	9	1	1	2.75	1.7	2.44444	1.74603	4.09091	3.36364	3.8	2.5	4.5
1616	1	20	2	2	1	2	2	1	1	1	0	0	0	0	0	0	0	7	9	1	1	2.75	1.7	2.44444	1.74603	4.09091	3.36364	3.8	2.5	4.5
1617	2	20	1	1	2	2	3	1	1	1	0	1	1	0	0	0	0	4	1	2	3.66667	2	2.4	1	0.714286	2.54545	1.72727	3.8	2.91667	4.1
1618	2	20	1	1	2	2	3	1	1	1	0	1	1	0	0	0	0	4	1	2	3.66667	2	2.4	1	0.714286	2.54545	1.72727	3.8	2.91667	4.1
1619	2	20	1	1	2	2	3	1	1	1	0	1	1	0	0	0	0	4	1	2	3.66667	2	2.4	1	0.714286	2.54545	1.72727	3.8	2.91667	4.1
1622	2	20	1	1	2	2	3	1	1	1	0	1	1	0	0	0	0	4	1	2	3.66667	2	2.4	1	0.714286	2.54545	1.72727	3.8	2.91667	4.1
1623	1	20	2	2	1	2	2	1	1	1	0	0	0	0	0	0	0	7	9	1	1	2.75	1.7	2.44444	1.74603	4.09091	3.36364	3.8	2.5	4.5
1624	1	20	2	2	1	2	2	1	1	1	0	0	0	0	0	0	0	7	9	1	1	2.75	1.7	2.44444	1.74603	4.09091	3.36364	3.8	2.5	4.5
1625	1	20	2	2	1	2	2	1	1	1	0	0	0	0	0	0	0	7	9	1	1	2.75	1.7	2.44444	1.74603	4.09091	3.36364	3.8	2.5	4.5
1626	1	20	2	2	1	2	2	1	1	1	0	0	0	0	0	0	0	7	9	1	1	2.75	1.7	2.44444	1.74603	4.09091	3.36364	3.8	2.5	4.5
1627	1	20	2	2	1	2	2	1	1	1	0	0	0	0	0	0	0	7	9	1	1	2.75	1.7	2.44444	1.74603	4.09091	3.36364	3.8	2.5	4.5
1628	1	20	2	2	1	2	2	1	1	1	0	0	0	0	0	0	0	7	9	1	1	2.75	1.7	2.44444	1.74603	4.09091	3.36364	3.8	2.5	4.5
1629	1	20	2	2	1	2	2	1	1	1	0	0	0	0	0	0	0	7	9	1	1	2.75	1.7	2.44444	1.74603	4.09091	3.36364	3.8	2.5	4.5
1631	1	20	2	2	1	2	2	1	1	1	0	0	0	0	0	0	0	7	9	1	1	2.75	1.7	2.44444	1.74603	4.09091	3.36364	3.8	2.5	4.5
1632	2	20	1	1	2	2	3	1	1	1	0	1	1	0	0	0	0	4	1	2	3.66667	2	2.4	1	0.714286	2.54545	1.72727	3.8	2.91667	4.1
1633	2	20	1	1	2	2	3	1	1	1	0	1	1	0	0	0	0	4	1	2	3.66667	2	2.4	1	0.714286	2.54545	1.72727	3.8	2.91667	4.1
1634	2	20	1	1	2	2	3	1	1	1	0	1	1	0	0	0	0	4	1	2	3.66667	2	2.4	1	0.714286	2.54545	1.72727	3.8	2.91667	4.1
1636	2	20	1	1	2	2	3	1	1	1	0	1	1	0	0	0	0	4	1	2	3.66667	2	2.4	1	0.714286	2.54545	1.72727	3.8	2.91667	4.1
1637	1	20	2	2	1	2	2	1	1	1	0	0	0	0	0	0	0	7	9	1	1	2.75	1.7	2.44444	1.74603	4.09091	3.36364	3.8	2.5	4.5
1638	1	20	2	2	1	2	2	1	1	1	0	0	0	0	0	0	0	7	9	1	1	2.75	1.7	2.44444	1.74603	4.09091	3.36364	3.8	2.5	4.5
1639	1	20	2	2	1	2	2	1	1	1	0	0	0	0	0	0	0	7	9	1	1	2.75	1.7	2.44444	1.74603	4.09091	3.36364	3.8	2.5	4.5
1641	1	20	2	2	1	2	2	1	1	1	0	0	0	0	0	0	0	7	9	1	1	2.75	1.7	2.44444	1.74603	4.09091	3.36364	3.8	2.5	4.5
1642	2	19	1	1	1	2	2	1	1	1	0	0	0	0	0	0	0	6	9	2	2	3	2.4	4.22222	3.01587	3.45455	3	3.9	2.83333	3.3
1643	2	19	1	1	1	2	2	1	1	1	0	0	0	0	0	0	0	6	9	2	2	3	2.4	4.22222	3.01587	3.45455	3	3.9	2.83333	3.3
1644	2	19	1	1	1	2	2	1	1	1	0	0	0	0	0	0	0	6	9	2	2	3	2.4	4.22222	3.01587	3.45455	3	3.9	2.83333	3.3
1646	2	19	1	1	1	2	2	1	1	1	0	0	0	0	0	0	0	6	9	2	2	3	2.4	4.22222	3.01587	3.45455	3	3.9	2.83333	3.3
1647	2	19	1	1	2	2	2	1	0	1	0	0	0	0	0	0	0	5	3	1	1	2.75	2.2	4.77778	3.4127	2.45455	3.27273	4	3.5	3.8
1648	2	19	1	1	2	2	2	1	0	1	0	0	0	0	0	0	0	5	3	1	1	2.75	2.2	4.77778	3.4127	2.45455	3.27273	4	3.5	3.8
1649	2	19	1	1	2	2	2	1	0	1	0	0	0	0	0	0	0	5	3	1	1	2.75	2.2	4.77778	3.4127	2.45455	3.27273	4	3.5	3.8
1650	2	19	1	1	2	2	2	1	0	1	0	0	0	0	0	0	0	5	3	1	1	2.75	2.2	4.77778	3.4127	2.45455	3.27273	4	3.5	3.8
1651	1	19	1	1	2	2	3	1	1	0	0	1	0	0	0	0	0	5	2	1	4.16667	3	3	4.33333	3.09524	3.36364	4	4	3.83333	3.3
1652	1	19	1	1	2	2	3	1	1	0	0	1	0	0	0	0	0	5	2	1	4.16667	3	3	4.33333	3.09524	3.36364	4	4	3.83333	3.3
1653	1	19	1	1	2	2	3	1	1	0	0	1	0	0	0	0	0	5	2	1	4.16667	3	3	4.33333	3.09524	3.36364	4	4	3.83333	3.3
1654	1	19	1	1	2	2	3	1	1	0	0	1	0	0	0	0	0	5	2	1	4.16667	3	3	4.33333	3.09524	3.36364	4	4	3.83333	3.3
1655	2	20	2	2	2	2	3	1	1	1	0	1	1	0	0	0	0	4	7	2	2	3	2	2.22222	1.5873	2.45455	1.45455	4.9	2.33333	3.5
1656	2	20	2	2	2	2	3	1	1	1	0	1	1	0	0	0	0	4	7	2	2	3	2	2.22222	1.5873	2.45455	1.45455	4.9	2.33333	3.5
1657	2	20	2	2	2	2	3	1	1	1	0	1	1	0	0	0	0	4	7	2	2	3	2	2.22222	1.5873	2.45455	1.45455	4.9	2.33333	3.5
1659	2	20	2	2	2	2	3	1	1	1	0	1	1	0	0	0	0	4	7	2	2	3	2	2.22222	1.5873	2.45455	1.45455	4.9	2.33333	3.5
1660	2	19	2	2	2	2	2	1	1	0	0	0	0	0	0	0	0	4	1	2	2	1.75	2.6	1.11111	0.793651	3	3.45455	2	4	2.6
1661	2	19	2	2	2	2	2	1	1	0	0	0	0	0	0	0	0	4	1	2	2	1.75	2.6	1.11111	0.793651	3	3.45455	2	4	2.6
1662	2	19	2	2	2	2	2	1	1	0	0	0	0	0	0	0	0	4	1	2	2	1.75	2.6	1.11111	0.793651	3	3.45455	2	4	2.6
1665	2	19	2	2	2	2	2	1	1	0	0	0	0	0	0	0	0	4	1	2	2	1.75	2.6	1.11111	0.793651	3	3.45455	2	4	2.6
1666	2	19	2	2	2	2	2	1	1	0	0	0	0	0	0	0	0	4	1	2	2	1.75	2.6	1.11111	0.793651	3	3.45455	2	4	2.6
1667	2	19	2	2	2	2	2	1	1	0	0	0	0	0	0	0	0	4	1	2	2	1.75	2.6	1.11111	0.793651	3	3.45455	2	4	2.6
1668	2	19	2	2	2	2	2	1	1	0	0	0	0	0	0	0	0	4	1	2	2	1.75	2.6	1.11111	0.793651	3	3.45455	2	4	2.6
1669	2	19	2	2	2	2	2	1	1	0	0	0	0	0	0	0	0	4	1	2	2	1.75	2.6	1.11111	0.793651	3	3.45455	2	4	2.6
1670	2	19	1	1	1	2	4	1	1	1	1	0	1	0	0	0	0	7	3	2	2.33333	2	2.3	4.55556	3.25397	2.81818	2.27273	5	4	2.9
1671	2	19	1	1	1	2	4	1	1	1	1	0	1	0	0	0	0	7	3	2	2.33333	2	2.3	4.55556	3.25397	2.81818	2.27273	5	4	2.9
1672	2	19	1	1	1	2	4	1	1	1	1	0	1	0	0	0	0	7	3	2	2.33333	2	2.3	4.55556	3.25397	2.81818	2.27273	5	4	2.9
1676	2	19	1	1	1	2	4	1	1	1	1	0	1	0	0	0	0	7	3	2	2.33333	2	2.3	4.55556	3.25397	2.81818	2.27273	5	4	2.9
1677	2	19	1	1	1	2	4	1	1	1	1	0	1	0	0	0	0	7	3	2	2.33333	2	2.3	4.55556	3.25397	2.81818	2.27273	5	4	2.9
1678	2	19	1	1	1	2	4	1	1	1	1	0	1	0	0	0	0	7	3	2	2.33333	2	2.3	4.55556	3.25397	2.81818	2.27273	5	4	2.9
1679	2	19	1	1	1	2	4	1	1	1	1	0	1	0	0	0	0	7	3	2	2.33333	2	2.3	4.55556	3.25397	2.81818	2.27273	5	4	2.9
1681	2	19	1	1	1	2	4	1	1	1	1	0	1	0	0	0	0	7	3	2	2.33333	2	2.3	4.55556	3.25397	2.81818	2.27273	5	4	2.9
1682	2	19	1	1	2	2	3	1	1	1	1	0	0	0	0	0	0	6	3	1	1	1.75	1.2	1.22222	0.873016	2	3.81818	5	2.66667	4.1
1683	2	19	1	1	2	2	3	1	1	1	1	0	0	0	0	0	0	6	3	1	1	1.75	1.2	1.22222	0.873016	2	3.81818	5	2.66667	4.1
1684	2	19	1	1	2	2	3	1	1	1	1	0	0	0	0	0	0	6	3	1	1	1.75	1.2	1.22222	0.873016	2	3.81818	5	2.66667	4.1
1686	2	19	1	1	2	2	3	1	1	1	1	0	0	0	0	0	0	6	3	1	1	1.75	1.2	1.22222	0.873016	2	3.81818	5	2.66667	4.1
1687	2	19	1	1	1	2	4	1	1	1	1	0	1	0	0	0	0	7	3	2	2.33333	2	2.3	4.55556	3.25397	2.81818	2.27273	5	4	2.9
1688	2	19	1	1	1	2	4	1	1	1	1	0	1	0	0	0	0	7	3	2	2.33333	2	2.3	4.55556	3.25397	2.81818	2.27273	5	4	2.9
1689	2	19	1	1	1	2	4	1	1	1	1	0	1	0	0	0	0	7	3	2	2.33333	2	2.3	4.55556	3.25397	2.81818	2.27273	5	4	2.9
1691	2	19	1	1	1	2	4	1	1	1	1	0	1	0	0	0	0	7	3	2	2.33333	2	2.3	4.55556	3.25397	2.81818	2.27273	5	4	2.9
1692	2	19	1	1	1	2	4	1	1	1	1	0	1	0	0	0	0	7	3	2	2.33333	2	2.3	4.55556	3.25397	2.81818	2.27273	5	4	2.9
1693	2	19	1	1	1	2	4	1	1	1	1	0	1	0	0	0	0	7	3	2	2.33333	2	2.3	4.55556	3.25397	2.81818	2.27273	5	4	2.9
1694	2	19	1	1	1	2	4	1	1	1	1	0	1	0	0	0	0	7	3	2	2.33333	2	2.3	4.55556	3.25397	2.81818	2.27273	5	4	2.9
1697	2	19	1	1	1	2	4	1	1	1	1	0	1	0	0	0	0	7	3	2	2.33333	2	2.3	4.55556	3.25397	2.81818	2.27273	5	4	2.9
1698	1	20	1	1	1	1	2	1	1	1	0	1	0	0	0	0	0	4	3	2	3.16667	3	2.8	4	2.85714	3.27273	2.63636	4	3.58333	3.6
1699	1	20	1	1	1	1	2	1	1	1	0	1	0	0	0	0	0	4	3	2	3.16667	3	2.8	4	2.85714	3.27273	2.63636	4	3.58333	3.6
1700	1	20	1	1	1	1	2	1	1	1	0	1	0	0	0	0	0	4	3	2	3.16667	3	2.8	4	2.85714	3.27273	2.63636	4	3.58333	3.6
1701	1	20	1	1	1	1	2	1	1	1	0	1	0	0	0	0	0	4	3	2	3.16667	3	2.8	4	2.85714	3.27273	2.63636	4	3.58333	3.6
1702	2	18	1	1	1	2	3	1	1	1	1	0	0	0	0	0	0	6	2	2	3.5	2.75	2.3	3.33333	2.38095	2.81818	3.63636	3.9	3	3.1
1703	2	18	1	1	1	2	3	1	1	1	1	0	0	0	0	0	0	6	2	2	3.5	2.75	2.3	3.33333	2.38095	2.81818	3.63636	3.9	3	3.1
1704	2	18	1	1	1	2	3	1	1	1	1	0	0	0	0	0	0	6	2	2	3.5	2.75	2.3	3.33333	2.38095	2.81818	3.63636	3.9	3	3.1
1706	2	18	1	1	1	2	3	1	1	1	1	0	0	0	0	0	0	6	2	2	3.5	2.75	2.3	3.33333	2.38095	2.81818	3.63636	3.9	3	3.1
1707	1	20	2	2	2	2	2	1	1	0	0	1	0	0	0	0	0	1	3	1	1	2	1.1	2.44444	1.74603	1.90909	3.63636	3	2.91667	2.8
1708	1	20	2	2	2	2	2	1	1	0	0	1	0	0	0	0	0	1	3	1	1	2	1.1	2.44444	1.74603	1.90909	3.63636	3	2.91667	2.8
1709	1	20	2	2	2	2	2	1	1	0	0	1	0	0	0	0	0	1	3	1	1	2	1.1	2.44444	1.74603	1.90909	3.63636	3	2.91667	2.8
1710	1	20	2	2	2	2	2	1	1	0	0	1	0	0	0	0	0	1	3	1	1	2	1.1	2.44444	1.74603	1.90909	3.63636	3	2.91667	2.8
1711	1	20	2	2	2	2	2	1	1	0	0	1	0	0	0	0	0	1	3	1	1	2	1.1	2.44444	1.74603	1.90909	3.63636	3	2.91667	2.8
1712	1	20	2	2	2	2	2	1	1	0	0	1	0	0	0	0	0	1	3	1	1	2	1.1	2.44444	1.74603	1.90909	3.63636	3	2.91667	2.8
1713	1	20	2	2	2	2	2	1	1	0	0	1	0	0	0	0	0	1	3	1	1	2	1.1	2.44444	1.74603	1.90909	3.63636	3	2.91667	2.8
1714	1	20	2	2	2	2	2	1	1	0	0	1	0	0	0	0	0	1	3	1	1	2	1.1	2.44444	1.74603	1.90909	3.63636	3	2.91667	2.8
1715	1	20	2	2	2	2	2	1	1	0	0	1	0	0	0	0	0	1	3	1	1	2	1.1	2.44444	1.74603	1.90909	3.63636	3	2.91667	2.8
1716	1	20	2	2	2	2	2	1	1	0	0	1	0	0	0	0	0	1	3	1	1	2	1.1	2.44444	1.74603	1.90909	3.63636	3	2.91667	2.8
1717	1	20	2	2	2	2	2	1	1	0	0	1	0	0	0	0	0	1	3	1	1	2	1.1	2.44444	1.74603	1.90909	3.63636	3	2.91667	2.8
1719	1	20	2	2	2	2	2	1	1	0	0	1	0	0	0	0	0	1	3	1	1	2	1.1	2.44444	1.74603	1.90909	3.63636	3	2.91667	2.8
1720	1	20	2	2	2	2	2	1	1	0	0	1	0	0	0	0	0	1	3	1	1	2	1.1	2.44444	1.74603	1.90909	3.63636	3	2.91667	2.8
1721	1	20	2	2	2	2	2	1	1	0	0	1	0	0	0	0	0	1	3	1	1	2	1.1	2.44444	1.74603	1.90909	3.63636	3	2.91667	2.8
1722	1	20	2	2	2	2	2	1	1	0	0	1	0	0	0	0	0	1	3	1	1	2	1.1	2.44444	1.74603	1.90909	3.63636	3	2.91667	2.8
1723	1	20	2	2	2	2	2	1	1	0	0	1	0	0	0	0	0	1	3	1	1	2	1.1	2.44444	1.74603	1.90909	3.63636	3	2.91667	2.8
1724	1	18	1	1	1	2	3	1	1	1	0	0	0	0	0	0	0	5	5	2	2.16667	3.75	2.8	4.55556	3.25397	3.36364	3.63636	4	3.66667	2.9
1725	1	18	1	1	1	2	3	1	1	1	0	0	0	0	0	0	0	5	5	2	2.16667	3.75	2.8	4.55556	3.25397	3.36364	3.63636	4	3.66667	2.9
1726	1	18	1	1	1	2	3	1	1	1	0	0	0	0	0	0	0	5	5	2	2.16667	3.75	2.8	4.55556	3.25397	3.36364	3.63636	4	3.66667	2.9
1727	1	18	1	1	1	2	3	1	1	1	0	0	0	0	0	0	0	5	5	2	2.16667	3.75	2.8	4.55556	3.25397	3.36364	3.63636	4	3.66667	2.9
1728	2	19	1	1	2	2	3	1	1	1	0	0	0	0	0	0	0	4	3	2	2.66667	2	2	4.44444	3.1746	3.27273	2.90909	4	4	3.6
1729	2	19	1	1	2	2	3	1	1	1	0	0	0	0	0	0	0	4	3	2	2.66667	2	2	4.44444	3.1746	3.27273	2.90909	4	4	3.6
1730	2	19	1	1	2	2	3	1	1	1	0	0	0	0	0	0	0	4	3	2	2.66667	2	2	4.44444	3.1746	3.27273	2.90909	4	4	3.6
1731	2	19	1	1	2	2	3	1	1	1	0	0	0	0	0	0	0	4	3	2	2.66667	2	2	4.44444	3.1746	3.27273	2.90909	4	4	3.6
1732	2	19	1	1	1	1	2	1	1	1	0	1	0	0	0	0	0	4	7	2	2.83333	3	2	2.77778	1.98413	2.27273	4.27273	4	3.08333	3.1
1733	2	19	1	1	1	1	2	1	1	1	0	1	0	0	0	0	0	4	7	2	2.83333	3	2	2.77778	1.98413	2.27273	4.27273	4	3.08333	3.1
1734	2	19	1	1	1	1	2	1	1	1	0	1	0	0	0	0	0	4	7	2	2.83333	3	2	2.77778	1.98413	2.27273	4.27273	4	3.08333	3.1
1735	2	19	1	1	1	1	2	1	1	1	0	1	0	0	0	0	0	4	7	2	2.83333	3	2	2.77778	1.98413	2.27273	4.27273	4	3.08333	3.1
1736	2	19	2	2	1	1	3	1	1	1	0	0	0	0	0	0	0	4	8	2	4	3	2.5	3.55556	2.53968	2.72727	3.09091	3.8	3.25	2.8
1737	2	19	2	2	1	1	3	1	1	1	0	0	0	0	0	0	0	4	8	2	4	3	2.5	3.55556	2.53968	2.72727	3.09091	3.8	3.25	2.8
1738	2	19	2	2	1	1	3	1	1	1	0	0	0	0	0	0	0	4	8	2	4	3	2.5	3.55556	2.53968	2.72727	3.09091	3.8	3.25	2.8
1740	2	19	2	2	1	1	3	1	1	1	0	0	0	0	0	0	0	4	8	2	4	3	2.5	3.55556	2.53968	2.72727	3.09091	3.8	3.25	2.8
1741	1	19	1	1	1	1	4	1	1	1	1	1	1	0	0	1	0	5	9	1	4	3	3	4	2.85714	3	3	3	3.66667	3.4
1742	1	19	1	1	1	1	4	1	1	1	1	1	1	0	0	1	0	5	9	1	4	3	3	4	2.85714	3	3	3	3.66667	3.4
1743	1	19	1	1	1	1	4	1	1	1	1	1	1	0	0	1	0	5	9	1	4	3	3	4	2.85714	3	3	3	3.66667	3.4
1745	1	19	1	1	1	1	4	1	1	1	1	1	1	0	0	1	0	5	9	1	4	3	3	4	2.85714	3	3	3	3.66667	3.4
1746	1	18	1	1	2	2	3	1	1	1	1	1	0	0	0	0	0	3	2	2	2	2.25	1.4	3.22222	2.30159	2	2.54545	3.4	2.16667	3.9
1747	1	18	1	1	2	2	3	1	1	1	1	1	0	0	0	0	0	3	2	2	2	2.25	1.4	3.22222	2.30159	2	2.54545	3.4	2.16667	3.9
1748	1	18	1	1	2	2	3	1	1	1	1	1	0	0	0	0	0	3	2	2	2	2.25	1.4	3.22222	2.30159	2	2.54545	3.4	2.16667	3.9
1752	1	18	1	1	2	2	3	1	1	1	1	1	0	0	0	0	0	3	2	2	2	2.25	1.4	3.22222	2.30159	2	2.54545	3.4	2.16667	3.9
1753	1	18	1	1	1	1	3	1	1	1	1	0	0	0	0	0	0	6	2	2	3.5	2	2.7	4.33333	3.09524	3.81818	3.81818	3	4.25	2.4
1754	1	18	1	1	1	1	3	1	1	1	1	0	0	0	0	0	0	6	2	2	3.5	2	2.7	4.33333	3.09524	3.81818	3.81818	3	4.25	2.4
1755	1	18	1	1	1	1	3	1	1	1	1	0	0	0	0	0	0	6	2	2	3.5	2	2.7	4.33333	3.09524	3.81818	3.81818	3	4.25	2.4
1757	1	18	1	1	1	1	3	1	1	1	1	0	0	0	0	0	0	6	2	2	3.5	2	2.7	4.33333	3.09524	3.81818	3.81818	3	4.25	2.4
1758	1	18	1	1	2	2	3	1	1	1	1	1	0	0	0	0	0	3	2	2	2	2.25	1.4	3.22222	2.30159	2	2.54545	3.4	2.16667	3.9
1759	1	18	1	1	2	2	3	1	1	1	1	1	0	0	0	0	0	3	2	2	2	2.25	1.4	3.22222	2.30159	2	2.54545	3.4	2.16667	3.9
1760	1	18	1	1	2	2	3	1	1	1	1	1	0	0	0	0	0	3	2	2	2	2.25	1.4	3.22222	2.30159	2	2.54545	3.4	2.16667	3.9
1762	1	18	1	1	2	2	3	1	1	1	1	1	0	0	0	0	0	3	2	2	2	2.25	1.4	3.22222	2.30159	2	2.54545	3.4	2.16667	3.9
1763	1	18	1	1	2	2	1	1	1	1	0	1	0	0	0	0	0	7	9	1	4.16667	3.5	2.7	4.33333	3.09524	3.72727	3.36364	3.1	3.75	2.6
1764	1	18	1	1	2	2	1	1	1	1	0	1	0	0	0	0	0	7	9	1	4.16667	3.5	2.7	4.33333	3.09524	3.72727	3.36364	3.1	3.75	2.6
1765	1	18	1	1	2	2	1	1	1	1	0	1	0	0	0	0	0	7	9	1	4.16667	3.5	2.7	4.33333	3.09524	3.72727	3.36364	3.1	3.75	2.6
1767	1	18	1	1	2	2	1	1	1	1	0	1	0	0	0	0	0	7	9	1	4.16667	3.5	2.7	4.33333	3.09524	3.72727	3.36364	3.1	3.75	2.6
1768	2	19	1	1	2	2	2	1	1	1	1	0	0	0	0	0	0	5	3	2	3.16667	3.5	2.2	4.22222	3.01587	2.45455	3.54545	3.7	3.08333	3.4
1769	2	19	1	1	2	2	2	1	1	1	1	0	0	0	0	0	0	5	3	2	3.16667	3.5	2.2	4.22222	3.01587	2.45455	3.54545	3.7	3.08333	3.4
1770	2	19	1	1	2	2	2	1	1	1	1	0	0	0	0	0	0	5	3	2	3.16667	3.5	2.2	4.22222	3.01587	2.45455	3.54545	3.7	3.08333	3.4
1772	2	19	1	1	2	2	2	1	1	1	1	0	0	0	0	0	0	5	3	2	3.16667	3.5	2.2	4.22222	3.01587	2.45455	3.54545	3.7	3.08333	3.4
1773	2	19	1	1	2	2	2	1	1	1	1	0	0	0	0	0	0	5	3	2	3.16667	3.5	2.2	4.22222	3.01587	2.45455	3.54545	3.7	3.08333	3.4
1774	2	19	1	1	2	2	2	1	1	1	1	0	0	0	0	0	0	5	3	2	3.16667	3.5	2.2	4.22222	3.01587	2.45455	3.54545	3.7	3.08333	3.4
1775	2	19	1	1	2	2	2	1	1	1	1	0	0	0	0	0	0	5	3	2	3.16667	3.5	2.2	4.22222	3.01587	2.45455	3.54545	3.7	3.08333	3.4
1777	2	19	1	1	2	2	2	1	1	1	1	0	0	0	0	0	0	5	3	2	3.16667	3.5	2.2	4.22222	3.01587	2.45455	3.54545	3.7	3.08333	3.4
1778	2	18	2	1	2	2	2	1	1	1	0	1	0	0	0	0	0	2	2	1	1.33333	2	1.9	3.66667	2.61905	2.72727	1.54545	3.9	2.66667	4
1779	2	18	2	1	2	2	2	1	1	1	0	1	0	0	0	0	0	2	2	1	1.33333	2	1.9	3.66667	2.61905	2.72727	1.54545	3.9	2.66667	4
1780	2	18	2	1	2	2	2	1	1	1	0	1	0	0	0	0	0	2	2	1	1.33333	2	1.9	3.66667	2.61905	2.72727	1.54545	3.9	2.66667	4
1782	2	18	2	1	2	2	2	1	1	1	0	1	0	0	0	0	0	2	2	1	1.33333	2	1.9	3.66667	2.61905	2.72727	1.54545	3.9	2.66667	4
1783	2	19	1	1	1	2	2	1	1	0	0	0	0	0	0	0	1	6	1	2	1	3.25	2.4	3.77778	2.69841	3.18182	2.45455	3.7	3	4.6
1784	2	19	1	1	1	2	2	1	1	0	0	0	0	0	0	0	1	6	1	2	1	3.25	2.4	3.77778	2.69841	3.18182	2.45455	3.7	3	4.6
1785	2	19	1	1	1	2	2	1	1	0	0	0	0	0	0	0	1	6	1	2	1	3.25	2.4	3.77778	2.69841	3.18182	2.45455	3.7	3	4.6
1789	2	19	1	1	1	2	2	1	1	0	0	0	0	0	0	0	1	6	1	2	1	3.25	2.4	3.77778	2.69841	3.18182	2.45455	3.7	3	4.6
1790	2	19	1	1	1	2	2	1	1	0	0	0	0	0	0	0	1	6	1	2	1	3.25	2.4	3.77778	2.69841	3.18182	2.45455	3.7	3	4.6
1791	2	19	1	1	1	2	2	1	1	0	0	0	0	0	0	0	1	6	1	2	1	3.25	2.4	3.77778	2.69841	3.18182	2.45455	3.7	3	4.6
1792	2	19	1	1	1	2	2	1	1	0	0	0	0	0	0	0	1	6	1	2	1	3.25	2.4	3.77778	2.69841	3.18182	2.45455	3.7	3	4.6
1793	2	19	1	1	1	2	2	1	1	0	0	0	0	0	0	0	1	6	1	2	1	3.25	2.4	3.77778	2.69841	3.18182	2.45455	3.7	3	4.6
1794	1	19	1	1	1	2	2	0	1	0	0	1	0	0	0	0	0	7	1	1	1.5	1.75	2.8	1.55556	1.11111	3.81818	3.81818	4.1	4.25	2.4
1795	1	19	1	1	1	2	2	0	1	0	0	1	0	0	0	0	0	7	1	1	1.5	1.75	2.8	1.55556	1.11111	3.81818	3.81818	4.1	4.25	2.4
1796	1	19	1	1	1	2	2	0	1	0	0	1	0	0	0	0	0	7	1	1	1.5	1.75	2.8	1.55556	1.11111	3.81818	3.81818	4.1	4.25	2.4
1797	1	19	1	1	1	2	2	0	1	0	0	1	0	0	0	0	0	7	1	1	1.5	1.75	2.8	1.55556	1.11111	3.81818	3.81818	4.1	4.25	2.4
1798	1	19	1	1	1	2	2	0	1	0	0	1	0	0	0	0	0	7	1	1	1.5	1.75	2.8	1.55556	1.11111	3.81818	3.81818	4.1	4.25	2.4
1799	1	19	1	1	1	2	2	0	1	0	0	1	0	0	0	0	0	7	1	1	1.5	1.75	2.8	1.55556	1.11111	3.81818	3.81818	4.1	4.25	2.4
1800	1	19	1	1	1	2	2	0	1	0	0	1	0	0	0	0	0	7	1	1	1.5	1.75	2.8	1.55556	1.11111	3.81818	3.81818	4.1	4.25	2.4
1802	1	19	1	1	1	2	2	0	1	0	0	1	0	0	0	0	0	7	1	1	1.5	1.75	2.8	1.55556	1.11111	3.81818	3.81818	4.1	4.25	2.4
1803	2	18	1	1	1	2	4	1	1	1	1	1	1	0	0	0	0	7	4	2	2	5	2.2	4.77778	3.4127	2.72727	3.36364	5	3.41667	3.9
1804	2	18	1	1	1	2	4	1	1	1	1	1	1	0	0	0	0	7	4	2	2	5	2.2	4.77778	3.4127	2.72727	3.36364	5	3.41667	3.9
1805	2	18	1	1	1	2	4	1	1	1	1	1	1	0	0	0	0	7	4	2	2	5	2.2	4.77778	3.4127	2.72727	3.36364	5	3.41667	3.9
1807	2	18	1	1	1	2	4	1	1	1	1	1	1	0	0	0	0	7	4	2	2	5	2.2	4.77778	3.4127	2.72727	3.36364	5	3.41667	3.9
1808	2	19	1	1	2	2	4	1	1	1	0	0	0	0	0	0	0	5	8	2	3	2.75	2.1	3.44444	2.46032	2.90909	2.45455	3.1	2.58333	3.5
1809	2	19	1	1	2	2	4	1	1	1	0	0	0	0	0	0	0	5	8	2	3	2.75	2.1	3.44444	2.46032	2.90909	2.45455	3.1	2.58333	3.5
1810	2	19	1	1	2	2	4	1	1	1	0	0	0	0	0	0	0	5	8	2	3	2.75	2.1	3.44444	2.46032	2.90909	2.45455	3.1	2.58333	3.5
1812	2	19	1	1	2	2	4	1	1	1	0	0	0	0	0	0	0	5	8	2	3	2.75	2.1	3.44444	2.46032	2.90909	2.45455	3.1	2.58333	3.5
1813	2	19	1	1	2	2	4	1	1	1	0	0	0	0	0	0	0	5	8	2	3	2.75	2.1	3.44444	2.46032	2.90909	2.45455	3.1	2.58333	3.5
1814	2	19	1	1	2	2	4	1	1	1	0	0	0	0	0	0	0	5	8	2	3	2.75	2.1	3.44444	2.46032	2.90909	2.45455	3.1	2.58333	3.5
1815	2	19	1	1	2	2	4	1	1	1	0	0	0	0	0	0	0	5	8	2	3	2.75	2.1	3.44444	2.46032	2.90909	2.45455	3.1	2.58333	3.5
1818	2	19	1	1	2	2	4	1	1	1	0	0	0	0	0	0	0	5	8	2	3	2.75	2.1	3.44444	2.46032	2.90909	2.45455	3.1	2.58333	3.5
1819	2	20	2	2	1	2	3	1	1	1	0	1	0	1	0	0	0	2	2	2	4.16667	3	3	4	2.85714	3	3	3	3	3
1820	2	20	2	2	1	2	3	1	1	1	0	1	0	1	0	0	0	2	2	2	4.16667	3	3	4	2.85714	3	3	3	3	3
1821	2	20	2	2	1	2	3	1	1	1	0	1	0	1	0	0	0	2	2	2	4.16667	3	3	4	2.85714	3	3	3	3	3
1822	2	20	2	2	1	2	3	1	1	1	0	1	0	1	0	0	0	2	2	2	4.16667	3	3	4	2.85714	3	3	3	3	3
1823	2	20	1	1	2	1	2	1	1	1	1	1	1	0	0	0	0	7	9	1	1.66667	2.75	2.7	4	2.85714	2.90909	2.72727	4	2	3.6
1824	2	20	1	1	2	1	2	1	1	1	1	1	1	0	0	0	0	7	9	1	1.66667	2.75	2.7	4	2.85714	2.90909	2.72727	4	2	3.6
1825	2	20	1	1	2	1	2	1	1	1	1	1	1	0	0	0	0	7	9	1	1.66667	2.75	2.7	4	2.85714	2.90909	2.72727	4	2	3.6
1828	2	20	1	1	2	1	2	1	1	1	1	1	1	0	0	0	0	7	9	1	1.66667	2.75	2.7	4	2.85714	2.90909	2.72727	4	2	3.6
1829	2	20	1	1	2	1	2	1	1	1	1	1	1	0	0	0	0	7	9	1	1.66667	2.75	2.7	4	2.85714	2.90909	2.72727	4	2	3.6
1830	2	20	1	1	2	1	2	1	1	1	1	1	1	0	0	0	0	7	9	1	1.66667	2.75	2.7	4	2.85714	2.90909	2.72727	4	2	3.6
1831	2	20	1	1	2	1	2	1	1	1	1	1	1	0	0	0	0	7	9	1	1.66667	2.75	2.7	4	2.85714	2.90909	2.72727	4	2	3.6
1832	2	20	1	1	2	1	2	1	1	1	1	1	1	0	0	0	0	7	9	1	1.66667	2.75	2.7	4	2.85714	2.90909	2.72727	4	2	3.6
1833	1	19	1	1	2	2	2	1	1	1	0	0	0	0	0	0	0	6	2	1	4	3	2.5	4	2.85714	3.27273	3.36364	4	3.41667	3.3
1834	1	19	1	1	2	2	2	1	1	1	0	0	0	0	0	0	0	6	2	1	4	3	2.5	4	2.85714	3.27273	3.36364	4	3.41667	3.3
1835	1	19	1	1	2	2	2	1	1	1	0	0	0	0	0	0	0	6	2	1	4	3	2.5	4	2.85714	3.27273	3.36364	4	3.41667	3.3
1836	1	19	1	1	2	2	2	1	1	1	0	0	0	0	0	0	0	6	2	1	4	3	2.5	4	2.85714	3.27273	3.36364	4	3.41667	3.3
1837	2	20	1	1	1	1	3	1	1	1	0	1	1	0	0	0	1	7	6	1	2	3.25	2.7	4.44444	3.1746	3	3.54545	4	3.75	2.6
1838	2	20	1	1	1	1	3	1	1	1	0	1	1	0	0	0	1	7	6	1	2	3.25	2.7	4.44444	3.1746	3	3.54545	4	3.75	2.6
1839	2	20	1	1	1	1	3	1	1	1	0	1	1	0	0	0	1	7	6	1	2	3.25	2.7	4.44444	3.1746	3	3.54545	4	3.75	2.6
1840	2	20	1	1	1	1	3	1	1	1	0	1	1	0	0	0	1	7	6	1	2	3.25	2.7	4.44444	3.1746	3	3.54545	4	3.75	2.6
1841	2	18	2	1	2	2	2	1	0	1	0	0	0	0	0	0	0	2	4	2	4.16667	2.5	2.4	4	2.85714	3.18182	3.36364	3.6	3.5	3
1842	2	18	2	1	2	2	2	1	0	1	0	0	0	0	0	0	0	2	4	2	4.16667	2.5	2.4	4	2.85714	3.18182	3.36364	3.6	3.5	3
1843	2	18	2	1	2	2	2	1	0	1	0	0	0	0	0	0	0	2	4	2	4.16667	2.5	2.4	4	2.85714	3.18182	3.36364	3.6	3.5	3
1846	2	18	2	1	2	2	2	1	0	1	0	0	0	0	0	0	0	2	4	2	4.16667	2.5	2.4	4	2.85714	3.18182	3.36364	3.6	3.5	3
1847	2	20	2	1	2	2	2	1	1	1	0	1	0	0	0	0	1	4	5	1	1	3	2.3	3.66667	2.61905	3.45455	3.09091	3.9	2.33333	3
1848	2	20	2	1	2	2	2	1	1	1	0	1	0	0	0	0	1	4	5	1	1	3	2.3	3.66667	2.61905	3.45455	3.09091	3.9	2.33333	3
1849	2	20	2	1	2	2	2	1	1	1	0	1	0	0	0	0	1	4	5	1	1	3	2.3	3.66667	2.61905	3.45455	3.09091	3.9	2.33333	3
1850	2	20	2	1	2	2	2	1	1	1	0	1	0	0	0	0	1	4	5	1	1	3	2.3	3.66667	2.61905	3.45455	3.09091	3.9	2.33333	3
1851	2	19	1	1	1	2	3	1	1	1	1	1	1	0	0	0	0	7	9	1	2.66667	3	2.4	3.66667	2.61905	3.09091	3.18182	4.9	3.58333	3.2
1852	2	19	1	1	1	2	3	1	1	1	1	1	1	0	0	0	0	7	9	1	2.66667	3	2.4	3.66667	2.61905	3.09091	3.18182	4.9	3.58333	3.2
1853	2	19	1	1	1	2	3	1	1	1	1	1	1	0	0	0	0	7	9	1	2.66667	3	2.4	3.66667	2.61905	3.09091	3.18182	4.9	3.58333	3.2
1854	2	19	1	1	1	2	3	1	1	1	1	1	1	0	0	0	0	7	9	1	2.66667	3	2.4	3.66667	2.61905	3.09091	3.18182	4.9	3.58333	3.2
1855	2	19	1	1	2	2	3	1	1	1	1	0	0	0	0	0	0	4	1	2	5	2.25	2.5	3	2.14286	3.54545	2.63636	4.6	2.33333	3.8
1856	2	19	1	1	2	2	3	1	1	1	1	0	0	0	0	0	0	4	1	2	5	2.25	2.5	3	2.14286	3.54545	2.63636	4.6	2.33333	3.8
1857	2	19	1	1	2	2	3	1	1	1	1	0	0	0	0	0	0	4	1	2	5	2.25	2.5	3	2.14286	3.54545	2.63636	4.6	2.33333	3.8
1858	2	19	1	1	2	2	3	1	1	1	1	0	0	0	0	0	0	4	1	2	5	2.25	2.5	3	2.14286	3.54545	2.63636	4.6	2.33333	3.8
1859	2	19	1	1	2	2	2	1	1	1	0	0	0	0	0	1	1	6	2	2	3.66667	2.75	2.6	4.11111	2.93651	3.27273	3.81818	3.2	3.5	2.6
1860	2	19	1	1	2	2	2	1	1	1	0	0	0	0	0	1	1	6	2	2	3.66667	2.75	2.6	4.11111	2.93651	3.27273	3.81818	3.2	3.5	2.6
1861	2	19	1	1	2	2	2	1	1	1	0	0	0	0	0	1	1	6	2	2	3.66667	2.75	2.6	4.11111	2.93651	3.27273	3.81818	3.2	3.5	2.6
1862	2	19	1	1	2	2	2	1	1	1	0	0	0	0	0	1	1	6	2	2	3.66667	2.75	2.6	4.11111	2.93651	3.27273	3.81818	3.2	3.5	2.6
1863	2	19	1	1	2	2	2	1	1	1	0	0	0	0	0	1	1	6	2	2	3.66667	2.75	2.6	4.11111	2.93651	3.27273	3.81818	3.2	3.5	2.6
1864	2	19	1	1	2	2	2	1	1	1	0	0	0	0	0	1	1	6	2	2	3.66667	2.75	2.6	4.11111	2.93651	3.27273	3.81818	3.2	3.5	2.6
1865	2	19	1	1	2	2	2	1	1	1	0	0	0	0	0	1	1	6	2	2	3.66667	2.75	2.6	4.11111	2.93651	3.27273	3.81818	3.2	3.5	2.6
1866	2	19	1	1	2	2	2	1	1	1	0	0	0	0	0	1	1	6	2	2	3.66667	2.75	2.6	4.11111	2.93651	3.27273	3.81818	3.2	3.5	2.6
1867	2	19	1	1	1	2	4	1	1	1	1	0	0	0	0	1	0	7	1	2	3.5	2.75	2.3	2.22222	1.5873	1.72727	1.72727	1.8	1.16667	3.9
1868	2	19	1	1	1	2	4	1	1	1	1	0	0	0	0	1	0	7	1	2	3.5	2.75	2.3	2.22222	1.5873	1.72727	1.72727	1.8	1.16667	3.9
1869	2	19	1	1	1	2	4	1	1	1	1	0	0	0	0	1	0	7	1	2	3.5	2.75	2.3	2.22222	1.5873	1.72727	1.72727	1.8	1.16667	3.9
1871	2	19	1	1	1	2	4	1	1	1	1	0	0	0	0	1	0	7	1	2	3.5	2.75	2.3	2.22222	1.5873	1.72727	1.72727	1.8	1.16667	3.9
1872	1	19	1	1	1	2	2	1	0	1	0	0	0	0	0	0	0	6	5	2	1.5	3.25	1.8	3.66667	2.61905	2.54545	2.45455	3.8	2.16667	2.9
1873	1	19	1	1	1	2	2	1	0	1	0	0	0	0	0	0	0	6	5	2	1.5	3.25	1.8	3.66667	2.61905	2.54545	2.45455	3.8	2.16667	2.9
1874	1	19	1	1	1	2	2	1	0	1	0	0	0	0	0	0	0	6	5	2	1.5	3.25	1.8	3.66667	2.61905	2.54545	2.45455	3.8	2.16667	2.9
1876	1	19	1	1	1	2	2	1	0	1	0	0	0	0	0	0	0	6	5	2	1.5	3.25	1.8	3.66667	2.61905	2.54545	2.45455	3.8	2.16667	2.9
1877	1	19	1	1	1	2	2	1	0	1	0	0	0	0	0	0	0	6	5	2	1.5	3.25	1.8	3.66667	2.61905	2.54545	2.45455	3.8	2.16667	2.9
1878	1	19	1	1	1	2	2	1	0	1	0	0	0	0	0	0	0	6	5	2	1.5	3.25	1.8	3.66667	2.61905	2.54545	2.45455	3.8	2.16667	2.9
1879	1	19	1	1	1	2	2	1	0	1	0	0	0	0	0	0	0	6	5	2	1.5	3.25	1.8	3.66667	2.61905	2.54545	2.45455	3.8	2.16667	2.9
1880	1	19	1	1	1	2	2	1	0	1	0	0	0	0	0	0	0	6	5	2	1.5	3.25	1.8	3.66667	2.61905	2.54545	2.45455	3.8	2.16667	2.9
1881	2	20	2	2	2	2	2	1	0	1	0	1	0	0	0	0	0	6	7	1	3.5	3	3.3	4.22222	3.01587	4	3.81818	3.6	3.08333	3.4
1882	2	20	2	2	2	2	2	1	0	1	0	1	0	0	0	0	0	6	7	1	3.5	3	3.3	4.22222	3.01587	4	3.81818	3.6	3.08333	3.4
1883	2	20	2	2	2	2	2	1	0	1	0	1	0	0	0	0	0	6	7	1	3.5	3	3.3	4.22222	3.01587	4	3.81818	3.6	3.08333	3.4
1884	2	20	2	2	2	2	2	1	0	1	0	1	0	0	0	0	0	6	7	1	3.5	3	3.3	4.22222	3.01587	4	3.81818	3.6	3.08333	3.4
1885	2	19	2	1	2	2	3	1	1	1	0	0	0	0	0	0	0	7	7	2	3	3.5	3	5.44444	3.88889	3.18182	3.72727	4.4	2.5	2.4
1886	2	19	2	1	2	2	3	1	1	1	0	0	0	0	0	0	0	7	7	2	3	3.5	3	5.44444	3.88889	3.18182	3.72727	4.4	2.5	2.4
1887	2	19	2	1	2	2	3	1	1	1	0	0	0	0	0	0	0	7	7	2	3	3.5	3	5.44444	3.88889	3.18182	3.72727	4.4	2.5	2.4
1888	2	19	2	1	2	2	3	1	1	1	0	0	0	0	0	0	0	7	7	2	3	3.5	3	5.44444	3.88889	3.18182	3.72727	4.4	2.5	2.4
1889	1	20	1	1	1	2	4	1	1	1	0	0	1	0	0	1	0	3	5	2	2.16667	4.25	1.9	2.11111	1.50794	1.90909	3	3.8	4.5	3.9
1890	1	20	1	1	1	2	4	1	1	1	0	0	1	0	0	1	0	3	5	2	2.16667	4.25	1.9	2.11111	1.50794	1.90909	3	3.8	4.5	3.9
1891	1	20	1	1	1	2	4	1	1	1	0	0	1	0	0	1	0	3	5	2	2.16667	4.25	1.9	2.11111	1.50794	1.90909	3	3.8	4.5	3.9
1892	1	20	1	1	1	2	4	1	1	1	0	0	1	0	0	1	0	3	5	2	2.16667	4.25	1.9	2.11111	1.50794	1.90909	3	3.8	4.5	3.9
1893	1	20	1	1	1	2	4	1	1	1	0	0	1	0	0	1	0	3	5	2	2.16667	4.25	1.9	2.11111	1.50794	1.90909	3	3.8	4.5	3.9
1894	1	20	1	1	1	2	4	1	1	1	0	0	1	0	0	1	0	3	5	2	2.16667	4.25	1.9	2.11111	1.50794	1.90909	3	3.8	4.5	3.9
1895	1	20	1	1	1	2	4	1	1	1	0	0	1	0	0	1	0	3	5	2	2.16667	4.25	1.9	2.11111	1.50794	1.90909	3	3.8	4.5	3.9
1898	1	20	1	1	1	2	4	1	1	1	0	0	1	0	0	1	0	3	5	2	2.16667	4.25	1.9	2.11111	1.50794	1.90909	3	3.8	4.5	3.9
1899	1	20	1	1	2	2	3	1	1	1	1	0	0	0	0	0	0	6	2	2	2.83333	2.25	2	4.55556	3.25397	3.18182	3.27273	3.8	2.58333	4
1900	1	20	1	1	2	2	3	1	1	1	1	0	0	0	0	0	0	6	2	2	2.83333	2.25	2	4.55556	3.25397	3.18182	3.27273	3.8	2.58333	4
1901	1	20	1	1	2	2	3	1	1	1	1	0	0	0	0	0	0	6	2	2	2.83333	2.25	2	4.55556	3.25397	3.18182	3.27273	3.8	2.58333	4
1910	1	20	1	1	2	2	3	1	1	1	1	0	0	0	0	0	0	6	2	2	2.83333	2.25	2	4.55556	3.25397	3.18182	3.27273	3.8	2.58333	4
1911	1	20	1	1	2	2	3	1	1	1	1	0	0	0	0	0	0	6	2	2	2.83333	2.25	2	4.55556	3.25397	3.18182	3.27273	3.8	2.58333	4
1912	1	20	1	1	2	2	3	1	1	1	1	0	0	0	0	0	0	6	2	2	2.83333	2.25	2	4.55556	3.25397	3.18182	3.27273	3.8	2.58333	4
1913	1	20	1	1	2	2	3	1	1	1	1	0	0	0	0	0	0	6	2	2	2.83333	2.25	2	4.55556	3.25397	3.18182	3.27273	3.8	2.58333	4
1918	1	20	1	1	2	2	3	1	1	1	1	0	0	0	0	0	0	6	2	2	2.83333	2.25	2	4.55556	3.25397	3.18182	3.27273	3.8	2.58333	4
1919	2	20	2	2	2	2	2	1	1	1	0	0	0	0	0	1	0	3	1	1	2.5	2	2.9	4.11111	2.93651	3.27273	2.81818	3.3	3	2.8
1920	2	20	2	2	2	2	2	1	1	1	0	0	0	0	0	1	0	3	1	1	2.5	2	2.9	4.11111	2.93651	3.27273	2.81818	3.3	3	2.8
1921	2	20	2	2	2	2	2	1	1	1	0	0	0	0	0	1	0	3	1	1	2.5	2	2.9	4.11111	2.93651	3.27273	2.81818	3.3	3	2.8
1922	2	20	2	2	2	2	2	1	1	1	0	0	0	0	0	1	0	3	1	1	2.5	2	2.9	4.11111	2.93651	3.27273	2.81818	3.3	3	2.8
1923	2	19	1	1	1	2	4	1	1	0	0	1	0	0	0	0	0	7	5	2	1	3.75	2.5	3	2.14286	2.36364	3.18182	4.8	1.66667	3.8
1924	2	19	1	1	1	2	4	1	1	0	0	1	0	0	0	0	0	7	5	2	1	3.75	2.5	3	2.14286	2.36364	3.18182	4.8	1.66667	3.8
1925	2	19	1	1	1	2	4	1	1	0	0	1	0	0	0	0	0	7	5	2	1	3.75	2.5	3	2.14286	2.36364	3.18182	4.8	1.66667	3.8
1929	2	19	1	1	1	2	4	1	1	0	0	1	0	0	0	0	0	7	5	2	1	3.75	2.5	3	2.14286	2.36364	3.18182	4.8	1.66667	3.8
1930	2	19	1	1	1	2	4	1	1	0	0	1	0	0	0	0	0	7	5	2	1	3.75	2.5	3	2.14286	2.36364	3.18182	4.8	1.66667	3.8
1931	2	19	1	1	1	2	4	1	1	0	0	1	0	0	0	0	0	7	5	2	1	3.75	2.5	3	2.14286	2.36364	3.18182	4.8	1.66667	3.8
1932	2	19	1	1	1	2	4	1	1	0	0	1	0	0	0	0	0	7	5	2	1	3.75	2.5	3	2.14286	2.36364	3.18182	4.8	1.66667	3.8
1933	2	19	1	1	1	2	4	1	1	0	0	1	0	0	0	0	0	7	5	2	1	3.75	2.5	3	2.14286	2.36364	3.18182	4.8	1.66667	3.8
1934	2	19	1	1	2	2	2	1	1	1	1	0	0	0	0	0	0	7	3	2	3	3.5	2.8	3.77778	2.69841	3.09091	3.81818	4	3.58333	3.1
1935	2	19	1	1	2	2	2	1	1	1	1	0	0	0	0	0	0	7	3	2	3	3.5	2.8	3.77778	2.69841	3.09091	3.81818	4	3.58333	3.1
1936	2	19	1	1	2	2	2	1	1	1	1	0	0	0	0	0	0	7	3	2	3	3.5	2.8	3.77778	2.69841	3.09091	3.81818	4	3.58333	3.1
1939	2	19	1	1	2	2	2	1	1	1	1	0	0	0	0	0	0	7	3	2	3	3.5	2.8	3.77778	2.69841	3.09091	3.81818	4	3.58333	3.1
1940	2	20	2	2	2	2	2	1	1	1	0	0	0	0	0	0	0	5	1	1	1	3.5	2.8	5.55556	3.96825	3.45455	2.45455	2.3	4	3.9
1941	2	20	2	2	2	2	2	1	1	1	0	0	0	0	0	0	0	5	1	1	1	3.5	2.8	5.55556	3.96825	3.45455	2.45455	2.3	4	3.9
1942	2	20	2	2	2	2	2	1	1	1	0	0	0	0	0	0	0	5	1	1	1	3.5	2.8	5.55556	3.96825	3.45455	2.45455	2.3	4	3.9
1944	2	20	2	2	2	2	2	1	1	1	0	0	0	0	0	0	0	5	1	1	1	3.5	2.8	5.55556	3.96825	3.45455	2.45455	2.3	4	3.9
1945	2	20	2	2	2	2	2	1	1	1	0	0	0	0	0	0	0	5	1	1	1	3.5	2.8	5.55556	3.96825	3.45455	2.45455	2.3	4	3.9
1946	2	20	2	2	2	2	2	1	1	1	0	0	0	0	0	0	0	5	1	1	1	3.5	2.8	5.55556	3.96825	3.45455	2.45455	2.3	4	3.9
1947	2	20	2	2	2	2	2	1	1	1	0	0	0	0	0	0	0	5	1	1	1	3.5	2.8	5.55556	3.96825	3.45455	2.45455	2.3	4	3.9
1948	2	20	2	2	2	2	2	1	1	1	0	0	0	0	0	0	0	5	1	1	1	3.5	2.8	5.55556	3.96825	3.45455	2.45455	2.3	4	3.9
1949	1	19	1	1	1	1	3	1	1	1	0	0	0	0	0	0	0	4	3	1	2.16667	1.75	1.5	1.44444	1.03175	2.27273	2.45455	3.5	2.5	3.8
1950	1	19	1	1	1	1	3	1	1	1	0	0	0	0	0	0	0	4	3	1	2.16667	1.75	1.5	1.44444	1.03175	2.27273	2.45455	3.5	2.5	3.8
1951	1	19	1	1	1	1	3	1	1	1	0	0	0	0	0	0	0	4	3	1	2.16667	1.75	1.5	1.44444	1.03175	2.27273	2.45455	3.5	2.5	3.8
1954	1	19	1	1	1	1	3	1	1	1	0	0	0	0	0	0	0	4	3	1	2.16667	1.75	1.5	1.44444	1.03175	2.27273	2.45455	3.5	2.5	3.8
1955	1	19	1	1	1	1	3	1	1	1	0	0	0	0	0	0	0	4	3	1	2.16667	1.75	1.5	1.44444	1.03175	2.27273	2.45455	3.5	2.5	3.8
1956	1	19	1	1	1	1	3	1	1	1	0	0	0	0	0	0	0	4	3	1	2.16667	1.75	1.5	1.44444	1.03175	2.27273	2.45455	3.5	2.5	3.8
1957	1	19	1	1	1	1	3	1	1	1	0	0	0	0	0	0	0	4	3	1	2.16667	1.75	1.5	1.44444	1.03175	2.27273	2.45455	3.5	2.5	3.8
1960	1	19	1	1	1	1	3	1	1	1	0	0	0	0	0	0	0	4	3	1	2.16667	1.75	1.5	1.44444	1.03175	2.27273	2.45455	3.5	2.5	3.8
1961	1	20	1	1	1	1	4	1	1	1	0	0	0	0	0	0	0	2	7	1	5.33333	3.5	3.8	5.22222	3.73016	3.36364	3.18182	3.6	1.66667	3.2
1962	1	20	1	1	1	1	4	1	1	1	0	0	0	0	0	0	0	2	7	1	5.33333	3.5	3.8	5.22222	3.73016	3.36364	3.18182	3.6	1.66667	3.2
1963	1	20	1	1	1	1	4	1	1	1	0	0	0	0	0	0	0	2	7	1	5.33333	3.5	3.8	5.22222	3.73016	3.36364	3.18182	3.6	1.66667	3.2
1964	1	20	1	1	1	1	4	1	1	1	0	0	0	0	0	0	0	2	7	1	5.33333	3.5	3.8	5.22222	3.73016	3.36364	3.18182	3.6	1.66667	3.2
1965	2	20	2	2	2	2	3	1	1	1	0	0	0	0	0	0	0	4	5	1	4.16667	3	3	4.55556	3.25397	3.72727	3.81818	4	3.58333	3
1966	2	20	2	2	2	2	3	1	1	1	0	0	0	0	0	0	0	4	5	1	4.16667	3	3	4.55556	3.25397	3.72727	3.81818	4	3.58333	3
1967	2	20	2	2	2	2	3	1	1	1	0	0	0	0	0	0	0	4	5	1	4.16667	3	3	4.55556	3.25397	3.72727	3.81818	4	3.58333	3
1968	2	20	2	2	2	2	3	1	1	1	0	0	0	0	0	0	0	4	5	1	4.16667	3	3	4.55556	3.25397	3.72727	3.81818	4	3.58333	3
1969	2	19	2	1	1	2	2	1	0	0	0	1	0	0	0	0	0	7	1	2	2.66667	5	2.7	5	3.57143	3.63636	3.81818	4	3.16667	2.9
1970	2	19	2	1	1	2	2	1	0	0	0	1	0	0	0	0	0	7	1	2	2.66667	5	2.7	5	3.57143	3.63636	3.81818	4	3.16667	2.9
1971	2	19	2	1	1	2	2	1	0	0	0	1	0	0	0	0	0	7	1	2	2.66667	5	2.7	5	3.57143	3.63636	3.81818	4	3.16667	2.9
1975	2	19	2	1	1	2	2	1	0	0	0	1	0	0	0	0	0	7	1	2	2.66667	5	2.7	5	3.57143	3.63636	3.81818	4	3.16667	2.9
1976	1	20	1	1	1	2	2	1	1	0	0	1	0	1	1	1	0	6	4	1	3.33333	4	3.1	4.66667	3.33333	3.63636	3.63636	3.7	3.58333	2.7
1977	1	20	1	1	1	2	2	1	1	0	0	1	0	1	1	1	0	6	4	1	3.33333	4	3.1	4.66667	3.33333	3.63636	3.63636	3.7	3.58333	2.7
1978	1	20	1	1	1	2	2	1	1	0	0	1	0	1	1	1	0	6	4	1	3.33333	4	3.1	4.66667	3.33333	3.63636	3.63636	3.7	3.58333	2.7
1979	1	20	1	1	1	2	2	1	1	0	0	1	0	1	1	1	0	6	4	1	3.33333	4	3.1	4.66667	3.33333	3.63636	3.63636	3.7	3.58333	2.7
1980	1	19	2	1	1	1	4	1	1	1	0	1	0	1	1	1	0	3	9	1	2.5	3.5	2.9	3.55556	2.53968	4.27273	4.09091	4	4.75	2
1981	1	19	2	1	1	1	4	1	1	1	0	1	0	1	1	1	0	3	9	1	2.5	3.5	2.9	3.55556	2.53968	4.27273	4.09091	4	4.75	2
1982	1	19	2	1	1	1	4	1	1	1	0	1	0	1	1	1	0	3	9	1	2.5	3.5	2.9	3.55556	2.53968	4.27273	4.09091	4	4.75	2
1983	1	19	2	1	1	1	4	1	1	1	0	1	0	1	1	1	0	3	9	1	2.5	3.5	2.9	3.55556	2.53968	4.27273	4.09091	4	4.75	2
1984	1	18	1	1	1	2	2	1	1	1	0	0	0	0	0	1	0	6	1	2	4	2	2.2	1.55556	1.11111	2.63636	3	3.5	3.16667	2.5
1985	1	18	1	1	1	2	2	1	1	1	0	0	0	0	0	1	0	6	1	2	4	2	2.2	1.55556	1.11111	2.63636	3	3.5	3.16667	2.5
1986	1	18	1	1	1	2	2	1	1	1	0	0	0	0	0	1	0	6	1	2	4	2	2.2	1.55556	1.11111	2.63636	3	3.5	3.16667	2.5
1987	1	18	1	1	1	2	2	1	1	1	0	0	0	0	0	1	0	6	1	2	4	2	2.2	1.55556	1.11111	2.63636	3	3.5	3.16667	2.5
1988	2	21	2	2	1	2	3	1	1	1	0	0	0	0	0	0	1	6	5	2	2.5	3.75	2.6	2.11111	1.50794	2.90909	3.72727	4.5	1.83333	4.9
1989	2	21	2	2	1	2	3	1	1	1	0	0	0	0	0	0	1	6	5	2	2.5	3.75	2.6	2.11111	1.50794	2.90909	3.72727	4.5	1.83333	4.9
1990	2	21	2	2	1	2	3	1	1	1	0	0	0	0	0	0	1	6	5	2	2.5	3.75	2.6	2.11111	1.50794	2.90909	3.72727	4.5	1.83333	4.9
1992	2	21	2	2	1	2	3	1	1	1	0	0	0	0	0	0	1	6	5	2	2.5	3.75	2.6	2.11111	1.50794	2.90909	3.72727	4.5	1.83333	4.9
1993	2	18	2	1	1	2	2	1	1	1	0	0	0	0	0	0	0	5	2	1	1	5	3.7	5.55556	3.96825	3.81818	4.36364	4.6	3.5	2.2
1994	2	18	2	1	1	2	2	1	1	1	0	0	0	0	0	0	0	5	2	1	1	5	3.7	5.55556	3.96825	3.81818	4.36364	4.6	3.5	2.2
1995	2	18	2	1	1	2	2	1	1	1	0	0	0	0	0	0	0	5	2	1	1	5	3.7	5.55556	3.96825	3.81818	4.36364	4.6	3.5	2.2
1996	2	18	2	1	1	2	2	1	1	1	0	0	0	0	0	0	0	5	2	1	1	5	3.7	5.55556	3.96825	3.81818	4.36364	4.6	3.5	2.2
1997	1	20	1	1	2	2	3	1	0	1	0	0	0	0	0	0	0	4	3	2	1	3	1.9	4	2.85714	3	3	3	3	3
1998	1	20	1	1	2	2	3	1	0	1	0	0	0	0	0	0	0	4	3	2	1	3	1.9	4	2.85714	3	3	3	3	3
1999	1	20	1	1	2	2	3	1	0	1	0	0	0	0	0	0	0	4	3	2	1	3	1.9	4	2.85714	3	3	3	3	3
2003	1	20	1	1	2	2	3	1	0	1	0	0	0	0	0	0	0	4	3	2	1	3	1.9	4	2.85714	3	3	3	3	3
2004	1	19	1	1	1	2	3	1	0	1	0	0	0	0	0	0	0	5	2	2	2	2	1.5	1.55556	1.11111	2.36364	3.81818	4	3.33333	2.6
2005	1	19	1	1	1	2	3	1	0	1	0	0	0	0	0	0	0	5	2	2	2	2	1.5	1.55556	1.11111	2.36364	3.81818	4	3.33333	2.6
2006	1	19	1	1	1	2	3	1	0	1	0	0	0	0	0	0	0	5	2	2	2	2	1.5	1.55556	1.11111	2.36364	3.81818	4	3.33333	2.6
2011	1	19	1	1	1	2	3	1	0	1	0	0	0	0	0	0	0	5	2	2	2	2	1.5	1.55556	1.11111	2.36364	3.81818	4	3.33333	2.6
2012	2	19	1	1	2	2	3	1	1	1	1	0	0	0	0	0	0	7	4	2	2.66667	3.5	2.1	3.77778	2.69841	2.90909	3.09091	4.1	2.75	3.5
2013	2	19	1	1	2	2	3	1	1	1	1	0	0	0	0	0	0	7	4	2	2.66667	3.5	2.1	3.77778	2.69841	2.90909	3.09091	4.1	2.75	3.5
2014	2	19	1	1	2	2	3	1	1	1	1	0	0	0	0	0	0	7	4	2	2.66667	3.5	2.1	3.77778	2.69841	2.90909	3.09091	4.1	2.75	3.5
2015	2	19	1	1	2	2	3	1	1	1	1	0	0	0	0	0	0	7	4	2	2.66667	3.5	2.1	3.77778	2.69841	2.90909	3.09091	4.1	2.75	3.5
2016	2	19	1	1	2	2	3	1	1	1	1	0	0	0	0	0	0	7	4	2	2.66667	3.5	2.1	3.77778	2.69841	2.90909	3.09091	4.1	2.75	3.5
2017	2	19	1	1	2	2	3	1	1	1	1	0	0	0	0	0	0	7	4	2	2.66667	3.5	2.1	3.77778	2.69841	2.90909	3.09091	4.1	2.75	3.5
2018	2	19	1	1	2	2	3	1	1	1	1	0	0	0	0	0	0	7	4	2	2.66667	3.5	2.1	3.77778	2.69841	2.90909	3.09091	4.1	2.75	3.5
2019	2	19	1	1	2	2	3	1	1	1	1	0	0	0	0	0	0	7	4	2	2.66667	3.5	2.1	3.77778	2.69841	2.90909	3.09091	4.1	2.75	3.5
2020	2	19	1	1	2	2	3	1	1	1	0	1	0	0	0	0	0	7	7	2	3.66667	3.5	1.8	2.33333	1.66667	2.72727	2.63636	3	2.33333	3.4
2021	2	19	1	1	2	2	3	1	1	1	0	1	0	0	0	0	0	7	7	2	3.66667	3.5	1.8	2.33333	1.66667	2.72727	2.63636	3	2.33333	3.4
2022	2	19	1	1	2	2	3	1	1	1	0	1	0	0	0	0	0	7	7	2	3.66667	3.5	1.8	2.33333	1.66667	2.72727	2.63636	3	2.33333	3.4
2026	2	19	1	1	2	2	3	1	1	1	0	1	0	0	0	0	0	7	7	2	3.66667	3.5	1.8	2.33333	1.66667	2.72727	2.63636	3	2.33333	3.4
2027	2	20	2	2	2	2	4	1	1	1	0	0	0	0	0	0	0	7	9	2	1.5	3	1	4	2.85714	1.72727	1.72727	4.6	1	4.9
2028	2	20	2	2	2	2	4	1	1	1	0	0	0	0	0	0	0	7	9	2	1.5	3	1	4	2.85714	1.72727	1.72727	4.6	1	4.9
2029	2	20	2	2	2	2	4	1	1	1	0	0	0	0	0	0	0	7	9	2	1.5	3	1	4	2.85714	1.72727	1.72727	4.6	1	4.9
2031	2	20	2	2	2	2	4	1	1	1	0	0	0	0	0	0	0	7	9	2	1.5	3	1	4	2.85714	1.72727	1.72727	4.6	1	4.9
2032	2	18	2	1	2	1	3	1	1	1	0	1	0	0	0	0	0	3	7	2	2.16667	3	2.2	2.44444	1.74603	1.72727	1.27273	5	1.25	4.6
2033	2	18	2	1	2	1	3	1	1	1	0	1	0	0	0	0	0	3	7	2	2.16667	3	2.2	2.44444	1.74603	1.72727	1.27273	5	1.25	4.6
2034	2	18	2	1	2	1	3	1	1	1	0	1	0	0	0	0	0	3	7	2	2.16667	3	2.2	2.44444	1.74603	1.72727	1.27273	5	1.25	4.6
2048	2	18	2	1	2	1	3	1	1	1	0	1	0	0	0	0	0	3	7	2	2.16667	3	2.2	2.44444	1.74603	1.72727	1.27273	5	1.25	4.6
2049	2	20	1	1	2	2	2	0	1	0	0	1	0	0	0	0	1	3	4	1	4.16667	3	2.4	3.11111	2.22222	2.18182	3.72727	3.5	3.66667	2.8
2050	2	20	1	1	2	2	2	0	1	0	0	1	0	0	0	0	1	3	4	1	4.16667	3	2.4	3.11111	2.22222	2.18182	3.72727	3.5	3.66667	2.8
2051	2	20	1	1	2	2	2	0	1	0	0	1	0	0	0	0	1	3	4	1	4.16667	3	2.4	3.11111	2.22222	2.18182	3.72727	3.5	3.66667	2.8
2062	2	20	1	1	2	2	2	0	1	0	0	1	0	0	0	0	1	3	4	1	4.16667	3	2.4	3.11111	2.22222	2.18182	3.72727	3.5	3.66667	2.8
2063	1	18	1	1	2	2	4	1	1	1	0	0	0	0	0	0	0	7	5	2	1.16667	3	2.2	4	2.85714	3	3	3	3	3.4
2064	1	18	1	1	2	2	4	1	1	1	0	0	0	0	0	0	0	7	5	2	1.16667	3	2.2	4	2.85714	3	3	3	3	3.4
2065	1	18	1	1	2	2	4	1	1	1	0	0	0	0	0	0	0	7	5	2	1.16667	3	2.2	4	2.85714	3	3	3	3	3.4
2068	1	18	1	1	2	2	4	1	1	1	0	0	0	0	0	0	0	7	5	2	1.16667	3	2.2	4	2.85714	3	3	3	3	3.4
2069	2	20	2	2	1	1	3	1	1	1	0	0	0	0	0	0	0	7	4	1	1.83333	4	3.8	3.55556	2.53968	3.09091	3.45455	4.9	3.25	3.2
2070	2	20	2	2	1	1	3	1	1	1	0	0	0	0	0	0	0	7	4	1	1.83333	4	3.8	3.55556	2.53968	3.09091	3.45455	4.9	3.25	3.2
2071	2	20	2	2	1	1	3	1	1	1	0	0	0	0	0	0	0	7	4	1	1.83333	4	3.8	3.55556	2.53968	3.09091	3.45455	4.9	3.25	3.2
2072	2	20	2	2	1	1	3	1	1	1	0	0	0	0	0	0	0	7	4	1	1.83333	4	3.8	3.55556	2.53968	3.09091	3.45455	4.9	3.25	3.2
2073	2	19	1	1	2	2	3	1	1	1	0	0	0	0	0	0	0	4	2	2	2.83333	2.5	2.5	2.66667	1.90476	2.54545	2.63636	4	3	3.6
2074	2	19	1	1	2	2	3	1	1	1	0	0	0	0	0	0	0	4	2	2	2.83333	2.5	2.5	2.66667	1.90476	2.54545	2.63636	4	3	3.6
2075	2	19	1	1	2	2	3	1	1	1	0	0	0	0	0	0	0	4	2	2	2.83333	2.5	2.5	2.66667	1.90476	2.54545	2.63636	4	3	3.6
2077	2	19	1	1	2	2	3	1	1	1	0	0	0	0	0	0	0	4	2	2	2.83333	2.5	2.5	2.66667	1.90476	2.54545	2.63636	4	3	3.6
2078	2	19	1	1	2	2	3	1	1	1	0	0	0	0	0	0	0	4	2	2	2.83333	2.5	2.5	2.66667	1.90476	2.54545	2.63636	4	3	3.6
2079	2	19	1	1	2	2	3	1	1	1	0	0	0	0	0	0	0	4	2	2	2.83333	2.5	2.5	2.66667	1.90476	2.54545	2.63636	4	3	3.6
2080	2	19	1	1	2	2	3	1	1	1	0	0	0	0	0	0	0	4	2	2	2.83333	2.5	2.5	2.66667	1.90476	2.54545	2.63636	4	3	3.6
2081	2	19	1	1	2	2	3	1	1	1	0	0	0	0	0	0	0	4	2	2	2.83333	2.5	2.5	2.66667	1.90476	2.54545	2.63636	4	3	3.6
2082	2	18	1	1	2	2	3	1	1	1	0	0	1	0	0	0	0	7	1	2	2.33333	2	2.2	4.22222	3.01587	3	3.09091	3.7	3.91667	2.7
2083	2	18	1	1	2	2	3	1	1	1	0	0	1	0	0	0	0	7	1	2	2.33333	2	2.2	4.22222	3.01587	3	3.09091	3.7	3.91667	2.7
2084	2	18	1	1	2	2	3	1	1	1	0	0	1	0	0	0	0	7	1	2	2.33333	2	2.2	4.22222	3.01587	3	3.09091	3.7	3.91667	2.7
2085	2	18	1	1	2	2	3	1	1	1	0	0	1	0	0	0	0	7	1	2	2.33333	2	2.2	4.22222	3.01587	3	3.09091	3.7	3.91667	2.7
2086	1	19	2	1	2	2	4	1	0	0	0	0	0	0	0	0	0	7	2	2	2.66667	2.25	2.3	2.22222	1.5873	2.72727	3.27273	3.5	3.41667	2.8
2087	1	19	2	1	2	2	4	1	0	0	0	0	0	0	0	0	0	7	2	2	2.66667	2.25	2.3	2.22222	1.5873	2.72727	3.27273	3.5	3.41667	2.8
2088	1	19	2	1	2	2	4	1	0	0	0	0	0	0	0	0	0	7	2	2	2.66667	2.25	2.3	2.22222	1.5873	2.72727	3.27273	3.5	3.41667	2.8
2089	1	19	2	1	2	2	4	1	0	0	0	0	0	0	0	0	0	7	2	2	2.66667	2.25	2.3	2.22222	1.5873	2.72727	3.27273	3.5	3.41667	2.8
2090	2	19	2	1	1	1	3	1	1	1	0	1	0	0	0	0	0	7	7	2	1.83333	4.75	3.3	4.77778	3.4127	3.81818	2.81818	5	3.41667	3.3
2091	2	19	2	1	1	1	3	1	1	1	0	1	0	0	0	0	0	7	7	2	1.83333	4.75	3.3	4.77778	3.4127	3.81818	2.81818	5	3.41667	3.3
2092	2	19	2	1	1	1	3	1	1	1	0	1	0	0	0	0	0	7	7	2	1.83333	4.75	3.3	4.77778	3.4127	3.81818	2.81818	5	3.41667	3.3
2093	2	19	2	1	1	1	3	1	1	1	0	1	0	0	0	0	0	7	7	2	1.83333	4.75	3.3	4.77778	3.4127	3.81818	2.81818	5	3.41667	3.3
2094	2	19	2	1	1	1	3	1	1	1	0	1	0	0	0	0	0	7	7	2	1.83333	4.75	3.3	4.77778	3.4127	3.81818	2.81818	5	3.41667	3.3
2095	2	19	2	1	1	1	3	1	1	1	0	1	0	0	0	0	0	7	7	2	1.83333	4.75	3.3	4.77778	3.4127	3.81818	2.81818	5	3.41667	3.3
2096	2	19	2	1	1	1	3	1	1	1	0	1	0	0	0	0	0	7	7	2	1.83333	4.75	3.3	4.77778	3.4127	3.81818	2.81818	5	3.41667	3.3
2098	2	19	2	1	1	1	3	1	1	1	0	1	0	0	0	0	0	7	7	2	1.83333	4.75	3.3	4.77778	3.4127	3.81818	2.81818	5	3.41667	3.3
2099	1	19	1	1	1	1	3	1	1	1	0	1	1	0	1	1	0	4	4	1	1	2	1.5	2.88889	2.06349	3.09091	2.09091	4.9	2.5	4.8
2100	1	19	1	1	1	1	3	1	1	1	0	1	1	0	1	1	0	4	4	1	1	2	1.5	2.88889	2.06349	3.09091	2.09091	4.9	2.5	4.8
2101	1	19	1	1	1	1	3	1	1	1	0	1	1	0	1	1	0	4	4	1	1	2	1.5	2.88889	2.06349	3.09091	2.09091	4.9	2.5	4.8
2102	1	19	1	1	1	1	3	1	1	1	0	1	1	0	1	1	0	4	4	1	1	2	1.5	2.88889	2.06349	3.09091	2.09091	4.9	2.5	4.8
2103	2	19	2	1	1	1	2	1	1	1	0	1	0	0	1	0	0	4	9	1	4	5	3	4.55556	3.25397	4.27273	4.63636	4.7	2.75	2.4
2104	2	19	2	1	1	1	2	1	1	1	0	1	0	0	1	0	0	4	9	1	4	5	3	4.55556	3.25397	4.27273	4.63636	4.7	2.75	2.4
2105	2	19	2	1	1	1	2	1	1	1	0	1	0	0	1	0	0	4	9	1	4	5	3	4.55556	3.25397	4.27273	4.63636	4.7	2.75	2.4
2106	2	19	2	1	1	1	2	1	1	1	0	1	0	0	1	0	0	4	9	1	4	5	3	4.55556	3.25397	4.27273	4.63636	4.7	2.75	2.4
2107	2	19	2	1	1	1	2	1	1	1	0	1	0	0	1	0	0	4	9	1	4	5	3	4.55556	3.25397	4.27273	4.63636	4.7	2.75	2.4
2108	2	19	2	1	1	1	2	1	1	1	0	1	0	0	1	0	0	4	9	1	4	5	3	4.55556	3.25397	4.27273	4.63636	4.7	2.75	2.4
2109	2	19	2	1	1	1	2	1	1	1	0	1	0	0	1	0	0	4	9	1	4	5	3	4.55556	3.25397	4.27273	4.63636	4.7	2.75	2.4
2113	2	19	2	1	1	1	2	1	1	1	0	1	0	0	1	0	0	4	9	1	4	5	3	4.55556	3.25397	4.27273	4.63636	4.7	2.75	2.4
2114	2	19	2	1	1	1	2	1	1	1	0	1	0	0	1	0	0	4	9	1	4	5	3	4.55556	3.25397	4.27273	4.63636	4.7	2.75	2.4
2115	2	19	2	1	1	1	2	1	1	1	0	1	0	0	1	0	0	4	9	1	4	5	3	4.55556	3.25397	4.27273	4.63636	4.7	2.75	2.4
2116	2	19	2	1	1	1	2	1	1	1	0	1	0	0	1	0	0	4	9	1	4	5	3	4.55556	3.25397	4.27273	4.63636	4.7	2.75	2.4
2117	2	19	2	1	1	1	2	1	1	1	0	1	0	0	1	0	0	4	9	1	4	5	3	4.55556	3.25397	4.27273	4.63636	4.7	2.75	2.4
2118	2	19	2	1	1	1	2	1	1	1	0	1	0	0	1	0	0	4	9	1	4	5	3	4.55556	3.25397	4.27273	4.63636	4.7	2.75	2.4
2119	2	19	2	1	1	1	2	1	1	1	0	1	0	0	1	0	0	4	9	1	4	5	3	4.55556	3.25397	4.27273	4.63636	4.7	2.75	2.4
2120	2	19	2	1	1	1	2	1	1	1	0	1	0	0	1	0	0	4	9	1	4	5	3	4.55556	3.25397	4.27273	4.63636	4.7	2.75	2.4
2123	2	19	2	1	1	1	2	1	1	1	0	1	0	0	1	0	0	4	9	1	4	5	3	4.55556	3.25397	4.27273	4.63636	4.7	2.75	2.4
2124	2	18	2	1	2	2	2	1	1	1	0	1	0	0	0	1	0	4	5	2	5.83333	2	2.6	2.77778	1.98413	3.54545	3.18182	2.3	3.91667	2.8
2125	2	18	2	1	2	2	2	1	1	1	0	1	0	0	0	1	0	4	5	2	5.83333	2	2.6	2.77778	1.98413	3.54545	3.18182	2.3	3.91667	2.8
2126	2	18	2	1	2	2	2	1	1	1	0	1	0	0	0	1	0	4	5	2	5.83333	2	2.6	2.77778	1.98413	3.54545	3.18182	2.3	3.91667	2.8
2127	2	18	2	1	2	2	2	1	1	1	0	1	0	0	0	1	0	4	5	2	5.83333	2	2.6	2.77778	1.98413	3.54545	3.18182	2.3	3.91667	2.8
2128	1	18	1	1	2	2	3	1	1	0	0	0	0	0	0	0	0	2	2	1	1	2	1	1	0.714286	1.72727	1.36364	4	1	4
2129	1	18	1	1	2	2	3	1	1	0	0	0	0	0	0	0	0	2	2	1	1	2	1	1	0.714286	1.72727	1.36364	4	1	4
2130	1	18	1	1	2	2	3	1	1	0	0	0	0	0	0	0	0	2	2	1	1	2	1	1	0.714286	1.72727	1.36364	4	1	4
2133	1	18	1	1	2	2	3	1	1	0	0	0	0	0	0	0	0	2	2	1	1	2	1	1	0.714286	1.72727	1.36364	4	1	4
2134	1	18	1	1	2	2	3	1	1	0	0	0	0	0	0	0	0	2	2	1	1	2	1	1	0.714286	1.72727	1.36364	4	1	4
2135	1	18	1	1	2	2	3	1	1	0	0	0	0	0	0	0	0	2	2	1	1	2	1	1	0.714286	1.72727	1.36364	4	1	4
2136	1	18	1	1	2	2	3	1	1	0	0	0	0	0	0	0	0	2	2	1	1	2	1	1	0.714286	1.72727	1.36364	4	1	4
2141	1	18	1	1	2	2	3	1	1	0	0	0	0	0	0	0	0	2	2	1	1	2	1	1	0.714286	1.72727	1.36364	4	1	4
2142	2	19	2	1	1	2	2	1	1	1	0	1	0	0	0	0	1	4	8	2	1	2.75	1.1	1	0.714286	2.63636	1.18182	5	1	3.9
2143	2	19	2	1	1	2	2	1	1	1	0	1	0	0	0	0	1	4	8	2	1	2.75	1.1	1	0.714286	2.63636	1.18182	5	1	3.9
2144	2	19	2	1	1	2	2	1	1	1	0	1	0	0	0	0	1	4	8	2	1	2.75	1.1	1	0.714286	2.63636	1.18182	5	1	3.9
2155	2	19	2	1	1	2	2	1	1	1	0	1	0	0	0	0	1	4	8	2	1	2.75	1.1	1	0.714286	2.63636	1.18182	5	1	3.9
2156	2	19	2	1	1	2	2	1	1	1	0	1	0	0	0	0	1	4	8	2	1	2.75	1.1	1	0.714286	2.63636	1.18182	5	1	3.9
2157	2	19	2	1	1	2	2	1	1	1	0	1	0	0	0	0	1	4	8	2	1	2.75	1.1	1	0.714286	2.63636	1.18182	5	1	3.9
2158	2	19	2	1	1	2	2	1	1	1	0	1	0	0	0	0	1	4	8	2	1	2.75	1.1	1	0.714286	2.63636	1.18182	5	1	3.9
2159	2	19	2	1	1	2	2	1	1	1	0	1	0	0	0	0	1	4	8	2	1	2.75	1.1	1	0.714286	2.63636	1.18182	5	1	3.9
2160	2	19	2	1	2	2	2	1	1	1	0	0	0	0	0	0	0	4	3	2	1	2.5	2	1	0.714286	3.54545	2.81818	4	2.41667	4
2161	2	19	2	1	2	2	2	1	1	1	0	0	0	0	0	0	0	4	3	2	1	2.5	2	1	0.714286	3.54545	2.81818	4	2.41667	4
2162	2	19	2	1	2	2	2	1	1	1	0	0	0	0	0	0	0	4	3	2	1	2.5	2	1	0.714286	3.54545	2.81818	4	2.41667	4
2163	2	19	2	1	2	2	2	1	1	1	0	0	0	0	0	0	0	4	3	2	1	2.5	2	1	0.714286	3.54545	2.81818	4	2.41667	4
2164	2	19	2	1	2	2	2	1	1	1	0	0	0	0	0	0	0	4	3	2	1	2.5	2	1	0.714286	3.54545	2.81818	4	2.41667	4
2165	2	19	2	1	2	2	2	1	1	1	0	0	0	0	0	0	0	4	3	2	1	2.5	2	1	0.714286	3.54545	2.81818	4	2.41667	4
2166	2	19	2	1	2	2	2	1	1	1	0	0	0	0	0	0	0	4	3	2	1	2.5	2	1	0.714286	3.54545	2.81818	4	2.41667	4
2167	2	19	2	1	2	2	2	1	1	1	0	0	0	0	0	0	0	4	3	2	1	2.5	2	1	0.714286	3.54545	2.81818	4	2.41667	4
2168	2	19	1	1	2	2	2	1	1	1	1	1	0	0	0	0	0	4	2	2	4.83333	2.5	3.6	4.33333	3.09524	3.54545	3.45455	3.9	3.83333	2.3
2169	2	19	1	1	2	2	2	1	1	1	1	1	0	0	0	0	0	4	2	2	4.83333	2.5	3.6	4.33333	3.09524	3.54545	3.45455	3.9	3.83333	2.3
2170	2	19	1	1	2	2	2	1	1	1	1	1	0	0	0	0	0	4	2	2	4.83333	2.5	3.6	4.33333	3.09524	3.54545	3.45455	3.9	3.83333	2.3
2171	2	19	1	1	2	2	2	1	1	1	1	1	0	0	0	0	0	4	2	2	4.83333	2.5	3.6	4.33333	3.09524	3.54545	3.45455	3.9	3.83333	2.3
2172	2	20	2	2	2	2	2	1	1	1	1	1	0	0	0	0	0	7	5	1	4.33333	4.5	3.2	4.22222	3.01587	2.81818	3.18182	3	3.25	3.2
2173	2	20	2	2	2	2	2	1	1	1	1	1	0	0	0	0	0	7	5	1	4.33333	4.5	3.2	4.22222	3.01587	2.81818	3.18182	3	3.25	3.2
2174	2	20	2	2	2	2	2	1	1	1	1	1	0	0	0	0	0	7	5	1	4.33333	4.5	3.2	4.22222	3.01587	2.81818	3.18182	3	3.25	3.2
2175	2	20	2	2	2	2	2	1	1	1	1	1	0	0	0	0	0	7	5	1	4.33333	4.5	3.2	4.22222	3.01587	2.81818	3.18182	3	3.25	3.2
2176	1	20	1	1	1	2	2	1	1	1	0	0	0	0	0	1	0	6	3	1	5.83333	3.75	2.9	6.66667	4.7619	4.27273	4.81818	5	5	2.6
2177	1	20	1	1	1	2	2	1	1	1	0	0	0	0	0	1	0	6	3	1	5.83333	3.75	2.9	6.66667	4.7619	4.27273	4.81818	5	5	2.6
2178	1	20	1	1	1	2	2	1	1	1	0	0	0	0	0	1	0	6	3	1	5.83333	3.75	2.9	6.66667	4.7619	4.27273	4.81818	5	5	2.6
2179	1	20	1	1	1	2	2	1	1	1	0	0	0	0	0	1	0	6	3	1	5.83333	3.75	2.9	6.66667	4.7619	4.27273	4.81818	5	5	2.6
2180	1	20	1	1	1	2	2	1	1	1	0	0	0	0	0	1	0	6	3	1	5.83333	3.75	2.9	6.66667	4.7619	4.27273	4.81818	5	5	2.6
2181	1	20	1	1	1	2	2	1	1	1	0	0	0	0	0	1	0	6	3	1	5.83333	3.75	2.9	6.66667	4.7619	4.27273	4.81818	5	5	2.6
2182	1	20	1	1	1	2	2	1	1	1	0	0	0	0	0	1	0	6	3	1	5.83333	3.75	2.9	6.66667	4.7619	4.27273	4.81818	5	5	2.6
2183	1	20	1	1	1	2	2	1	1	1	0	0	0	0	0	1	0	6	3	1	5.83333	3.75	2.9	6.66667	4.7619	4.27273	4.81818	5	5	2.6
2184	2	19	2	1	2	2	3	1	1	1	0	1	0	0	0	0	1	7	4	2	3.16667	3	2.3	3.55556	2.53968	3.27273	2.54545	4.5	2.41667	3.3
2185	2	19	2	1	2	2	3	1	1	1	0	1	0	0	0	0	1	7	4	2	3.16667	3	2.3	3.55556	2.53968	3.27273	2.54545	4.5	2.41667	3.3
2186	2	19	2	1	2	2	3	1	1	1	0	1	0	0	0	0	1	7	4	2	3.16667	3	2.3	3.55556	2.53968	3.27273	2.54545	4.5	2.41667	3.3
2187	2	19	2	1	2	2	3	1	1	1	0	1	0	0	0	0	1	7	4	2	3.16667	3	2.3	3.55556	2.53968	3.27273	2.54545	4.5	2.41667	3.3
2188	2	19	1	1	2	2	4	1	1	1	1	0	0	0	0	0	0	5	2	2	1	1.75	1	2.77778	1.98413	1.72727	1.72727	1	1	3.4
2189	2	19	1	1	2	2	4	1	1	1	1	0	0	0	0	0	0	5	2	2	1	1.75	1	2.77778	1.98413	1.72727	1.72727	1	1	3.4
2190	2	19	1	1	2	2	4	1	1	1	1	0	0	0	0	0	0	5	2	2	1	1.75	1	2.77778	1.98413	1.72727	1.72727	1	1	3.4
2191	2	19	1	1	2	2	4	1	1	1	1	0	0	0	0	0	0	5	2	2	1	1.75	1	2.77778	1.98413	1.72727	1.72727	1	1	3.4
2192	2	19	2	1	1	2	2	1	1	0	0	0	0	0	0	0	0	3	3	2	4	2.75	2.6	4.22222	3.01587	2.81818	3.81818	3.2	3.83333	2.6
2193	2	19	2	1	1	2	2	1	1	0	0	0	0	0	0	0	0	3	3	2	4	2.75	2.6	4.22222	3.01587	2.81818	3.81818	3.2	3.83333	2.6
2194	2	19	2	1	1	2	2	1	1	0	0	0	0	0	0	0	0	3	3	2	4	2.75	2.6	4.22222	3.01587	2.81818	3.81818	3.2	3.83333	2.6
2195	2	19	2	1	1	2	2	1	1	0	0	0	0	0	0	0	0	3	3	2	4	2.75	2.6	4.22222	3.01587	2.81818	3.81818	3.2	3.83333	2.6
2196	2	19	1	1	2	2	4	1	1	1	1	0	0	0	0	0	0	5	2	2	1	1.75	1	2.77778	1.98413	1.72727	1.72727	1	1	3.4
2197	2	19	1	1	2	2	4	1	1	1	1	0	0	0	0	0	0	5	2	2	1	1.75	1	2.77778	1.98413	1.72727	1.72727	1	1	3.4
2198	2	19	1	1	2	2	4	1	1	1	1	0	0	0	0	0	0	5	2	2	1	1.75	1	2.77778	1.98413	1.72727	1.72727	1	1	3.4
2199	2	19	1	1	2	2	4	1	1	1	1	0	0	0	0	0	0	5	2	2	1	1.75	1	2.77778	1.98413	1.72727	1.72727	1	1	3.4
2200	2	18	2	1	1	2	4	1	1	1	1	1	1	1	1	1	0	7	9	2	4	2.5	4.4	5.33333	3.80952	4.45455	3.90909	4	5	2.6
2201	2	18	2	1	1	2	4	1	1	1	1	1	1	1	1	1	0	7	9	2	4	2.5	4.4	5.33333	3.80952	4.45455	3.90909	4	5	2.6
2202	2	18	2	1	1	2	4	1	1	1	1	1	1	1	1	1	0	7	9	2	4	2.5	4.4	5.33333	3.80952	4.45455	3.90909	4	5	2.6
2203	2	18	2	1	1	2	4	1	1	1	1	1	1	1	1	1	0	7	9	2	4	2.5	4.4	5.33333	3.80952	4.45455	3.90909	4	5	2.6
2204	2	20	2	2	1	2	2	1	1	0	0	0	0	0	0	0	0	4	7	1	5.16667	4.25	3.8	5.88889	4.20635	4.27273	4.09091	2.5	4	2.2
2205	2	20	2	2	1	2	2	1	1	0	0	0	0	0	0	0	0	4	7	1	5.16667	4.25	3.8	5.88889	4.20635	4.27273	4.09091	2.5	4	2.2
2206	2	20	2	2	1	2	2	1	1	0	0	0	0	0	0	0	0	4	7	1	5.16667	4.25	3.8	5.88889	4.20635	4.27273	4.09091	2.5	4	2.2
2207	2	20	2	2	1	2	2	1	1	0	0	0	0	0	0	0	0	4	7	1	5.16667	4.25	3.8	5.88889	4.20635	4.27273	4.09091	2.5	4	2.2
2208	2	20	2	1	1	2	2	1	1	1	0	0	0	0	0	0	0	2	2	2	2.33333	2.25	2.5	3.55556	2.53968	2.90909	3	4	3.5	3
2209	2	20	2	1	1	2	2	1	1	1	0	0	0	0	0	0	0	2	2	2	2.33333	2.25	2.5	3.55556	2.53968	2.90909	3	4	3.5	3
2210	2	20	2	1	1	2	2	1	1	1	0	0	0	0	0	0	0	2	2	2	2.33333	2.25	2.5	3.55556	2.53968	2.90909	3	4	3.5	3
2211	2	20	2	1	1	2	2	1	1	1	0	0	0	0	0	0	0	2	2	2	2.33333	2.25	2.5	3.55556	2.53968	2.90909	3	4	3.5	3
2212	1	19	1	1	2	2	2	1	1	1	0	0	0	0	0	0	0	7	2	1	4	3.5	3	4.11111	2.93651	3.18182	3.36364	3.5	3.5	3.1
2213	1	19	1	1	2	2	2	1	1	1	0	0	0	0	0	0	0	7	2	1	4	3.5	3	4.11111	2.93651	3.18182	3.36364	3.5	3.5	3.1
2214	1	19	1	1	2	2	2	1	1	1	0	0	0	0	0	0	0	7	2	1	4	3.5	3	4.11111	2.93651	3.18182	3.36364	3.5	3.5	3.1
2215	1	19	1	1	2	2	2	1	1	1	0	0	0	0	0	0	0	7	2	1	4	3.5	3	4.11111	2.93651	3.18182	3.36364	3.5	3.5	3.1
2216	2	20	2	1	1	2	3	1	0	0	0	0	0	0	0	0	0	7	7	1	2	2.75	2.2	5	3.57143	3.18182	3.63636	4	3.41667	2.9
2217	2	20	2	1	1	2	3	1	0	0	0	0	0	0	0	0	0	7	7	1	2	2.75	2.2	5	3.57143	3.18182	3.63636	4	3.41667	2.9
2218	2	20	2	1	1	2	3	1	0	0	0	0	0	0	0	0	0	7	7	1	2	2.75	2.2	5	3.57143	3.18182	3.63636	4	3.41667	2.9
2219	2	20	2	1	1	2	3	1	0	0	0	0	0	0	0	0	0	7	7	1	2	2.75	2.2	5	3.57143	3.18182	3.63636	4	3.41667	2.9
2220	1	20	1	1	1	1	3	1	1	1	0	0	0	0	0	0	0	2	2	2	3	3.75	2.5	1.44444	1.03175	3.63636	4.36364	3.6	2.33333	3
2221	1	20	1	1	1	1	3	1	1	1	0	0	0	0	0	0	0	2	2	2	3	3.75	2.5	1.44444	1.03175	3.63636	4.36364	3.6	2.33333	3
2222	1	20	1	1	1	1	3	1	1	1	0	0	0	0	0	0	0	2	2	2	3	3.75	2.5	1.44444	1.03175	3.63636	4.36364	3.6	2.33333	3
2223	1	20	1	1	1	1	3	1	1	1	0	0	0	0	0	0	0	2	2	2	3	3.75	2.5	1.44444	1.03175	3.63636	4.36364	3.6	2.33333	3
2224	2	19	1	1	1	2	3	1	1	1	0	0	0	0	0	0	0	7	2	2	2.16667	5	2.7	4	2.85714	2.63636	3	3	3	3
2225	2	19	1	1	1	2	3	1	1	1	0	0	0	0	0	0	0	7	2	2	2.16667	5	2.7	4	2.85714	2.63636	3	3	3	3
2226	2	19	1	1	1	2	3	1	1	1	0	0	0	0	0	0	0	7	2	2	2.16667	5	2.7	4	2.85714	2.63636	3	3	3	3
2227	2	19	1	1	1	2	3	1	1	1	0	0	0	0	0	0	0	7	2	2	2.16667	5	2.7	4	2.85714	2.63636	3	3	3	3
2228	2	20	2	1	2	2	3	1	1	1	0	1	0	0	0	0	0	7	5	2	6.16667	3.25	3.9	4.11111	2.93651	3.81818	3.90909	4	4.08333	3
2229	2	20	2	1	2	2	3	1	1	1	0	1	0	0	0	0	0	7	5	2	6.16667	3.25	3.9	4.11111	2.93651	3.81818	3.90909	4	4.08333	3
2230	2	20	2	1	2	2	3	1	1	1	0	1	0	0	0	0	0	7	5	2	6.16667	3.25	3.9	4.11111	2.93651	3.81818	3.90909	4	4.08333	3
2231	2	20	2	1	2	2	3	1	1	1	0	1	0	0	0	0	0	7	5	2	6.16667	3.25	3.9	4.11111	2.93651	3.81818	3.90909	4	4.08333	3
2232	2	19	1	1	2	2	2	1	1	1	0	0	0	0	0	0	0	4	1	2	2.66667	2	3	4.44444	3.1746	3.36364	3.36364	4	3.75	3.2
2233	2	19	1	1	2	2	2	1	1	1	0	0	0	0	0	0	0	4	1	2	2.66667	2	3	4.44444	3.1746	3.36364	3.36364	4	3.75	3.2
2234	2	19	1	1	2	2	2	1	1	1	0	0	0	0	0	0	0	4	1	2	2.66667	2	3	4.44444	3.1746	3.36364	3.36364	4	3.75	3.2
2235	2	19	1	1	2	2	2	1	1	1	0	0	0	0	0	0	0	4	1	2	2.66667	2	3	4.44444	3.1746	3.36364	3.36364	4	3.75	3.2
2236	2	19	2	1	1	2	2	1	1	1	0	0	0	0	0	0	0	2	1	2	3	3.25	3	3.22222	2.30159	3	3.54545	4.9	3.08333	3.5
2237	2	19	2	1	1	2	2	1	1	1	0	0	0	0	0	0	0	2	1	2	3	3.25	3	3.22222	2.30159	3	3.54545	4.9	3.08333	3.5
2238	2	19	2	1	1	2	2	1	1	1	0	0	0	0	0	0	0	2	1	2	3	3.25	3	3.22222	2.30159	3	3.54545	4.9	3.08333	3.5
2239	2	19	2	1	1	2	2	1	1	1	0	0	0	0	0	0	0	2	1	2	3	3.25	3	3.22222	2.30159	3	3.54545	4.9	3.08333	3.5
2240	2	20	2	1	2	2	3	1	1	1	1	0	0	0	0	0	0	4	4	2	4.16667	2	2.5	3.77778	2.69841	3.54545	3.81818	3.8	3.66667	3.3
2241	2	20	2	1	2	2	3	1	1	1	1	0	0	0	0	0	0	4	4	2	4.16667	2	2.5	3.77778	2.69841	3.54545	3.81818	3.8	3.66667	3.3
2242	2	20	2	1	2	2	3	1	1	1	1	0	0	0	0	0	0	4	4	2	4.16667	2	2.5	3.77778	2.69841	3.54545	3.81818	3.8	3.66667	3.3
2243	2	20	2	1	2	2	3	1	1	1	1	0	0	0	0	0	0	4	4	2	4.16667	2	2.5	3.77778	2.69841	3.54545	3.81818	3.8	3.66667	3.3
2244	1	18	2	1	1	1	4	1	1	1	0	0	0	0	1	1	0	7	9	1	3	4.5	2.9	5.22222	3.73016	3	3.63636	4.4	3.83333	2.9
2245	1	18	2	1	1	1	4	1	1	1	0	0	0	0	1	1	0	7	9	1	3	4.5	2.9	5.22222	3.73016	3	3.63636	4.4	3.83333	2.9
2246	1	18	2	1	1	1	4	1	1	1	0	0	0	0	1	1	0	7	9	1	3	4.5	2.9	5.22222	3.73016	3	3.63636	4.4	3.83333	2.9
2247	1	18	2	1	1	1	4	1	1	1	0	0	0	0	1	1	0	7	9	1	3	4.5	2.9	5.22222	3.73016	3	3.63636	4.4	3.83333	2.9
2248	1	20	2	1	1	2	3	1	1	1	0	1	0	0	0	1	0	4	2	1	2	2	2	1.44444	1.03175	3.18182	3.72727	4.3	3.16667	4.1
2249	1	20	2	1	1	2	3	1	1	1	0	1	0	0	0	1	0	4	2	1	2	2	2	1.44444	1.03175	3.18182	3.72727	4.3	3.16667	4.1
2250	1	20	2	1	1	2	3	1	1	1	0	1	0	0	0	1	0	4	2	1	2	2	2	1.44444	1.03175	3.18182	3.72727	4.3	3.16667	4.1
2251	1	20	2	1	1	2	3	1	1	1	0	1	0	0	0	1	0	4	2	1	2	2	2	1.44444	1.03175	3.18182	3.72727	4.3	3.16667	4.1
2252	1	20	2	1	1	2	3	1	1	1	0	1	0	0	0	1	0	4	2	1	2	2	2	1.44444	1.03175	3.18182	3.72727	4.3	3.16667	4.1
2253	1	20	2	1	1	2	3	1	1	1	0	1	0	0	0	1	0	4	2	1	2	2	2	1.44444	1.03175	3.18182	3.72727	4.3	3.16667	4.1
2254	1	20	2	1	1	2	3	1	1	1	0	1	0	0	0	1	0	4	2	1	2	2	2	1.44444	1.03175	3.18182	3.72727	4.3	3.16667	4.1
2255	1	20	2	1	1	2	3	1	1	1	0	1	0	0	0	1	0	4	2	1	2	2	2	1.44444	1.03175	3.18182	3.72727	4.3	3.16667	4.1
2256	2	20	1	1	2	2	2	1	1	1	0	0	0	0	0	0	0	7	3	2	1	2.75	2.3	2.22222	1.5873	3.81818	3.63636	2.5	4.66667	1.9
2257	2	20	1	1	2	2	2	1	1	1	0	0	0	0	0	0	0	7	3	2	1	2.75	2.3	2.22222	1.5873	3.81818	3.63636	2.5	4.66667	1.9
2258	2	20	1	1	2	2	2	1	1	1	0	0	0	0	0	0	0	7	3	2	1	2.75	2.3	2.22222	1.5873	3.81818	3.63636	2.5	4.66667	1.9
2259	2	20	1	1	2	2	2	1	1	1	0	0	0	0	0	0	0	7	3	2	1	2.75	2.3	2.22222	1.5873	3.81818	3.63636	2.5	4.66667	1.9
2260	2	20	1	1	2	2	2	1	1	1	0	0	0	0	0	0	0	7	3	2	1	2.75	2.3	2.22222	1.5873	3.81818	3.63636	2.5	4.66667	1.9
2261	2	20	1	1	2	2	2	1	1	1	0	0	0	0	0	0	0	7	3	2	1	2.75	2.3	2.22222	1.5873	3.81818	3.63636	2.5	4.66667	1.9
2262	2	20	1	1	2	2	2	1	1	1	0	0	0	0	0	0	0	7	3	2	1	2.75	2.3	2.22222	1.5873	3.81818	3.63636	2.5	4.66667	1.9
2263	2	20	1	1	2	2	2	1	1	1	0	0	0	0	0	0	0	7	3	2	1	2.75	2.3	2.22222	1.5873	3.81818	3.63636	2.5	4.66667	1.9
2264	1	20	2	1	2	2	3	1	1	0	1	1	1	0	0	0	0	3	3	2	2.16667	2.75	2.7	3	2.14286	3.63636	3	3.9	2.75	3.6
2265	1	20	2	1	2	2	3	1	1	0	1	1	1	0	0	0	0	3	3	2	2.16667	2.75	2.7	3	2.14286	3.63636	3	3.9	2.75	3.6
2266	1	20	2	1	2	2	3	1	1	0	1	1	1	0	0	0	0	3	3	2	2.16667	2.75	2.7	3	2.14286	3.63636	3	3.9	2.75	3.6
2267	1	20	2	1	2	2	3	1	1	0	1	1	1	0	0	0	0	3	3	2	2.16667	2.75	2.7	3	2.14286	3.63636	3	3.9	2.75	3.6
2268	2	20	1	1	2	2	2	1	1	1	0	0	0	0	0	0	0	7	3	2	1	2.75	2.3	2.22222	1.5873	3.81818	3.63636	2.5	4.66667	1.9
2269	2	20	1	1	2	2	2	1	1	1	0	0	0	0	0	0	0	7	3	2	1	2.75	2.3	2.22222	1.5873	3.81818	3.63636	2.5	4.66667	1.9
2270	2	20	1	1	2	2	2	1	1	1	0	0	0	0	0	0	0	7	3	2	1	2.75	2.3	2.22222	1.5873	3.81818	3.63636	2.5	4.66667	1.9
2271	2	20	1	1	2	2	2	1	1	1	0	0	0	0	0	0	0	7	3	2	1	2.75	2.3	2.22222	1.5873	3.81818	3.63636	2.5	4.66667	1.9
2272	2	20	1	1	2	2	2	1	1	1	0	0	0	0	0	0	0	7	3	2	1	2.75	2.3	2.22222	1.5873	3.81818	3.63636	2.5	4.66667	1.9
2273	2	20	1	1	2	2	2	1	1	1	0	0	0	0	0	0	0	7	3	2	1	2.75	2.3	2.22222	1.5873	3.81818	3.63636	2.5	4.66667	1.9
2274	2	20	1	1	2	2	2	1	1	1	0	0	0	0	0	0	0	7	3	2	1	2.75	2.3	2.22222	1.5873	3.81818	3.63636	2.5	4.66667	1.9
2275	2	20	1	1	2	2	2	1	1	1	0	0	0	0	0	0	0	7	3	2	1	2.75	2.3	2.22222	1.5873	3.81818	3.63636	2.5	4.66667	1.9
2276	2	19	2	1	1	2	3	1	1	1	0	1	0	0	0	0	0	5	1	2	2	1.25	2.5	1.44444	1.03175	3	2.18182	3	3	3
2277	2	19	2	1	1	2	3	1	1	1	0	1	0	0	0	0	0	5	1	2	2	1.25	2.5	1.44444	1.03175	3	2.18182	3	3	3
2278	2	19	2	1	1	2	3	1	1	1	0	1	0	0	0	0	0	5	1	2	2	1.25	2.5	1.44444	1.03175	3	2.18182	3	3	3
2279	2	19	2	1	1	2	3	1	1	1	0	1	0	0	0	0	0	5	1	2	2	1.25	2.5	1.44444	1.03175	3	2.18182	3	3	3
2280	2	19	2	1	1	2	3	1	1	1	0	1	0	0	0	0	0	5	1	2	2	1.25	2.5	1.44444	1.03175	3	2.18182	3	3	3
2281	2	19	2	1	1	2	3	1	1	1	0	1	0	0	0	0	0	5	1	2	2	1.25	2.5	1.44444	1.03175	3	2.18182	3	3	3
2282	2	19	2	1	1	2	3	1	1	1	0	1	0	0	0	0	0	5	1	2	2	1.25	2.5	1.44444	1.03175	3	2.18182	3	3	3
2283	2	19	2	1	1	2	3	1	1	1	0	1	0	0	0	0	0	5	1	2	2	1.25	2.5	1.44444	1.03175	3	2.18182	3	3	3
2284	1	20	1	1	1	2	2	1	1	1	0	0	0	0	0	0	0	7	9	1	4.83333	3.25	3.8	4.44444	3.1746	4	3.09091	4	4.33333	2.2
2285	1	20	1	1	1	2	2	1	1	1	0	0	0	0	0	0	0	7	9	1	4.83333	3.25	3.8	4.44444	3.1746	4	3.09091	4	4.33333	2.2
2286	1	20	1	1	1	2	2	1	1	1	0	0	0	0	0	0	0	7	9	1	4.83333	3.25	3.8	4.44444	3.1746	4	3.09091	4	4.33333	2.2
2287	1	20	1	1	1	2	2	1	1	1	0	0	0	0	0	0	0	7	9	1	4.83333	3.25	3.8	4.44444	3.1746	4	3.09091	4	4.33333	2.2
2288	2	18	2	1	1	2	4	1	1	1	0	0	0	0	0	0	0	6	2	2	2.16667	4	2.8	5.11111	3.65079	3.63636	4	3.7	3.25	2.4
2289	2	18	2	1	1	2	4	1	1	1	0	0	0	0	0	0	0	6	2	2	2.16667	4	2.8	5.11111	3.65079	3.63636	4	3.7	3.25	2.4
2290	2	18	2	1	1	2	4	1	1	1	0	0	0	0	0	0	0	6	2	2	2.16667	4	2.8	5.11111	3.65079	3.63636	4	3.7	3.25	2.4
2291	2	18	2	1	1	2	4	1	1	1	0	0	0	0	0	0	0	6	2	2	2.16667	4	2.8	5.11111	3.65079	3.63636	4	3.7	3.25	2.4
2292	2	18	2	1	1	2	4	1	1	1	0	0	0	0	0	0	0	6	2	2	2.16667	4	2.8	5.11111	3.65079	3.63636	4	3.7	3.25	2.4
2293	2	18	2	1	1	2	4	1	1	1	0	0	0	0	0	0	0	6	2	2	2.16667	4	2.8	5.11111	3.65079	3.63636	4	3.7	3.25	2.4
2294	2	18	2	1	1	2	4	1	1	1	0	0	0	0	0	0	0	6	2	2	2.16667	4	2.8	5.11111	3.65079	3.63636	4	3.7	3.25	2.4
2295	2	18	2	1	1	2	4	1	1	1	0	0	0	0	0	0	0	6	2	2	2.16667	4	2.8	5.11111	3.65079	3.63636	4	3.7	3.25	2.4
2296	2	19	1	1	1	2	3	1	1	1	0	0	0	0	0	0	0	7	5	2	2.16667	2.5	2.6	4.11111	2.93651	2.63636	3.45455	3.4	3.33333	3.2
2297	2	19	1	1	1	2	3	1	1	1	0	0	0	0	0	0	0	7	5	2	2.16667	2.5	2.6	4.11111	2.93651	2.63636	3.45455	3.4	3.33333	3.2
2298	2	19	1	1	1	2	3	1	1	1	0	0	0	0	0	0	0	7	5	2	2.16667	2.5	2.6	4.11111	2.93651	2.63636	3.45455	3.4	3.33333	3.2
2299	2	19	1	1	1	2	3	1	1	1	0	0	0	0	0	0	0	7	5	2	2.16667	2.5	2.6	4.11111	2.93651	2.63636	3.45455	3.4	3.33333	3.2
2300	2	19	1	1	1	2	3	1	1	1	0	0	0	0	0	0	0	7	5	2	2.16667	2.5	2.6	4.11111	2.93651	2.63636	3.45455	3.4	3.33333	3.2
2301	2	19	1	1	1	2	3	1	1	1	0	0	0	0	0	0	0	7	5	2	2.16667	2.5	2.6	4.11111	2.93651	2.63636	3.45455	3.4	3.33333	3.2
2302	2	19	1	1	1	2	3	1	1	1	0	0	0	0	0	0	0	7	5	2	2.16667	2.5	2.6	4.11111	2.93651	2.63636	3.45455	3.4	3.33333	3.2
2303	2	19	1	1	1	2	3	1	1	1	0	0	0	0	0	0	0	7	5	2	2.16667	2.5	2.6	4.11111	2.93651	2.63636	3.45455	3.4	3.33333	3.2
2304	2	20	2	1	2	2	4	1	1	1	0	1	1	0	0	0	0	4	3	2	4.5	3.75	2.7	3.22222	2.30159	3.18182	3.81818	4	3.41667	3.1
2305	2	20	2	1	2	2	4	1	1	1	0	1	1	0	0	0	0	4	3	2	4.5	3.75	2.7	3.22222	2.30159	3.18182	3.81818	4	3.41667	3.1
2306	2	20	2	1	2	2	4	1	1	1	0	1	1	0	0	0	0	4	3	2	4.5	3.75	2.7	3.22222	2.30159	3.18182	3.81818	4	3.41667	3.1
2307	2	20	2	1	2	2	4	1	1	1	0	1	1	0	0	0	0	4	3	2	4.5	3.75	2.7	3.22222	2.30159	3.18182	3.81818	4	3.41667	3.1
2308	2	20	2	1	2	2	4	1	1	1	0	1	1	0	0	0	0	4	3	2	4.5	3.75	2.7	3.22222	2.30159	3.18182	3.81818	4	3.41667	3.1
2309	2	20	2	1	2	2	4	1	1	1	0	1	1	0	0	0	0	4	3	2	4.5	3.75	2.7	3.22222	2.30159	3.18182	3.81818	4	3.41667	3.1
2310	2	20	2	1	2	2	4	1	1	1	0	1	1	0	0	0	0	4	3	2	4.5	3.75	2.7	3.22222	2.30159	3.18182	3.81818	4	3.41667	3.1
2311	2	20	2	1	2	2	4	1	1	1	0	1	1	0	0	0	0	4	3	2	4.5	3.75	2.7	3.22222	2.30159	3.18182	3.81818	4	3.41667	3.1
2312	1	19	1	1	2	1	2	1	1	1	1	1	1	1	0	1	0	6	1	2	1	3.5	2.6	4.22222	3.01587	3.45455	2.45455	4.2	3.33333	3.8
2313	1	19	1	1	2	1	2	1	1	1	1	1	1	1	0	1	0	6	1	2	1	3.5	2.6	4.22222	3.01587	3.45455	2.45455	4.2	3.33333	3.8
2314	1	19	1	1	2	1	2	1	1	1	1	1	1	1	0	1	0	6	1	2	1	3.5	2.6	4.22222	3.01587	3.45455	2.45455	4.2	3.33333	3.8
2315	1	19	1	1	2	1	2	1	1	1	1	1	1	1	0	1	0	6	1	2	1	3.5	2.6	4.22222	3.01587	3.45455	2.45455	4.2	3.33333	3.8
2316	2	19	1	1	1	2	3	1	1	1	0	0	0	0	0	0	0	3	5	2	4	3	2.9	4	2.85714	3	3.36364	3.3	2.41667	3.2
2317	2	19	1	1	1	2	3	1	1	1	0	0	0	0	0	0	0	3	5	2	4	3	2.9	4	2.85714	3	3.36364	3.3	2.41667	3.2
2318	2	19	1	1	1	2	3	1	1	1	0	0	0	0	0	0	0	3	5	2	4	3	2.9	4	2.85714	3	3.36364	3.3	2.41667	3.2
2319	2	19	1	1	1	2	3	1	1	1	0	0	0	0	0	0	0	3	5	2	4	3	2.9	4	2.85714	3	3.36364	3.3	2.41667	3.2
2320	1	19	1	1	1	2	4	1	1	1	0	0	0	0	0	0	1	4	3	2	1	2.75	1	1.11111	0.793651	1.72727	1.72727	4	1	4.1
2321	1	19	1	1	1	2	4	1	1	1	0	0	0	0	0	0	1	4	3	2	1	2.75	1	1.11111	0.793651	1.72727	1.72727	4	1	4.1
2322	1	19	1	1	1	2	4	1	1	1	0	0	0	0	0	0	1	4	3	2	1	2.75	1	1.11111	0.793651	1.72727	1.72727	4	1	4.1
2323	1	19	1	1	1	2	4	1	1	1	0	0	0	0	0	0	1	4	3	2	1	2.75	1	1.11111	0.793651	1.72727	1.72727	4	1	4.1
2324	1	19	1	1	1	2	4	1	1	1	0	0	0	0	0	0	1	4	3	2	1	2.75	1	1.11111	0.793651	1.72727	1.72727	4	1	4.1
2325	1	19	1	1	1	2	4	1	1	1	0	0	0	0	0	0	1	4	3	2	1	2.75	1	1.11111	0.793651	1.72727	1.72727	4	1	4.1
2326	1	19	1	1	1	2	4	1	1	1	0	0	0	0	0	0	1	4	3	2	1	2.75	1	1.11111	0.793651	1.72727	1.72727	4	1	4.1
2327	1	19	1	1	1	2	4	1	1	1	0	0	0	0	0	0	1	4	3	2	1	2.75	1	1.11111	0.793651	1.72727	1.72727	4	1	4.1
2328	2	18	1	1	1	2	2	1	1	1	0	0	0	0	0	0	0	2	1	2	2.5	3	2.2	2	1.42857	2	2.36364	2	1.66667	3.2
2329	2	18	1	1	1	2	2	1	1	1	0	0	0	0	0	0	0	2	1	2	2.5	3	2.2	2	1.42857	2	2.36364	2	1.66667	3.2
2330	2	18	1	1	1	2	2	1	1	1	0	0	0	0	0	0	0	2	1	2	2.5	3	2.2	2	1.42857	2	2.36364	2	1.66667	3.2
2331	2	18	1	1	1	2	2	1	1	1	0	0	0	0	0	0	0	2	1	2	2.5	3	2.2	2	1.42857	2	2.36364	2	1.66667	3.2
2332	2	18	1	1	1	2	2	1	1	0	0	0	0	0	0	0	0	4	2	1	1.5	1.5	1.2	1.55556	1.11111	2	4.54545	3.8	4.08333	1
2333	2	18	1	1	1	2	2	1	1	0	0	0	0	0	0	0	0	4	2	1	1.5	1.5	1.2	1.55556	1.11111	2	4.54545	3.8	4.08333	1
2334	2	18	1	1	1	2	2	1	1	0	0	0	0	0	0	0	0	4	2	1	1.5	1.5	1.2	1.55556	1.11111	2	4.54545	3.8	4.08333	1
2335	2	18	1	1	1	2	2	1	1	0	0	0	0	0	0	0	0	4	2	1	1.5	1.5	1.2	1.55556	1.11111	2	4.54545	3.8	4.08333	1
2336	2	18	1	1	1	2	2	1	1	0	0	0	0	0	0	0	0	4	2	1	1.5	1.5	1.2	1.55556	1.11111	2	4.54545	3.8	4.08333	1
2337	2	20	2	2	1	2	2	1	1	0	0	1	1	0	0	0	0	3	3	2	2.66667	1.5	2.6	1	0.714286	3.45455	3.36364	4.3	4	3.7
2338	2	20	2	2	1	2	2	1	1	0	0	1	1	0	0	0	0	3	3	2	2.66667	1.5	2.6	1	0.714286	3.45455	3.36364	4.3	4	3.7
2339	2	20	2	2	1	2	2	1	1	0	0	1	1	0	0	0	0	3	3	2	2.66667	1.5	2.6	1	0.714286	3.45455	3.36364	4.3	4	3.7
2340	2	20	2	2	1	2	2	1	1	0	0	1	1	0	0	0	0	3	3	2	2.66667	1.5	2.6	1	0.714286	3.45455	3.36364	4.3	4	3.7
2341	1	19	1	1	1	2	3	1	1	0	0	1	0	0	0	0	0	7	1	2	1.5	3.25	2.4	4.22222	3.01587	3.18182	3	3.9	3.16667	2.7
2342	1	19	1	1	1	2	3	1	1	0	0	1	0	0	0	0	0	7	1	2	1.5	3.25	2.4	4.22222	3.01587	3.18182	3	3.9	3.16667	2.7
2343	1	19	1	1	1	2	3	1	1	0	0	1	0	0	0	0	0	7	1	2	1.5	3.25	2.4	4.22222	3.01587	3.18182	3	3.9	3.16667	2.7
2344	1	19	1	1	1	2	3	1	1	0	0	1	0	0	0	0	0	7	1	2	1.5	3.25	2.4	4.22222	3.01587	3.18182	3	3.9	3.16667	2.7
2345	2	20	2	2	2	2	4	1	1	1	1	1	0	0	0	0	0	7	8	2	5.5	3.5	3.5	4.22222	3.01587	3.72727	3.81818	4.3	4.33333	2.6
2346	2	20	2	2	2	2	4	1	1	1	1	1	0	0	0	0	0	7	8	2	5.5	3.5	3.5	4.22222	3.01587	3.72727	3.81818	4.3	4.33333	2.6
2347	2	20	2	2	2	2	4	1	1	1	1	1	0	0	0	0	0	7	8	2	5.5	3.5	3.5	4.22222	3.01587	3.72727	3.81818	4.3	4.33333	2.6
2348	2	20	2	2	2	2	4	1	1	1	1	1	0	0	0	0	0	7	8	2	5.5	3.5	3.5	4.22222	3.01587	3.72727	3.81818	4.3	4.33333	2.6
2349	2	19	2	2	2	1	2	1	1	0	0	0	0	0	0	0	0	5	6	2	2.33333	2.75	2.1	3.44444	2.46032	3.09091	3.54545	4.9	2.58333	4.1
2350	2	19	2	2	2	1	2	1	1	0	0	0	0	0	0	0	0	5	6	2	2.33333	2.75	2.1	3.44444	2.46032	3.09091	3.54545	4.9	2.58333	4.1
2351	2	19	2	2	2	1	2	1	1	0	0	0	0	0	0	0	0	5	6	2	2.33333	2.75	2.1	3.44444	2.46032	3.09091	3.54545	4.9	2.58333	4.1
2352	2	19	2	2	2	1	2	1	1	0	0	0	0	0	0	0	0	5	6	2	2.33333	2.75	2.1	3.44444	2.46032	3.09091	3.54545	4.9	2.58333	4.1
2353	2	19	2	2	2	1	2	1	1	0	0	0	0	0	0	0	0	5	6	2	2.33333	2.75	2.1	3.44444	2.46032	3.09091	3.54545	4.9	2.58333	4.1
2354	2	19	2	2	2	1	2	1	1	0	0	0	0	0	0	0	0	5	6	2	2.33333	2.75	2.1	3.44444	2.46032	3.09091	3.54545	4.9	2.58333	4.1
2355	2	19	2	2	2	1	2	1	1	0	0	0	0	0	0	0	0	5	6	2	2.33333	2.75	2.1	3.44444	2.46032	3.09091	3.54545	4.9	2.58333	4.1
2356	2	18	1	1	2	2	3	1	1	1	0	0	0	0	0	0	0	2	3	1	5	3	2.7	3.33333	2.38095	2.63636	3.45455	3	3	3.6
2357	2	18	1	1	2	2	3	1	1	1	0	0	0	0	0	0	0	2	3	1	5	3	2.7	3.33333	2.38095	2.63636	3.45455	3	3	3.6
2358	2	18	1	1	2	2	3	1	1	1	0	0	0	0	0	0	0	2	3	1	5	3	2.7	3.33333	2.38095	2.63636	3.45455	3	3	3.6
2359	2	18	1	1	2	2	3	1	1	1	0	0	0	0	0	0	0	2	3	1	5	3	2.7	3.33333	2.38095	2.63636	3.45455	3	3	3.6
2360	2	19	1	1	1	2	4	1	1	0	0	1	0	0	1	0	1	5	7	2	4.66667	1.75	3.6	4.88889	3.49206	3.72727	2.63636	4.1	3.33333	3.3
2361	2	19	1	1	1	2	4	1	1	0	0	1	0	0	1	0	1	5	7	2	4.66667	1.75	3.6	4.88889	3.49206	3.72727	2.63636	4.1	3.33333	3.3
2362	2	19	1	1	1	2	4	1	1	0	0	1	0	0	1	0	1	5	7	2	4.66667	1.75	3.6	4.88889	3.49206	3.72727	2.63636	4.1	3.33333	3.3
2363	2	19	1	1	1	2	4	1	1	0	0	1	0	0	1	0	1	5	7	2	4.66667	1.75	3.6	4.88889	3.49206	3.72727	2.63636	4.1	3.33333	3.3
2364	1	19	1	1	1	2	3	1	1	1	0	1	0	0	0	1	0	4	9	2	2	2	2.2	2.22222	1.5873	2.81818	3.54545	2.9	3.41667	2.9
2365	1	19	1	1	1	2	3	1	1	1	0	1	0	0	0	1	0	4	9	2	2	2	2.2	2.22222	1.5873	2.81818	3.54545	2.9	3.41667	2.9
2366	1	19	1	1	1	2	3	1	1	1	0	1	0	0	0	1	0	4	9	2	2	2	2.2	2.22222	1.5873	2.81818	3.54545	2.9	3.41667	2.9
2367	1	19	1	1	1	2	3	1	1	1	0	1	0	0	0	1	0	4	9	2	2	2	2.2	2.22222	1.5873	2.81818	3.54545	2.9	3.41667	2.9
2368	1	19	1	1	1	2	3	1	1	1	0	1	0	0	0	1	0	4	9	2	2	2	2.2	2.22222	1.5873	2.81818	3.54545	2.9	3.41667	2.9
2369	1	19	1	1	1	2	3	1	1	1	0	1	0	0	0	1	0	4	9	2	2	2	2.2	2.22222	1.5873	2.81818	3.54545	2.9	3.41667	2.9
2370	1	19	1	1	1	2	3	1	1	1	0	1	0	0	0	1	0	4	9	2	2	2	2.2	2.22222	1.5873	2.81818	3.54545	2.9	3.41667	2.9
2371	1	19	1	1	1	2	3	1	1	1	0	1	0	0	0	1	0	4	9	2	2	2	2.2	2.22222	1.5873	2.81818	3.54545	2.9	3.41667	2.9
2372	2	19	1	1	2	2	3	1	1	1	1	0	0	0	0	0	0	6	7	2	2.66667	4	2.5	3.33333	2.38095	2.81818	2.54545	4.8	2.83333	4.2
2373	2	19	1	1	2	2	3	1	1	1	1	0	0	0	0	0	0	6	7	2	2.66667	4	2.5	3.33333	2.38095	2.81818	2.54545	4.8	2.83333	4.2
2374	2	19	1	1	2	2	3	1	1	1	1	0	0	0	0	0	0	6	7	2	2.66667	4	2.5	3.33333	2.38095	2.81818	2.54545	4.8	2.83333	4.2
2375	2	19	1	1	2	2	3	1	1	1	1	0	0	0	0	0	0	6	7	2	2.66667	4	2.5	3.33333	2.38095	2.81818	2.54545	4.8	2.83333	4.2
2376	2	20	2	2	1	1	3	1	1	1	0	0	0	0	0	1	0	5	9	1	1	2	1.4	1.66667	1.19048	2.81818	1.72727	1	1	4.6
2377	2	20	2	2	1	1	3	1	1	1	0	0	0	0	0	1	0	5	9	1	1	2	1.4	1.66667	1.19048	2.81818	1.72727	1	1	4.6
2378	2	20	2	2	1	1	3	1	1	1	0	0	0	0	0	1	0	5	9	1	1	2	1.4	1.66667	1.19048	2.81818	1.72727	1	1	4.6
2379	2	20	2	2	1	1	3	1	1	1	0	0	0	0	0	1	0	5	9	1	1	2	1.4	1.66667	1.19048	2.81818	1.72727	1	1	4.6
2380	2	19	1	1	1	2	3	1	1	1	0	1	0	0	0	0	0	6	2	2	2.5	3.5	2.3	4.11111	2.93651	3.18182	3.36364	4	3.5	2.6
2381	2	19	1	1	1	2	3	1	1	1	0	1	0	0	0	0	0	6	2	2	2.5	3.5	2.3	4.11111	2.93651	3.18182	3.36364	4	3.5	2.6
2382	2	19	1	1	1	2	3	1	1	1	0	1	0	0	0	0	0	6	2	2	2.5	3.5	2.3	4.11111	2.93651	3.18182	3.36364	4	3.5	2.6
2383	2	19	1	1	1	2	3	1	1	1	0	1	0	0	0	0	0	6	2	2	2.5	3.5	2.3	4.11111	2.93651	3.18182	3.36364	4	3.5	2.6
2384	2	20	2	2	1	1	3	1	1	0	0	1	0	0	0	0	0	2	7	2	1	2.5	1.4	2.66667	1.90476	2.18182	2.27273	4	1.91667	4.2
2385	2	20	2	2	1	1	3	1	1	0	0	1	0	0	0	0	0	2	7	2	1	2.5	1.4	2.66667	1.90476	2.18182	2.27273	4	1.91667	4.2
2386	2	20	2	2	1	1	3	1	1	0	0	1	0	0	0	0	0	2	7	2	1	2.5	1.4	2.66667	1.90476	2.18182	2.27273	4	1.91667	4.2
2387	2	20	2	2	1	1	3	1	1	0	0	1	0	0	0	0	0	2	7	2	1	2.5	1.4	2.66667	1.90476	2.18182	2.27273	4	1.91667	4.2
2388	2	20	1	1	1	1	3	1	1	1	0	1	1	0	0	0	0	6	5	2	3	2.75	2.7	3.55556	2.53968	3	3.36364	3.5	3.16667	3.5
2389	2	20	1	1	1	1	3	1	1	1	0	1	1	0	0	0	0	6	5	2	3	2.75	2.7	3.55556	2.53968	3	3.36364	3.5	3.16667	3.5
2390	2	20	1	1	1	1	3	1	1	1	0	1	1	0	0	0	0	6	5	2	3	2.75	2.7	3.55556	2.53968	3	3.36364	3.5	3.16667	3.5
2391	2	20	1	1	1	1	3	1	1	1	0	1	1	0	0	0	0	6	5	2	3	2.75	2.7	3.55556	2.53968	3	3.36364	3.5	3.16667	3.5
2392	2	20	1	1	1	1	3	1	1	1	0	1	1	0	0	0	0	6	5	2	3	2.75	2.7	3.55556	2.53968	3	3.36364	3.5	3.16667	3.5
2393	2	20	1	1	1	1	3	1	1	1	0	1	1	0	0	0	0	6	5	2	3	2.75	2.7	3.55556	2.53968	3	3.36364	3.5	3.16667	3.5
2394	2	20	1	1	1	1	3	1	1	1	0	1	1	0	0	0	0	6	5	2	3	2.75	2.7	3.55556	2.53968	3	3.36364	3.5	3.16667	3.5
2395	2	20	1	1	1	1	3	1	1	1	0	1	1	0	0	0	0	6	5	2	3	2.75	2.7	3.55556	2.53968	3	3.36364	3.5	3.16667	3.5
2396	1	21	2	2	2	2	2	1	1	1	0	0	0	0	0	0	0	6	5	1	4	3.5	3.3	2.55556	1.8254	3.09091	4.27273	3.7	4.91667	2.5
2397	1	21	2	2	2	2	2	1	1	1	0	0	0	0	0	0	0	6	5	1	4	3.5	3.3	2.55556	1.8254	3.09091	4.27273	3.7	4.91667	2.5
2398	1	21	2	2	2	2	2	1	1	1	0	0	0	0	0	0	0	6	5	1	4	3.5	3.3	2.55556	1.8254	3.09091	4.27273	3.7	4.91667	2.5
2399	1	21	2	2	2	2	2	1	1	1	0	0	0	0	0	0	0	6	5	1	4	3.5	3.3	2.55556	1.8254	3.09091	4.27273	3.7	4.91667	2.5
2400	2	19	1	1	2	2	2	1	1	1	0	0	0	0	0	0	0	3	1	2	3.5	3	2.5	4.22222	3.01587	2.90909	2.63636	3.6	2.91667	3.5
2401	2	19	1	1	2	2	2	1	1	1	0	0	0	0	0	0	0	3	1	2	3.5	3	2.5	4.22222	3.01587	2.90909	2.63636	3.6	2.91667	3.5
2402	2	19	1	1	2	2	2	1	1	1	0	0	0	0	0	0	0	3	1	2	3.5	3	2.5	4.22222	3.01587	2.90909	2.63636	3.6	2.91667	3.5
2403	2	19	1	1	2	2	2	1	1	1	0	0	0	0	0	0	0	3	1	2	3.5	3	2.5	4.22222	3.01587	2.90909	2.63636	3.6	2.91667	3.5
2404	2	19	1	1	2	2	2	1	1	1	0	0	0	0	0	0	0	3	1	2	3.5	3	2.5	4.22222	3.01587	2.90909	2.63636	3.6	2.91667	3.5
2405	2	19	1	1	2	2	2	1	1	1	0	0	0	0	0	0	0	3	1	2	3.5	3	2.5	4.22222	3.01587	2.90909	2.63636	3.6	2.91667	3.5
2406	2	19	1	1	2	2	2	1	1	1	0	0	0	0	0	0	0	3	1	2	3.5	3	2.5	4.22222	3.01587	2.90909	2.63636	3.6	2.91667	3.5
2407	2	19	1	1	2	2	2	1	1	1	0	0	0	0	0	0	0	3	1	2	3.5	3	2.5	4.22222	3.01587	2.90909	2.63636	3.6	2.91667	3.5
2408	1	19	1	1	1	2	4	1	0	1	0	0	0	0	0	0	0	2	9	2	3	2.5	2.1	4.66667	3.33333	2.27273	2.36364	2	2.75	4.3
2409	1	19	1	1	1	2	4	1	0	1	0	0	0	0	0	0	0	2	9	2	3	2.5	2.1	4.66667	3.33333	2.27273	2.36364	2	2.75	4.3
2410	1	19	1	1	1	2	4	1	0	1	0	0	0	0	0	0	0	2	9	2	3	2.5	2.1	4.66667	3.33333	2.27273	2.36364	2	2.75	4.3
2411	1	19	1	1	1	2	4	1	0	1	0	0	0	0	0	0	0	2	9	2	3	2.5	2.1	4.66667	3.33333	2.27273	2.36364	2	2.75	4.3
2412	2	19	2	2	1	1	3	1	1	1	1	1	0	0	0	0	1	7	2	2	2.16667	2.75	2.3	5.22222	3.73016	3.18182	3.18182	4	3.16667	3.8
2413	2	19	2	2	1	1	3	1	1	1	1	1	0	0	0	0	1	7	2	2	2.16667	2.75	2.3	5.22222	3.73016	3.18182	3.18182	4	3.16667	3.8
2414	2	19	2	2	1	1	3	1	1	1	1	1	0	0	0	0	1	7	2	2	2.16667	2.75	2.3	5.22222	3.73016	3.18182	3.18182	4	3.16667	3.8
2415	2	19	2	2	1	1	3	1	1	1	1	1	0	0	0	0	1	7	2	2	2.16667	2.75	2.3	5.22222	3.73016	3.18182	3.18182	4	3.16667	3.8
2416	2	19	2	2	1	1	3	1	1	1	1	1	0	0	0	0	1	7	2	2	2.16667	2.75	2.3	5.22222	3.73016	3.18182	3.18182	4	3.16667	3.8
2417	2	19	2	2	1	1	3	1	1	1	1	1	0	0	0	0	1	7	2	2	2.16667	2.75	2.3	5.22222	3.73016	3.18182	3.18182	4	3.16667	3.8
2418	2	19	2	2	1	1	3	1	1	1	1	1	0	0	0	0	1	7	2	2	2.16667	2.75	2.3	5.22222	3.73016	3.18182	3.18182	4	3.16667	3.8
2419	2	19	2	2	1	1	3	1	1	1	1	1	0	0	0	0	1	7	2	2	2.16667	2.75	2.3	5.22222	3.73016	3.18182	3.18182	4	3.16667	3.8
2420	2	18	1	1	1	1	2	1	1	1	0	0	0	0	0	0	0	3	2	2	2.83333	3.25	2.5	3.55556	2.53968	3.45455	2.90909	4	3.16667	4.1
2421	2	18	1	1	1	1	2	1	1	1	0	0	0	0	0	0	0	3	2	2	2.83333	3.25	2.5	3.55556	2.53968	3.45455	2.90909	4	3.16667	4.1
2422	2	18	1	1	1	1	2	1	1	1	0	0	0	0	0	0	0	3	2	2	2.83333	3.25	2.5	3.55556	2.53968	3.45455	2.90909	4	3.16667	4.1
2423	2	18	1	1	1	1	2	1	1	1	0	0	0	0	0	0	0	3	2	2	2.83333	3.25	2.5	3.55556	2.53968	3.45455	2.90909	4	3.16667	4.1
2424	1	20	2	2	1	1	4	1	1	0	0	1	0	0	0	1	0	1	6	1	3.33333	2.5	2.8	2.66667	1.90476	3.63636	4.09091	4.3	3.5	4
2425	1	20	2	2	1	1	4	1	1	0	0	1	0	0	0	1	0	1	6	1	3.33333	2.5	2.8	2.66667	1.90476	3.63636	4.09091	4.3	3.5	4
2426	1	20	2	2	1	1	4	1	1	0	0	1	0	0	0	1	0	1	6	1	3.33333	2.5	2.8	2.66667	1.90476	3.63636	4.09091	4.3	3.5	4
2427	1	20	2	2	1	1	4	1	1	0	0	1	0	0	0	1	0	1	6	1	3.33333	2.5	2.8	2.66667	1.90476	3.63636	4.09091	4.3	3.5	4
2428	1	19	1	1	1	1	2	1	0	0	0	0	0	0	0	0	0	2	1	2	1	2	1.2	1	0.714286	1.72727	1.72727	5	1	4
2429	1	19	1	1	1	1	2	1	0	0	0	0	0	0	0	0	0	2	1	2	1	2	1.2	1	0.714286	1.72727	1.72727	5	1	4
2430	1	19	1	1	1	1	2	1	0	0	0	0	0	0	0	0	0	2	1	2	1	2	1.2	1	0.714286	1.72727	1.72727	5	1	4
2431	1	19	1	1	1	1	2	1	0	0	0	0	0	0	0	0	0	2	1	2	1	2	1.2	1	0.714286	1.72727	1.72727	5	1	4
2432	2	19	1	1	1	1	2	1	1	1	0	1	0	0	0	1	0	6	9	2	2	3.5	3	4.11111	2.93651	2.90909	3.27273	4.8	2.91667	2.8
2433	2	19	1	1	1	1	2	1	1	1	0	1	0	0	0	1	0	6	9	2	2	3.5	3	4.11111	2.93651	2.90909	3.27273	4.8	2.91667	2.8
2434	2	19	1	1	1	1	2	1	1	1	0	1	0	0	0	1	0	6	9	2	2	3.5	3	4.11111	2.93651	2.90909	3.27273	4.8	2.91667	2.8
2435	2	19	1	1	1	1	2	1	1	1	0	1	0	0	0	1	0	6	9	2	2	3.5	3	4.11111	2.93651	2.90909	3.27273	4.8	2.91667	2.8
2436	1	19	1	1	1	2	3	1	1	1	0	1	1	1	0	1	0	7	5	2	1	3.5	1.1	1	0.714286	1.72727	1.72727	1	1	5
2437	1	19	1	1	1	2	3	1	1	1	0	1	1	1	0	1	0	7	5	2	1	3.5	1.1	1	0.714286	1.72727	1.72727	1	1	5
2438	1	19	1	1	1	2	3	1	1	1	0	1	1	1	0	1	0	7	5	2	1	3.5	1.1	1	0.714286	1.72727	1.72727	1	1	5
2439	1	19	1	1	1	2	3	1	1	1	0	1	1	1	0	1	0	7	5	2	1	3.5	1.1	1	0.714286	1.72727	1.72727	1	1	5
2440	2	20	2	2	2	2	3	1	1	1	0	0	0	0	0	0	0	4	2	2	2.16667	2.75	2.7	3	2.14286	3.45455	3.27273	4.3	3.58333	3
2441	2	20	2	2	2	2	3	1	1	1	0	0	0	0	0	0	0	4	2	2	2.16667	2.75	2.7	3	2.14286	3.45455	3.27273	4.3	3.58333	3
2442	2	20	2	2	2	2	3	1	1	1	0	0	0	0	0	0	0	4	2	2	2.16667	2.75	2.7	3	2.14286	3.45455	3.27273	4.3	3.58333	3
2443	2	20	2	2	2	2	3	1	1	1	0	0	0	0	0	0	0	4	2	2	2.16667	2.75	2.7	3	2.14286	3.45455	3.27273	4.3	3.58333	3
2444	2	20	1	1	2	1	2	1	1	1	0	1	0	1	0	1	0	7	1	2	1	5	2.1	2.66667	1.90476	3.45455	2.36364	3.6	2.5	3.8
2445	2	20	1	1	2	1	2	1	1	1	0	1	0	1	0	1	0	7	1	2	1	5	2.1	2.66667	1.90476	3.45455	2.36364	3.6	2.5	3.8
2446	2	20	1	1	2	1	2	1	1	1	0	1	0	1	0	1	0	7	1	2	1	5	2.1	2.66667	1.90476	3.45455	2.36364	3.6	2.5	3.8
2447	2	20	1	1	2	1	2	1	1	1	0	1	0	1	0	1	0	7	1	2	1	5	2.1	2.66667	1.90476	3.45455	2.36364	3.6	2.5	3.8
2448	2	18	2	1	2	2	2	1	0	1	0	0	0	0	0	0	0	7	5	2	1.5	3.25	3.1	2.33333	1.66667	3	3.72727	2.7	2.66667	3.1
2449	2	18	2	1	2	2	2	1	0	1	0	0	0	0	0	0	0	7	5	2	1.5	3.25	3.1	2.33333	1.66667	3	3.72727	2.7	2.66667	3.1
2450	2	18	2	1	2	2	2	1	0	1	0	0	0	0	0	0	0	7	5	2	1.5	3.25	3.1	2.33333	1.66667	3	3.72727	2.7	2.66667	3.1
2451	2	18	2	1	2	2	2	1	0	1	0	0	0	0	0	0	0	7	5	2	1.5	3.25	3.1	2.33333	1.66667	3	3.72727	2.7	2.66667	3.1
2452	2	18	2	1	2	2	2	1	0	1	0	0	0	0	0	0	0	7	5	2	1.5	3.25	3.1	2.33333	1.66667	3	3.72727	2.7	2.66667	3.1
2453	2	18	2	1	2	2	2	1	0	1	0	0	0	0	0	0	0	7	5	2	1.5	3.25	3.1	2.33333	1.66667	3	3.72727	2.7	2.66667	3.1
2454	2	18	2	1	2	2	2	1	0	1	0	0	0	0	0	0	0	7	5	2	1.5	3.25	3.1	2.33333	1.66667	3	3.72727	2.7	2.66667	3.1
2455	2	18	2	1	2	2	2	1	0	1	0	0	0	0	0	0	0	7	5	2	1.5	3.25	3.1	2.33333	1.66667	3	3.72727	2.7	2.66667	3.1
2456	2	19	1	1	2	2	2	1	0	1	0	0	0	0	0	0	0	4	1	1	2.5	3	2.9	4.77778	3.4127	2.54545	4.27273	3.5	4.08333	2.4
2457	2	19	1	1	2	2	2	1	0	1	0	0	0	0	0	0	0	4	1	1	2.5	3	2.9	4.77778	3.4127	2.54545	4.27273	3.5	4.08333	2.4
2458	2	19	1	1	2	2	2	1	0	1	0	0	0	0	0	0	0	4	1	1	2.5	3	2.9	4.77778	3.4127	2.54545	4.27273	3.5	4.08333	2.4
2459	2	19	1	1	2	2	2	1	0	1	0	0	0	0	0	0	0	4	1	1	2.5	3	2.9	4.77778	3.4127	2.54545	4.27273	3.5	4.08333	2.4
2460	2	19	1	1	1	2	2	1	1	1	0	1	0	0	0	0	0	4	1	2	2	2.5	2.4	3	2.14286	3	3.27273	3.7	3	2.9
2461	2	19	1	1	1	2	2	1	1	1	0	1	0	0	0	0	0	4	1	2	2	2.5	2.4	3	2.14286	3	3.27273	3.7	3	2.9
[truncated: 438 more rows]
